# Supplementary material
Source: publisher site journal article supplement (https://www.spandidos-publications.com/21/downloadSupplementary)
Supplement: Supplementary file 1 [file downloadSupplementary]

## Sheet: Peak list
Table SII. Peak map and statistical analysis of the CM10 and IMAC30 chip datasets. The 83 urine specimens were measured by surface-enhanced laser desorption/ionization-time-of-flight mass spectrometry (SELDI-TOF) on CM10 and IMAC30 chip types and analysed using clustering parameters as detailed in Materials and methods. Spectra-specific data, such as sample name and normalization factor, and peak…
Array Type	Sample Name	Cancer type	Normalization Factor	Cluster MZ	MZ	MZ WidthAtHalfHeight	Norm. Intensity	S/N	Resolution	Time of Flight	TOF WidthAtHalfHeight	Peak type
CM10	WEU0053	Gastric	1.51593	1507.55	1506.67	12.383	221.941	5.61911	121.673	1.35139e-05	5.55441e-08	FIRST_PASS
CM10	WEU0053	Gastric	1.51593	1733.86	1733.86	8.92547	76.5673	1.80449	194.26	1.44971e-05	3.73136e-08	ESTIMATED
CM10	WEU0053	Gastric	1.51593	1754.42	1752.78	13.0595	112.034	2.62577	134.215	1.45759e-05	5.4309e-08	SECOND_PASS
CM10	WEU0053	Gastric	1.51593	1954.32	1954.32	11.1122	38.0561	1.04778	175.872	1.53912e-05	4.37526e-08	ESTIMATED
CM10	WEU0053	Gastric	1.51593	1977.43	1977.43	12.9973	62.1895	1.76658	152.141	1.54819e-05	5.08899e-08	ESTIMATED
CM10	WEU0053	Gastric	1.51593	1996.56	1999.65	14.113	82.5464	2.4182	141.689	1.55686e-05	5.49455e-08	FIRST_PASS
CM10	WEU0053	Gastric	1.51593	2203.66	2203.59	11.3799	44.0162	1.78957	193.638	1.63432e-05	4.22187e-08	SECOND_PASS
CM10	WEU0053	Gastric	1.51593	2222.28	2222.28	12.5224	33.7284	1.42049	177.465	1.64124e-05	4.62322e-08	ESTIMATED
CM10	WEU0053	Gastric	1.51593	2240.07	2240.07	16.7435	22.7483	0.991773	133.787	1.6478e-05	6.15262e-08	ESTIMATED
CM10	WEU0053	Gastric	1.51593	2385.78	2385.78	10.4138	4.88616	0.274244	229.099	1.70055e-05	3.71437e-08	ESTIMATED
CM10	WEU0053	Gastric	1.51593	2447.38	2447.38	10.2075	13.1593	0.791745	239.763	1.72236e-05	3.59116e-08	ESTIMATED
CM10	WEU0053	Gastric	1.51593	2544.27	2544.27	45.773	10.9322	0.740198	55.5846	1.75612e-05	1.58571e-07	ESTIMATED
CM10	WEU0053	Gastric	1.51593	2578.52	2578.52	16.2037	7.03988	0.498452	159.131	1.7679e-05	5.55227e-08	ESTIMATED
CM10	WEU0053	Gastric	1.51593	2802.49	2802.49	17.8303	11.9679	1.19667	157.176	1.84308e-05	5.86079e-08	ESTIMATED
CM10	WEU0053	Gastric	1.51593	2954.6	2954.6	45.7849	7.69327	0.977017	64.5322	1.89244e-05	1.46148e-07	ESTIMATED
CM10	WEU0053	Gastric	1.51593	3005.81	3005.81	22.1762	6.22406	0.830674	135.542	1.90877e-05	7.04126e-08	ESTIMATED
CM10	WEU0053	Gastric	1.51593	3031.71	3031.71	18.2172	4.58839	0.628452	166.42	1.91698e-05	5.76168e-08	ESTIMATED
CM10	WEU0053	Gastric	1.51593	3101.32	3101.32	5.68706	3.15735	0.465005	545.329	1.93886e-05	1.77718e-08	ESTIMATED
CM10	WEU0053	Gastric	1.51593	3360.52	3360.52	0.380258	0.535176	0.108439	8837.47	2.01825e-05	1.14188e-09	ESTIMATED
CM10	WEU0053	Gastric	1.51593	3380.96	3380.96	16.0792	1.13852	0.237582	210.27	2.02438e-05	4.80948e-08	ESTIMATED
CM10	WEU0053	Gastric	1.51593	3454.61	3458.82	2.37978	5.75238	1.25956	1453.42	2.04756e-05	7.0438e-09	SECOND_PASS
CM10	WEU0053	Gastric	1.51593	3484.03	3484.03	63.596	-0.41118	-0.0913955	54.7837	2.05501e-05	1.875e-07	ESTIMATED
CM10	WEU0053	Gastric	1.51593	3590.56	3590.56	17.1176	3.49904	0.830354	209.758	2.08619e-05	4.97418e-08	ESTIMATED
CM10	WEU0053	Gastric	1.51593	3722.3	3722.3	5.92536	2.18142	0.56407	628.198	2.12412e-05	1.69028e-08	ESTIMATED
CM10	WEU0053	Gastric	1.51593	3905.3	3905.3	3.85738	5.5582	1.565	1012.42	2.1757e-05	1.07441e-08	ESTIMATED
CM10	WEU0053	Gastric	1.51593	3933.25	3933.25	36.5604	-0.0478423	-0.0135888	107.582	2.18348e-05	1.0125e-07	ESTIMATED
CM10	WEU0053	Gastric	1.51593	4037.3	4034.92	49.3877	17.6328	5.17179	81.6989	2.21152e-05	1.35158e-07	FIRST_PASS
CM10	WEU0053	Gastric	1.51593	4065.01	4065.01	58.4312	11.9186	3.52962	69.5692	2.21975e-05	1.59893e-07	ESTIMATED
CM10	WEU0053	Gastric	1.51593	4146.61	4146.61	2.82977	3.0844	0.93786	1465.35	2.24192e-05	7.64971e-09	ESTIMATED
CM10	WEU0053	Gastric	1.51593	4211.79	4211.79	2.30317	0.505537	0.157044	1828.7	2.25947e-05	6.17849e-09	ESTIMATED
CM10	WEU0053	Gastric	1.51593	4376.6	4382.41	33.0847	25.2053	8.29329	132.46	2.30478e-05	8.70276e-08	FIRST_PASS
CM10	WEU0053	Gastric	1.51593	4489.19	4489.09	40.2548	14.7993	5.05343	111.517	2.33266e-05	1.04524e-07	FIRST_PASS
CM10	WEU0053	Gastric	1.51593	4555.41	4552.7	31.5051	26.8286	9.37017	144.507	2.34913e-05	8.12804e-08	FIRST_PASS
CM10	WEU0053	Gastric	1.51593	4585.09	4585.09	231.018	10.3565	3.65945	19.8473	2.35747e-05	5.93902e-07	ESTIMATED
CM10	WEU0053	Gastric	1.51593	4645.37	4649.94	51.8888	26.2653	9.50217	89.6134	2.37409e-05	1.32422e-07	FIRST_PASS
CM10	WEU0053	Gastric	1.51593	4698.93	4698.93	266.463	12.9761	4.78006	17.6345	2.38656e-05	6.73394e-07	ESTIMATED
CM10	WEU0053	Gastric	1.51593	4767.2	4767.53	30.0921	144.809	54.7333	158.432	2.40392e-05	7.58608e-08	FIRST_PASS
CM10	WEU0053	Gastric	1.51593	4908.07	4908.07	241.786	5.63791	2.2605	20.2992	2.43909e-05	6.00785e-07	ESTIMATED
CM10	WEU0053	Gastric	1.51593	4976.17	4973.7	49.2895	13.3022	5.51935	100.908	2.45535e-05	1.21609e-07	FIRST_PASS
CM10	WEU0053	Gastric	1.51593	5084.44	5084.44	74.217	1.41272	0.622447	68.5078	2.48253e-05	1.80721e-07	ESTIMATED
CM10	WEU0053	Gastric	1.51593	5303.71	5303.71	1.84675	1.03147	0.516797	2871.92	2.53549e-05	4.41438e-09	ESTIMATED
CM10	WEU0053	Gastric	1.51593	5402.2	5402.2	17.5711	1.11261	0.579879	307.448	2.55893e-05	4.16066e-08	ESTIMATED
CM10	WEU0053	Gastric	1.51593	5524.52	5510.76	22.4821	4.62457	2.50399	245.118	2.58451e-05	5.27215e-08	FIRST_PASS
CM10	WEU0053	Gastric	1.51593	5619.57	5619.57	2.37421	0.0421852	0.0237582	2366.92	2.6099e-05	5.51281e-09	ESTIMATED
CM10	WEU0053	Gastric	1.51593	5709.09	5702.19	8.09071	2.58652	1.50209	704.783	2.62902e-05	1.86536e-08	SECOND_PASS
CM10	WEU0053	Gastric	1.51593	5818.95	5819.19	28.8505	3.46445	2.10397	201.701	2.65586e-05	6.58225e-08	SECOND_PASS
CM10	WEU0053	Gastric	1.51593	5885.74	5885.74	22.4524	1.0816	0.674267	262.143	2.671e-05	5.09022e-08	ESTIMATED
CM10	WEU0053	Gastric	1.51593	6201.92	6197.31	54.4913	8.5751	5.86374	113.73	2.74078e-05	1.20423e-07	FIRST_PASS
CM10	WEU0053	Gastric	1.51593	6358.11	6358.11	42.341	4.17663	2.99418	150.164	2.77611e-05	9.25393e-08	ESTIMATED
CM10	WEU0053	Gastric	1.51593	6448.74	6448.74	42.3745	1.64105	1.20909	152.184	2.79583e-05	9.18565e-08	ESTIMATED
CM10	WEU0053	Gastric	1.51593	6699.18	6699.18	92.3833	-0.637645	-0.508261	72.5151	2.8496e-05	1.9625e-07	ESTIMATED
CM10	WEU0053	Gastric	1.51593	7098.61	7098.61	16.6373	0.279749	0.25419	426.669	2.93332e-05	3.43705e-08	ESTIMATED
CM10	WEU0053	Gastric	1.51593	7273.9	7273.9	3.85887	0.429433	0.409024	1884.98	2.96932e-05	7.87591e-09	ESTIMATED
CM10	WEU0053	Gastric	1.51593	7327.57	7327.57	19.2681	1.02118	0.987115	380.295	2.98025e-05	3.91754e-08	ESTIMATED
CM10	WEU0053	Gastric	1.51593	7371.7	7371.7	19.116	-0.00719925	-0.00704497	385.63	2.98921e-05	3.875e-08	ESTIMATED
CM10	WEU0053	Gastric	1.51593	7498.7	7482.64	4.80377	1.25885	1.27109	1557.66	3.01162e-05	9.66737e-09	SECOND_PASS
CM10	WEU0053	Gastric	1.51593	7686.69	7686.69	25.0007	0.512881	0.549728	307.459	3.05241e-05	4.96557e-08	ESTIMATED
CM10	WEU0053	Gastric	1.51593	8039.87	8034.77	55.9756	5.70103	6.45706	143.541	3.12075e-05	1.08655e-07	FIRST_PASS
CM10	WEU0053	Gastric	1.51593	8204.63	8201.5	136.945	3.26947	3.77837	59.8889	3.15297e-05	2.63041e-07	SECOND_PASS
CM10	WEU0053	Gastric	1.51593	8316.73	8316.73	422.364	1.69765	1.98962	19.6909	3.17504e-05	8.14923e-07	ESTIMATED
CM10	WEU0053	Gastric	1.51593	8414.87	8414.87	51.1901	1.63702	1.94179	164.385	3.19372e-05	9.72587e-08	ESTIMATED
CM10	WEU0053	Gastric	1.51593	8485.43	8485.43	-0.109199	-0.0216361	-0.0258884	-77706.1	3.20708e-05	-2.06359e-10	ESTIMATED
CM10	WEU0053	Gastric	1.51593	8577.95	8577.95	51.2178	1.0689	1.29373	167.48	3.22452e-05	9.62031e-08	ESTIMATED
CM10	WEU0053	Gastric	1.51593	8794.7	8794.7	181.699	1.44881	1.80179	48.4026	3.265e-05	3.35586e-07	ESTIMATED
CM10	WEU0053	Gastric	1.51593	8879.33	8865.62	58.6353	4.61488	5.7909	151.199	3.27814e-05	1.08363e-07	FIRST_PASS
CM10	WEU0053	Gastric	1.51593	9114.7	9098.12	58.3714	3.95087	5.15489	155.866	3.32085e-05	1.06511e-07	FIRST_PASS
CM10	WEU0053	Gastric	1.51593	9515.82	9515.82	5.36077	0.522783	0.785702	1775.08	3.39622e-05	9.56621e-09	ESTIMATED
CM10	WEU0053	Gastric	1.51593	9618.76	9618.76	5.5348	0.884484	1.38026	1737.87	3.41454e-05	9.8237e-09	ESTIMATED
CM10	WEU0053	Gastric	1.51593	9788.19	9770.28	65.8211	3.98083	6.58108	148.437	3.44133e-05	1.1587e-07	FIRST_PASS
CM10	WEU0053	Gastric	1.51593	9980.84	9980.84	506.099	1.28538	2.31417	19.7211	3.47822e-05	8.8185e-07	ESTIMATED
CM10	WEU0053	Gastric	1.51593	10079.5	10079.5	94.2926	1.80897	3.38356	106.896	3.49536e-05	1.63615e-07	ESTIMATED
CM10	WEU0053	Gastric	1.51593	10117.5	10117.5	18.0645	0.895744	1.68951	560.079	3.50196e-05	3.125e-08	ESTIMATED
CM10	WEU0053	Gastric	1.51593	10232.2	10232.2	99.5892	1.13066	2.1878	102.745	3.52175e-05	1.71384e-07	ESTIMATED
CM10	WEU0053	Gastric	1.51593	10309.1	10309.1	46.4138	0.644285	1.26859	222.114	3.53496e-05	7.95612e-08	ESTIMATED
CM10	WEU0053	Gastric	1.51593	10447.6	10447.6	10.3681	0.224809	0.457034	1007.67	3.55862e-05	1.76547e-08	ESTIMATED
CM10	WEU0053	Gastric	1.51593	10570.1	10570.1	8.18587	0.233797	0.489284	1291.26	3.57942e-05	1.38601e-08	ESTIMATED
CM10	WEU0053	Gastric	1.51593	10681.8	10681.8	36.9259	0.283248	0.609031	289.278	3.59829e-05	6.22111e-08	ESTIMATED
CM10	WEU0053	Gastric	1.51593	10806	10786.1	54.2555	1.29801	2.86381	198.801	3.6158e-05	9.08916e-08	FIRST_PASS
CM10	WEU0053	Gastric	1.51593	10869.9	10869.9	173.228	0.506956	1.14238	62.7491	3.62983e-05	2.89713e-07	ESTIMATED
CM10	WEU0053	Gastric	1.51593	10982.1	10982.1	84.5949	0.51516	1.19487	129.82	3.64851e-05	1.40362e-07	ESTIMATED
CM10	WEU0053	Gastric	1.51593	11090.1	11090.1	60.3889	0.577309	1.36921	183.645	3.66641e-05	9.98549e-08	ESTIMATED
CM10	WEU0053	Gastric	1.51593	11782.6	11754.7	101.634	3.01244	7.83718	115.657	3.77466e-05	1.63002e-07	FIRST_PASS
CM10	WEU0053	Gastric	1.51593	11984.7	11984.7	419.339	1.40843	3.77456	28.5799	3.81141e-05	6.69198e-07	ESTIMATED
CM10	WEU0053	Gastric	1.51593	12300	12300	133.268	0.781508	2.1836	92.2953	3.86123e-05	2.09178e-07	ESTIMATED
CM10	WEU0053	Gastric	1.51593	12731.2	12731.2	25.2612	0.393592	1.16664	503.983	3.92833e-05	3.89641e-08	ESTIMATED
CM10	WEU0053	Gastric	1.51593	13373.5	13371.5	71.3045	1.07166	3.4848	187.527	4.0259e-05	1.07287e-07	FIRST_PASS
CM10	WEU0053	Gastric	1.51593	13803	13803	52.8144	0.30422	1.0575	261.35	4.09035e-05	7.82543e-08	ESTIMATED
CM10	WEU0053	Gastric	1.51593	13913.6	13901.7	152.799	0.719573	2.55449	90.9801	4.10494e-05	2.25205e-07	SECOND_PASS
CM10	WEU0053	Gastric	1.51593	14136.2	14136.2	37.9087	0.35371	1.32211	372.901	4.13942e-05	5.55029e-08	ESTIMATED
CM10	WEU0053	Gastric	1.51593	14724.3	14724.3	45.1034	0.153821	0.661462	326.456	4.22464e-05	6.47102e-08	ESTIMATED
CM10	WEU0053	Gastric	1.51593	15152.9	15152.9	75.1755	0.126772	0.59793	201.567	4.28569e-05	1.06331e-07	ESTIMATED
CM10	WEU0053	Gastric	1.51593	15310.6	15310.6	124.098	0.23535	1.14686	123.375	4.30793e-05	1.74381e-07	ESTIMATED
CM10	WEU0053	Gastric	1.51593	15864.9	15854	77.4151	1.28025	7.03345	204.792	4.38372e-05	1.06965e-07	FIRST_PASS
CM10	WEU0053	Gastric	1.51593	16033.6	16033.6	351.536	0.384306	2.20299	45.6101	4.40847e-05	4.84097e-07	ESTIMATED
CM10	WEU0053	Gastric	1.51593	16672.7	16672.7	433.809	0.232948	1.45719	38.4333	4.49548e-05	5.81502e-07	ESTIMATED
CM10	WEU0053	Gastric	1.51593	16824.4	16800.2	135.383	0.534727	3.39338	124.094	4.51264e-05	1.81878e-07	SECOND_PASS
CM10	WEU0053	Gastric	1.51593	16960.1	16922.3	170.566	0.566041	3.63005	99.2125	4.529e-05	2.28012e-07	FIRST_PASS
CM10	WEU0053	Gastric	1.51593	17122.2	17122.2	10.7343	0.134889	0.86796	1595.09	4.55567e-05	1.42803e-08	ESTIMATED
CM10	WEU0053	Gastric	1.51593	17164.7	17164.7	43.2039	0.157132	1.0118	397.294	4.56132e-05	5.74249e-08	ESTIMATED
CM10	WEU0053	Gastric	1.51593	17320.2	17320.2	26.5021	0.1447	0.934186	653.543	4.58195e-05	3.50502e-08	ESTIMATED
CM10	WEU0053	Gastric	1.51593	17500.5	17505.3	37.6367	0.263231	1.70469	465.113	4.60636e-05	4.95218e-08	SECOND_PASS
CM10	WEU0053	Gastric	1.51593	17650.4	17650.4	98.8942	0.140024	0.908997	178.478	4.62541e-05	1.2958e-07	ESTIMATED
CM10	WEU0053	Gastric	1.51593	18111.6	18111.6	14.353	0.166039	1.09673	1261.87	4.68545e-05	1.85655e-08	ESTIMATED
CM10	WEU0053	Gastric	1.51593	18178.6	18197.7	201.632	0.700006	4.64301	90.2522	4.69657e-05	2.59998e-07	FIRST_PASS
CM10	WEU0053	Gastric	1.51593	18269.1	18269.1	479.437	0.354547	2.3598	38.1053	4.70578e-05	6.16062e-07	ESTIMATED
CM10	WEU0053	Gastric	1.51593	18751.1	18751.1	119.495	0.270359	1.84223	156.92	4.76745e-05	1.52116e-07	ESTIMATED
CM10	WEU0053	Gastric	1.51593	19150.3	19150.3	76.9915	0.2726	1.89436	248.732	4.81793e-05	9.68206e-08	ESTIMATED
CM10	WEU0053	Gastric	1.51593	20592.5	20592.5	185.236	0.0814957	0.54705	111.169	4.99606e-05	2.24388e-07	ESTIMATED
CM10	WEU0053	Gastric	1.51593	20980.4	20980.4	130.082	0.262711	1.8338	161.287	5.0429e-05	1.56333e-07	ESTIMATED
CM10	WEU0053	Gastric	1.51593	21216.4	21216.4	127.316	0.490116	3.50553	166.644	5.07117e-05	1.52156e-07	ESTIMATED
CM10	WEU0053	Gastric	1.51593	21364.9	21364.9	18.8964	0.314518	2.28489	1130.63	5.08889e-05	2.25e-08	ESTIMATED
CM10	WEU0053	Gastric	1.51593	22355.1	22306.4	746.049	2.92712	23.5823	29.8994	5.19981e-05	8.65514e-07	FIRST_PASS
CM10	WEU0053	Gastric	1.51593	23650.4	23650.4	2386.33	1.17691	10.0761	9.91078	5.35417e-05	2.7414e-06	ESTIMATED
CM10	WEU0054	Gastric	1.34125	1507.55	1503.84	13.9883	59.0697	11.8864	107.507	1.35013e-05	6.27863e-08	FIRST_PASS
CM10	WEU0054	Gastric	1.34125	1733.86	1727.8	15.6872	58.6721	11.4172	110.141	1.44717e-05	6.56945e-08	FIRST_PASS
CM10	WEU0054	Gastric	1.34125	1754.42	1754.42	50.0603	18.0789	3.51031	35.0461	1.45827e-05	2.08051e-07	ESTIMATED
CM10	WEU0054	Gastric	1.34125	1954.32	1954.32	18.8837	20.2629	4.14547	103.493	1.53912e-05	7.44001e-08	ESTIMATED
CM10	WEU0054	Gastric	1.34125	1977.43	1977.43	117.418	12.8373	2.64223	16.841	1.54819e-05	4.59649e-07	ESTIMATED
CM10	WEU0054	Gastric	1.34125	1996.56	1991.05	16.3345	34.6908	7.16564	121.892	1.55351e-05	6.3738e-08	FIRST_PASS
CM10	WEU0054	Gastric	1.34125	2203.66	2201.4	28.438	34.6711	7.67518	77.4104	1.63351e-05	1.05373e-07	FIRST_PASS
CM10	WEU0054	Gastric	1.34125	2222.28	2222.28	38.3933	14.853	3.32434	57.8819	1.64124e-05	1.4225e-07	ESTIMATED
CM10	WEU0054	Gastric	1.34125	2240.07	2240.07	46.7418	10.415	2.35309	47.9243	1.6478e-05	1.71917e-07	ESTIMATED
CM10	WEU0054	Gastric	1.34125	2385.78	2387.01	11.6396	22.3803	5.47669	205.076	1.70098e-05	4.14989e-08	FIRST_PASS
CM10	WEU0054	Gastric	1.34125	2447.38	2443.12	18.4573	24.6835	6.23395	132.366	1.72086e-05	6.49782e-08	FIRST_PASS
CM10	WEU0054	Gastric	1.34125	2544.27	2544.27	141.347	1.78591	0.478236	18.0002	1.75612e-05	4.93246e-07	ESTIMATED
CM10	WEU0054	Gastric	1.34125	2578.52	2578.52	7.09732	2.24533	0.61362	363.309	1.7679e-05	2.43247e-08	ESTIMATED
CM10	WEU0054	Gastric	1.34125	2802.49	2799.6	18.0714	53.0542	16.6568	154.919	1.84213e-05	5.94477e-08	FIRST_PASS
CM10	WEU0054	Gastric	1.34125	2954.6	2954.6	6.55239	5.35641	1.77339	450.919	1.89244e-05	2.09925e-08	ESTIMATED
CM10	WEU0054	Gastric	1.34125	3005.81	3005.74	6.66402	8.63543	2.90125	451.041	1.90875e-05	2.1166e-08	FIRST_PASS
CM10	WEU0054	Gastric	1.34125	3031.71	3031.71	39.1167	4.11758	1.39377	77.5041	1.91698e-05	1.23993e-07	ESTIMATED
CM10	WEU0054	Gastric	1.34125	3101.32	3101.32	2.43697	0.462527	0.159754	1272.61	1.93886e-05	7.61822e-09	ESTIMATED
CM10	WEU0054	Gastric	1.34125	3360.52	3360.52	22.4024	0.733439	0.269344	150.007	2.01825e-05	6.72349e-08	ESTIMATED
CM10	WEU0054	Gastric	1.34125	3380.96	3380.96	3.75181	1.26212	0.462991	901.153	2.02438e-05	1.12297e-08	ESTIMATED
CM10	WEU0054	Gastric	1.34125	3454.61	3454.61	18.7882	4.66641	1.70519	183.871	2.04632e-05	5.55824e-08	ESTIMATED
CM10	WEU0054	Gastric	1.34125	3484.03	3484.03	5.33821	2.92729	1.06805	652.658	2.05501e-05	1.57457e-08	ESTIMATED
CM10	WEU0054	Gastric	1.34125	3590.56	3592.45	22.6044	10.9982	3.9905	158.927	2.08674e-05	6.56976e-08	FIRST_PASS
CM10	WEU0054	Gastric	1.34125	3722.3	3722.3	16.1643	5.71814	2.06125	230.279	2.12412e-05	4.61575e-08	ESTIMATED
CM10	WEU0054	Gastric	1.34125	3905.3	3905.3	15.3093	3.20416	1.14476	255.094	2.1757e-05	4.26657e-08	ESTIMATED
CM10	WEU0054	Gastric	1.34125	3933.25	3939.78	11.8931	5.19639	1.86706	331.265	2.18529e-05	3.29947e-08	SECOND_PASS
CM10	WEU0054	Gastric	1.34125	4037.3	4036.59	35.8656	10.7628	3.97561	112.548	2.21197e-05	9.82119e-08	FIRST_PASS
CM10	WEU0054	Gastric	1.34125	4065.01	4065.01	64.0832	2.92439	1.08912	63.4334	2.21975e-05	1.75475e-07	ESTIMATED
CM10	WEU0054	Gastric	1.34125	4146.61	4146.61	9.20503	1.90388	0.726122	450.472	2.24192e-05	2.48866e-08	ESTIMATED
CM10	WEU0054	Gastric	1.34125	4211.79	4211.79	14.2664	0.859328	0.334108	295.224	2.25947e-05	3.82954e-08	ESTIMATED
CM10	WEU0054	Gastric	1.34125	4376.6	4380.01	23.9022	44.2065	18.0818	183.247	2.30415e-05	6.28798e-08	FIRST_PASS
CM10	WEU0054	Gastric	1.34125	4489.19	4493.94	23.2141	15.6112	6.6148	193.587	2.33392e-05	6.02926e-08	FIRST_PASS
CM10	WEU0054	Gastric	1.34125	4555.41	4551.02	24.6766	22.8049	9.83826	184.427	2.3487e-05	6.36757e-08	FIRST_PASS
CM10	WEU0054	Gastric	1.34125	4585.09	4584.94	25.8922	36.649	15.9822	177.078	2.35744e-05	6.65688e-08	FIRST_PASS
CM10	WEU0054	Gastric	1.34125	4645.37	4637.83	27.6852	41.3616	18.3461	167.52	2.37099e-05	7.0766e-08	FIRST_PASS
CM10	WEU0054	Gastric	1.34125	4698.93	4698.33	25.9365	51.1849	23.154	181.147	2.38641e-05	6.58664e-08	FIRST_PASS
CM10	WEU0054	Gastric	1.34125	4767.2	4764.94	22.8904	462.583	213.898	208.163	2.40327e-05	5.77266e-08	FIRST_PASS
CM10	WEU0054	Gastric	1.34125	4908.07	4903.79	47.4535	21.0239	9.65652	103.339	2.43803e-05	1.17913e-07	FIRST_PASS
CM10	WEU0054	Gastric	1.34125	4976.17	4974.28	36.1429	39.9079	17.6366	137.628	2.45549e-05	8.91881e-08	FIRST_PASS
CM10	WEU0054	Gastric	1.34125	5084.44	5084.44	44.7459	2.15441	0.899396	113.629	2.48253e-05	1.09211e-07	ESTIMATED
CM10	WEU0054	Gastric	1.34125	5303.71	5303.71	30.7485	4.45547	1.67806	172.487	2.53549e-05	7.3452e-08	ESTIMATED
CM10	WEU0054	Gastric	1.34125	5402.2	5405.2	29.0867	12.372	4.46073	185.831	2.55964e-05	6.88607e-08	FIRST_PASS
CM10	WEU0054	Gastric	1.34125	5524.52	5514.04	24.9451	57.026	21.0205	221.047	2.58528e-05	5.84776e-08	FIRST_PASS
CM10	WEU0054	Gastric	1.34125	5619.57	5622.52	28.6508	9.60457	3.77392	196.243	2.61059e-05	6.65273e-08	FIRST_PASS
CM10	WEU0054	Gastric	1.34125	5709.09	5710.04	33.6962	19.659	8.15482	169.456	2.63083e-05	7.76201e-08	FIRST_PASS
CM10	WEU0054	Gastric	1.34125	5818.95	5820.13	25.5643	103.886	46.31	227.667	2.65607e-05	5.83325e-08	FIRST_PASS
CM10	WEU0054	Gastric	1.34125	5885.74	5885.74	233.101	5.89019	2.74699	25.2497	2.671e-05	5.32725e-07	ESTIMATED
CM10	WEU0054	Gastric	1.34125	6201.92	6201.92	100.039	3.51177	2.09717	61.995	2.7418e-05	2.20825e-07	ESTIMATED
CM10	WEU0054	Gastric	1.34125	6358.11	6358.11	87.4479	2.84595	1.95147	72.7075	2.77611e-05	1.91097e-07	ESTIMATED
CM10	WEU0054	Gastric	1.34125	6448.74	6448.74	75.2216	1.70164	1.2674	85.7298	2.79583e-05	1.6306e-07	ESTIMATED
CM10	WEU0054	Gastric	1.34125	6699.18	6689.11	15.7781	1.83196	1.76234	423.949	2.84746e-05	3.35853e-08	SECOND_PASS
CM10	WEU0054	Gastric	1.34125	7098.61	7098.61	33.614	0.733836	0.546324	211.18	2.93332e-05	6.94698e-08	ESTIMATED
CM10	WEU0054	Gastric	1.34125	7273.9	7273.9	43.0817	0.873548	0.587862	168.84	2.96932e-05	8.7887e-08	ESTIMATED
CM10	WEU0054	Gastric	1.34125	7327.57	7327.57	27.7785	2.68521	1.75581	263.786	2.98025e-05	5.6508e-08	ESTIMATED
CM10	WEU0054	Gastric	1.34125	7371.7	7371.7	16.9054	0.530615	0.339079	436.057	2.98921e-05	3.42868e-08	ESTIMATED
CM10	WEU0054	Gastric	1.34125	7498.7	7484.62	38.2493	4.49724	2.71684	195.68	3.01202e-05	7.69616e-08	SECOND_PASS
CM10	WEU0054	Gastric	1.34125	7686.69	7680.21	35.2755	15.1739	8.49665	217.721	3.05112e-05	7.0061e-08	FIRST_PASS
CM10	WEU0054	Gastric	1.34125	8039.87	8035.25	34.4552	33.7371	17.539	233.209	3.12085e-05	6.69029e-08	FIRST_PASS
CM10	WEU0054	Gastric	1.34125	8204.63	8207.69	68.7184	7.71586	3.87863	119.44	3.15416e-05	1.31898e-07	FIRST_PASS
CM10	WEU0054	Gastric	1.34125	8316.73	8316.73	44.6808	1.58622	0.781176	186.136	3.17504e-05	8.5266e-08	ESTIMATED
CM10	WEU0054	Gastric	1.34125	8414.87	8414.87	39.124	5.23976	2.53442	215.082	3.19372e-05	7.42221e-08	ESTIMATED
CM10	WEU0054	Gastric	1.34125	8485.43	8486.75	44.1979	11.1915	5.34377	192.017	3.20733e-05	8.34917e-08	FIRST_PASS
CM10	WEU0054	Gastric	1.34125	8577.95	8577.95	156.195	4.4929	2.11107	54.9184	3.22452e-05	2.94308e-07	ESTIMATED
CM10	WEU0054	Gastric	1.34125	8794.7	8794.7	23.1027	1.48027	0.710052	380.679	3.265e-05	4.28798e-08	ESTIMATED
CM10	WEU0054	Gastric	1.34125	8879.33	8867.38	37.7291	7.01279	3.44782	235.028	3.27847e-05	6.97358e-08	FIRST_PASS
CM10	WEU0054	Gastric	1.34125	9114.7	9117.08	80.4672	20.3304	10.9236	113.302	3.3243e-05	1.46645e-07	FIRST_PASS
CM10	WEU0054	Gastric	1.34125	9515.82	9515.82	123.75	3.27475	2.05963	76.8953	3.39622e-05	2.20834e-07	ESTIMATED
CM10	WEU0054	Gastric	1.34125	9618.76	9618.76	93.2683	5.04326	3.31598	103.13	3.41454e-05	1.65546e-07	ESTIMATED
CM10	WEU0054	Gastric	1.34125	9788.19	9790.58	78.6872	61.1899	43.5078	124.424	3.44491e-05	1.38377e-07	FIRST_PASS
CM10	WEU0054	Gastric	1.34125	9980.84	9980.84	500.938	19.5319	15.2496	19.9243	3.47822e-05	8.72857e-07	ESTIMATED
CM10	WEU0054	Gastric	1.34125	10079.5	10079.5	18.0301	13.7135	11.2761	559.037	3.49536e-05	3.125e-08	ESTIMATED
CM10	WEU0054	Gastric	1.34125	10117.5	10117.5	45.5501	8.47886	7.11728	222.119	3.50196e-05	7.875e-08	ESTIMATED
CM10	WEU0054	Gastric	1.34125	10232.2	10232.2	27.6017	7.34873	6.48885	370.71	3.52175e-05	4.75e-08	ESTIMATED
CM10	WEU0054	Gastric	1.34125	10309.1	10309.1	93.4224	6.38144	5.82392	110.35	3.53496e-05	1.6e-07	ESTIMATED
CM10	WEU0054	Gastric	1.34125	10447.6	10447.6	44.8175	3.98742	3.87188	233.115	3.55862e-05	7.625e-08	ESTIMATED
CM10	WEU0054	Gastric	1.34125	10570.1	10570.1	93.1478	3.27726	3.3719	113.476	3.57942e-05	1.575e-07	ESTIMATED
CM10	WEU0054	Gastric	1.34125	10681.8	10674.9	82.6079	4.62385	5.01151	129.223	3.59712e-05	1.39182e-07	SECOND_PASS
CM10	WEU0054	Gastric	1.34125	10806	10789.5	42.493	8.53142	9.81764	253.913	3.61638e-05	7.1202e-08	FIRST_PASS
CM10	WEU0054	Gastric	1.34125	10869.9	10869.9	64.1945	2.52656	3.03834	169.328	3.62983e-05	1.07183e-07	ESTIMATED
CM10	WEU0054	Gastric	1.34125	10982.1	10982.1	81.1211	1.89555	2.43166	135.379	3.64851e-05	1.34679e-07	ESTIMATED
CM10	WEU0054	Gastric	1.34125	11090.1	11090.1	6.80038	0.467619	0.640856	1630.81	3.66641e-05	1.12411e-08	ESTIMATED
CM10	WEU0054	Gastric	1.34125	11782.6	11766.4	58.5221	10.6975	27.0838	201.06	3.77655e-05	9.38946e-08	FIRST_PASS
CM10	WEU0054	Gastric	1.34125	11984.7	11984.7	346.248	2.41259	6.56409	34.613	3.81141e-05	5.5345e-07	ESTIMATED
CM10	WEU0054	Gastric	1.34125	12300	12300	112.267	1.00725	3.06767	109.56	3.86123e-05	1.75925e-07	ESTIMATED
CM10	WEU0054	Gastric	1.34125	12731.2	12731.2	476.719	-0.0458891	-0.166544	26.706	3.92833e-05	7.2875e-07	ESTIMATED
CM10	WEU0054	Gastric	1.34125	13373.5	13400.4	87.7839	2.0772	9.49703	152.652	4.03024e-05	1.31996e-07	FIRST_PASS
CM10	WEU0054	Gastric	1.34125	13803	13767.4	30.2366	0.386242	1.87085	455.325	4.08507e-05	4.48655e-08	SECOND_PASS
CM10	WEU0054	Gastric	1.34125	13913.6	13913.6	142.09	-0.0153822	-0.0762953	97.9209	4.1067e-05	2.1e-07	ESTIMATED
CM10	WEU0054	Gastric	1.34125	14136.2	14136.2	34.9178	0.0810316	0.414704	404.842	4.13942e-05	5.11179e-08	ESTIMATED
CM10	WEU0054	Gastric	1.34125	14724.3	14724.3	90.2455	0.403579	2.06088	163.158	4.22464e-05	1.29538e-07	ESTIMATED
CM10	WEU0054	Gastric	1.34125	15152.9	15148.6	124.775	0.508536	2.78679	121.408	4.28508e-05	1.76241e-07	FIRST_PASS
CM10	WEU0054	Gastric	1.34125	15310.6	15310.6	468.882	0.135877	0.765782	32.6534	4.30793e-05	6.6253e-07	ESTIMATED
CM10	WEU0054	Gastric	1.34125	15864.9	15864.9	104.742	0.0265469	0.165142	151.466	4.38522e-05	1.44571e-07	ESTIMATED
CM10	WEU0054	Gastric	1.34125	16033.6	16033.6	49.3085	0.0784983	0.498888	325.169	4.40847e-05	6.77482e-08	ESTIMATED
CM10	WEU0054	Gastric	1.34125	16672.7	16672.7	142.02	3.88482	26.8652	117.397	4.49548e-05	1.91466e-07	ESTIMATED
CM10	WEU0054	Gastric	1.34125	16824.4	16829.2	91.4703	16.0915	113.703	183.985	4.51652e-05	1.22742e-07	FIRST_PASS
CM10	WEU0054	Gastric	1.34125	16960.1	16972.6	95.2453	34.5172	248.844	178.198	4.53572e-05	1.2724e-07	FIRST_PASS
CM10	WEU0054	Gastric	1.34125	17122.2	17122.2	622.391	15.2646	112.415	27.5103	4.55567e-05	8.28787e-07	ESTIMATED
CM10	WEU0054	Gastric	1.34125	17164.7	17169.3	149.4	17.4582	129.444	114.921	4.56194e-05	1.98481e-07	FIRST_PASS
CM10	WEU0054	Gastric	1.34125	17320.2	17323.5	86.043	10.5273	79.8259	201.335	4.58238e-05	1.1375e-07	FIRST_PASS
CM10	WEU0054	Gastric	1.34125	17500.5	17508.6	70.3127	7.71937	60.1653	249.01	4.60679e-05	9.25e-08	FIRST_PASS
CM10	WEU0054	Gastric	1.34125	17650.4	17635	595.973	6.4238	51.0345	29.5902	4.62339e-05	7.81237e-07	FIRST_PASS
CM10	WEU0054	Gastric	1.34125	18111.6	18111.6	28.9976	2.74575	23.5117	624.59	4.68545e-05	3.75e-08	ESTIMATED
CM10	WEU0054	Gastric	1.34125	18178.6	18178.6	56.1795	2.66401	23.0622	323.58	4.69411e-05	7.25e-08	ESTIMATED
CM10	WEU0054	Gastric	1.34125	18269.1	18269.1	691.96	2.19833	19.3166	26.402	4.70578e-05	8.9118e-07	ESTIMATED
CM10	WEU0054	Gastric	1.34125	18751.1	18751.1	223.719	1.01855	9.72149	83.8153	4.76745e-05	2.8375e-07	ESTIMATED
CM10	WEU0054	Gastric	1.34125	19150.3	19150.3	663.304	0.516243	5.30129	28.871	4.81793e-05	8.34389e-07	ESTIMATED
CM10	WEU0054	Gastric	1.34125	20592.5	20618.4	112.154	3.19718	31.1226	183.84	4.9992e-05	1.35959e-07	FIRST_PASS
CM10	WEU0054	Gastric	1.34125	20980.4	20980.4	1133.57	0.261105	2.72812	18.5082	5.0429e-05	1.36234e-06	ESTIMATED
CM10	WEU0054	Gastric	1.34125	21216.4	21216.4	36.6092	0.286056	3.13772	579.537	5.07117e-05	4.375e-08	ESTIMATED
CM10	WEU0054	Gastric	1.34125	21364.9	21364.9	204.644	0.292172	3.30809	104.4	5.08889e-05	2.43721e-07	ESTIMATED
CM10	WEU0054	Gastric	1.34125	22355.1	22337.4	261.576	0.644498	5.83231	85.3955	5.20342e-05	3.04666e-07	SECOND_PASS
CM10	WEU0054	Gastric	1.34125	23650.4	23616.4	704.101	2.32276	21.4023	33.5412	5.35032e-05	7.97042e-07	FIRST_PASS
CM10	WEU0056	Gastric	2.04046	1507.55	1507.82	54.5897	102.005	8.78716	27.6209	1.35191e-05	2.44726e-07	SECOND_PASS
CM10	WEU0056	Gastric	2.04046	1733.86	1733.86	103.415	46.3297	3.70854	16.766	1.44971e-05	4.32335e-07	ESTIMATED
CM10	WEU0056	Gastric	2.04046	1754.42	1753.19	78.0969	54.8121	4.36209	22.4489	1.45776e-05	3.25646e-07	FIRST_PASS
CM10	WEU0056	Gastric	2.04046	1954.32	1954.32	15.1548	16.5997	1.51	128.957	1.53912e-05	5.96755e-08	ESTIMATED
CM10	WEU0056	Gastric	2.04046	1977.43	1981.4	21.7933	40.9746	3.81953	90.918	1.54974e-05	8.52717e-08	FIRST_PASS
CM10	WEU0056	Gastric	2.04046	1996.56	1996.56	66.4494	28.1335	2.65918	30.0463	1.55566e-05	2.58877e-07	ESTIMATED
CM10	WEU0056	Gastric	2.04046	2203.66	2203.66	19.4243	12.9495	1.50345	113.448	1.63435e-05	7.20015e-08	ESTIMATED
CM10	WEU0056	Gastric	2.04046	2222.28	2222.28	63.0659	11.8425	1.40298	35.2374	1.64124e-05	2.31595e-07	ESTIMATED
CM10	WEU0056	Gastric	2.04046	2240.07	2244.9	21.9636	22.6582	2.7522	102.21	1.64957e-05	8.07166e-08	FIRST_PASS
CM10	WEU0056	Gastric	2.04046	2385.78	2385.78	10.3463	3.66416	0.511489	230.592	1.70055e-05	3.68509e-08	ESTIMATED
CM10	WEU0056	Gastric	2.04046	2447.38	2447.38	8.99723	7.20981	1.03652	272.015	1.72236e-05	3.16603e-08	ESTIMATED
CM10	WEU0056	Gastric	2.04046	2544.27	2544.27	86.5972	1.80861	0.272629	29.3805	1.75612e-05	3.01426e-07	ESTIMATED
CM10	WEU0056	Gastric	2.04046	2578.52	2578.52	2.91968	-0.790841	-0.121263	883.151	1.7679e-05	1.00059e-08	ESTIMATED
CM10	WEU0056	Gastric	2.04046	2802.49	2802.49	28.3846	2.04461	0.352212	98.7329	1.84308e-05	9.35202e-08	ESTIMATED
CM10	WEU0056	Gastric	2.04046	2954.6	2954.6	23.0168	6.87247	1.24456	128.367	1.89244e-05	7.37393e-08	ESTIMATED
CM10	WEU0056	Gastric	2.04046	3005.81	3005.81	2.05396	3.75151	0.688046	1463.42	1.90877e-05	6.52147e-09	ESTIMATED
CM10	WEU0056	Gastric	2.04046	3031.71	3029.64	20.8018	11.5457	2.13011	145.643	1.91632e-05	6.57869e-08	SECOND_PASS
CM10	WEU0056	Gastric	2.04046	3101.32	3101.32	3.20312	1.48662	0.279222	968.217	1.93886e-05	1.00145e-08	ESTIMATED
CM10	WEU0056	Gastric	2.04046	3360.52	3360.52	139.931	-1.26324	-0.258535	24.0156	2.01825e-05	4.225e-07	ESTIMATED
CM10	WEU0056	Gastric	2.04046	3380.96	3386.09	5.67706	8.3764	1.73682	596.451	2.02592e-05	1.69792e-08	SECOND_PASS
CM10	WEU0056	Gastric	2.04046	3454.61	3455.92	17.5441	15.3002	3.2896	196.985	2.0467e-05	5.19452e-08	FIRST_PASS
CM10	WEU0056	Gastric	2.04046	3484.03	3484.03	46.5505	4.44762	0.970581	74.8441	2.05501e-05	1.37734e-07	ESTIMATED
CM10	WEU0056	Gastric	2.04046	3590.56	3590.56	13.7314	3.2858	0.759765	261.485	2.08619e-05	3.9912e-08	ESTIMATED
CM10	WEU0056	Gastric	2.04046	3722.3	3719.29	13.995	7.79959	1.94094	265.758	2.12326e-05	3.99776e-08	SECOND_PASS
CM10	WEU0056	Gastric	2.04046	3905.3	3905.3	13.8917	1.7169	0.422376	281.125	2.1757e-05	3.8713e-08	ESTIMATED
CM10	WEU0056	Gastric	2.04046	3933.25	3933.25	34.7505	6.31859	1.53628	113.185	2.18348e-05	9.63409e-08	ESTIMATED
CM10	WEU0056	Gastric	2.04046	4037.3	4037.3	17.062	3.16968	0.738801	236.625	2.21217e-05	4.67241e-08	ESTIMATED
CM10	WEU0056	Gastric	2.04046	4065.01	4065.01	1.41582	0.55966	0.129038	2871.14	2.21975e-05	3.86563e-09	ESTIMATED
CM10	WEU0056	Gastric	2.04046	4146.61	4146.61	41.0574	3.99478	0.892846	100.995	2.24192e-05	1.10854e-07	ESTIMATED
CM10	WEU0056	Gastric	2.04046	4211.79	4211.79	2.73033	1.43536	0.31321	1542.59	2.25947e-05	7.32443e-09	ESTIMATED
CM10	WEU0056	Gastric	2.04046	4376.6	4383.49	22.7827	43.9469	9.03401	192.404	2.30506e-05	5.99142e-08	FIRST_PASS
CM10	WEU0056	Gastric	2.04046	4489.19	4493.78	23.6257	15.6409	3.10165	190.207	2.33388e-05	6.13536e-08	FIRST_PASS
CM10	WEU0056	Gastric	2.04046	4555.41	4555.13	23.7852	20.7682	4.03978	191.511	2.34976e-05	6.13635e-08	FIRST_PASS
CM10	WEU0056	Gastric	2.04046	4585.09	4585.09	69.3805	9.07264	1.74856	66.0862	2.35747e-05	1.78717e-07	ESTIMATED
CM10	WEU0056	Gastric	2.04046	4645.37	4640.41	21.6051	12.6596	2.39934	214.783	2.37165e-05	5.52047e-08	SECOND_PASS
CM10	WEU0056	Gastric	2.04046	4698.93	4698.93	171.486	4.53881	0.845459	27.4012	2.38656e-05	4.32273e-07	ESTIMATED
CM10	WEU0056	Gastric	2.04046	4767.2	4768.82	23.0988	237.232	44.4815	206.453	2.40424e-05	5.82345e-08	FIRST_PASS
CM10	WEU0056	Gastric	2.04046	4908.07	4908.07	137.971	3.19044	0.621279	35.5732	2.43909e-05	3.40759e-07	ESTIMATED
CM10	WEU0056	Gastric	2.04046	4976.17	4978.73	41.688	18.5301	3.67962	119.428	2.45659e-05	1.0278e-07	FIRST_PASS
CM10	WEU0056	Gastric	2.04046	5084.44	5084.44	27.3198	6.22749	1.27391	186.108	2.48253e-05	6.66599e-08	ESTIMATED
CM10	WEU0056	Gastric	2.04046	5303.71	5305.98	25.1236	41.8112	9.12017	211.195	2.53604e-05	6.00466e-08	FIRST_PASS
CM10	WEU0056	Gastric	2.04046	5402.2	5402.2	28.9504	12.1415	2.72573	186.602	2.55893e-05	6.8572e-08	ESTIMATED
CM10	WEU0056	Gastric	2.04046	5524.52	5516.07	32.4459	29.2677	6.84178	170.008	2.58576e-05	7.60577e-08	FIRST_PASS
CM10	WEU0056	Gastric	2.04046	5619.57	5619.57	161.72	7.79684	1.93051	34.7487	2.6099e-05	3.77599e-07	ESTIMATED
CM10	WEU0056	Gastric	2.04046	5709.09	5715.19	47.1421	67.162	17.5823	121.233	2.63201e-05	1.08535e-07	FIRST_PASS
CM10	WEU0056	Gastric	2.04046	5818.95	5818.95	322.16	12.3652	3.44972	18.0623	2.6558e-05	7.35177e-07	ESTIMATED
CM10	WEU0056	Gastric	2.04046	5885.74	5885.74	165.134	12.6733	3.69058	35.6421	2.671e-05	3.74697e-07	ESTIMATED
CM10	WEU0056	Gastric	2.04046	6201.92	6201.92	64.1119	5.15849	1.88746	96.7358	2.7418e-05	1.41716e-07	ESTIMATED
CM10	WEU0056	Gastric	2.04046	6358.11	6358.11	47.5748	2.53438	1.05349	133.645	2.77611e-05	1.03923e-07	ESTIMATED
CM10	WEU0056	Gastric	2.04046	6448.74	6448.74	58.4066	3.10634	1.37699	110.411	2.79583e-05	1.26693e-07	ESTIMATED
CM10	WEU0056	Gastric	2.04046	6699.18	6699.18	14.2674	1.39031	0.752633	469.546	2.8496e-05	3.03458e-08	ESTIMATED
CM10	WEU0056	Gastric	2.04046	7098.61	7098.61	128.225	1.78746	1.24095	55.3605	2.93332e-05	2.65707e-07	ESTIMATED
CM10	WEU0056	Gastric	2.04046	7273.9	7273.9	31.4553	0.970933	0.691385	231.246	2.96932e-05	6.4191e-08	ESTIMATED
CM10	WEU0056	Gastric	2.04046	7327.57	7329.74	16.6731	2.92966	2.10323	439.615	2.98069e-05	3.39058e-08	SECOND_PASS
CM10	WEU0056	Gastric	2.04046	7371.7	7371.7	41.5336	0.925883	0.668797	177.488	2.98921e-05	8.42356e-08	ESTIMATED
CM10	WEU0056	Gastric	2.04046	7498.7	7498.7	21.2761	0.814716	0.599622	352.447	3.01485e-05	4.27965e-08	ESTIMATED
CM10	WEU0056	Gastric	2.04046	7686.69	7677.57	43.9849	5.32258	4.0234	174.55	3.0506e-05	8.73655e-08	FIRST_PASS
CM10	WEU0056	Gastric	2.04046	8039.87	8044.14	69.5608	5.75541	4.15605	115.642	3.12257e-05	1.34941e-07	FIRST_PASS
CM10	WEU0056	Gastric	2.04046	8204.63	8202.92	34.1562	8.45294	5.98525	240.159	3.15324e-05	6.56546e-08	FIRST_PASS
CM10	WEU0056	Gastric	2.04046	8316.73	8317.21	59.6809	5.30106	3.70211	139.361	3.17513e-05	1.14048e-07	SECOND_PASS
CM10	WEU0056	Gastric	2.04046	8414.87	8414.87	67.912	2.46987	1.70506	123.908	3.19372e-05	1.28938e-07	ESTIMATED
CM10	WEU0056	Gastric	2.04046	8485.43	8485.43	59.1619	1.75536	1.20188	143.427	3.20708e-05	1.11851e-07	ESTIMATED
CM10	WEU0056	Gastric	2.04046	8577.95	8577.95	198.72	2.32088	1.57226	43.166	3.22452e-05	3.72645e-07	ESTIMATED
CM10	WEU0056	Gastric	2.04046	8794.7	8794.43	27.8842	10.2302	6.76445	315.391	3.26495e-05	5.17617e-08	FIRST_PASS
CM10	WEU0056	Gastric	2.04046	8879.33	8879.33	122.579	2.82719	1.85215	72.4376	3.28067e-05	2.27121e-07	ESTIMATED
CM10	WEU0056	Gastric	2.04046	9114.7	9086.16	65.2254	7.06441	4.52713	139.304	3.31866e-05	1.19022e-07	FIRST_PASS
CM10	WEU0056	Gastric	2.04046	9515.82	9515.82	54.342	1.53855	0.80885	175.11	3.39622e-05	9.69918e-08	ESTIMATED
CM10	WEU0056	Gastric	2.04046	9618.76	9618.76	79.1695	1.68959	0.858446	121.496	3.41454e-05	1.40541e-07	ESTIMATED
CM10	WEU0056	Gastric	2.04046	9788.19	9779.82	42.4986	4.08799	2.03198	230.121	3.44301e-05	7.48004e-08	SECOND_PASS
CM10	WEU0056	Gastric	2.04046	9980.84	9980.84	73.9957	1.80535	0.932329	134.884	3.47822e-05	1.28953e-07	ESTIMATED
CM10	WEU0056	Gastric	2.04046	10079.5	10075.8	28.3984	17.8599	9.56803	354.801	3.49472e-05	4.92509e-08	FIRST_PASS
CM10	WEU0056	Gastric	2.04046	10117.5	10117.5	143.061	4.02133	2.19021	70.7219	3.50196e-05	2.47586e-07	ESTIMATED
CM10	WEU0056	Gastric	2.04046	10232.2	10232.2	179.373	7.43198	4.24106	57.0446	3.52175e-05	3.07662e-07	ESTIMATED
CM10	WEU0056	Gastric	2.04046	10309.1	10335.5	175.739	7.78189	4.639	58.8115	3.53947e-05	3.01438e-07	FIRST_PASS
CM10	WEU0056	Gastric	2.04046	10447.6	10447.6	85.9343	6.03308	3.77885	121.577	3.55862e-05	1.4625e-07	ESTIMATED
CM10	WEU0056	Gastric	2.04046	10570.1	10570.1	45.0741	4.53961	3.00906	234.504	3.57942e-05	7.625e-08	ESTIMATED
CM10	WEU0056	Gastric	2.04046	10681.8	10681.8	40.8299	3.28901	2.30183	261.618	3.59829e-05	6.875e-08	ESTIMATED
CM10	WEU0056	Gastric	2.04046	10806	10806	81.4836	4.75921	3.54963	132.615	3.61913e-05	1.36452e-07	ESTIMATED
CM10	WEU0056	Gastric	2.04046	10869.9	10863.2	50.3522	16.739	12.8733	215.745	3.62871e-05	8.40879e-08	FIRST_PASS
CM10	WEU0056	Gastric	2.04046	10982.1	10982.1	451.581	5.66178	4.65377	24.3192	3.64851e-05	7.50129e-07	ESTIMATED
CM10	WEU0056	Gastric	2.04046	11090.1	11102.7	112.485	7.82676	6.91313	98.7036	3.66849e-05	1.85918e-07	FIRST_PASS
CM10	WEU0056	Gastric	2.04046	11782.6	11758.6	97.9102	23.2946	27.1669	120.095	3.77529e-05	1.56995e-07	FIRST_PASS
CM10	WEU0056	Gastric	2.04046	11984.7	11984.7	384.445	9.38085	11.4745	31.1739	3.81141e-05	6.13279e-07	ESTIMATED
CM10	WEU0056	Gastric	2.04046	12300	12300	689.114	2.49921	3.27772	17.849	3.86123e-05	1.0675e-06	ESTIMATED
CM10	WEU0056	Gastric	2.04046	12731.2	12719.1	125.815	4.76798	6.90632	101.094	3.92646e-05	1.93981e-07	FIRST_PASS
CM10	WEU0056	Gastric	2.04046	13373.5	13375.4	316.592	6.18629	10.6692	42.2481	4.02649e-05	4.76529e-07	SECOND_PASS
CM10	WEU0056	Gastric	2.04046	13803	13818.7	118.76	6.6888	13.2012	116.359	4.09267e-05	1.75864e-07	SECOND_PASS
CM10	WEU0056	Gastric	2.04046	13913.6	13934.8	369.383	10.6677	21.8729	37.7247	4.10983e-05	5.44714e-07	FIRST_PASS
CM10	WEU0056	Gastric	2.04046	14136.2	14136.2	474.976	5.67696	12.4764	29.7619	4.13942e-05	6.99294e-07	ESTIMATED
CM10	WEU0056	Gastric	2.04046	14724.3	14721.8	169.167	1.36753	3.78601	87.0256	4.22429e-05	2.42635e-07	SECOND_PASS
CM10	WEU0056	Gastric	2.04046	15152.9	15152.9	3.59115	0.0614288	0.181498	4219.52	4.28569e-05	5.07842e-09	ESTIMATED
CM10	WEU0056	Gastric	2.04046	15310.6	15310.6	88.082	-0.148364	-0.44736	173.822	4.30793e-05	1.2375e-07	ESTIMATED
CM10	WEU0056	Gastric	2.04046	15864.9	15864.9	59.1063	1.18854	3.60388	268.413	4.38522e-05	8.16672e-08	FIRST_PASS
CM10	WEU0056	Gastric	2.04046	16033.6	16033.6	124.215	0.20136	0.654635	129.08	4.40847e-05	1.70538e-07	ESTIMATED
CM10	WEU0056	Gastric	2.04046	16672.7	16672.7	51.6094	0.604356	2.39345	323.055	4.49548e-05	6.95775e-08	ESTIMATED
CM10	WEU0056	Gastric	2.04046	16824.4	16824.4	267.265	0.992825	3.9843	62.9503	4.51588e-05	3.58687e-07	ESTIMATED
CM10	WEU0056	Gastric	2.04046	16960.1	16969.4	138.883	2.49873	10.1564	122.185	4.5353e-05	1.85514e-07	FIRST_PASS
CM10	WEU0056	Gastric	2.04046	17122.2	17122.2	203.62	1.391	5.73112	84.089	4.55567e-05	2.7125e-07	ESTIMATED
CM10	WEU0056	Gastric	2.04046	17164.7	17173.1	77.1437	1.73999	7.20172	222.612	4.56244e-05	1.025e-07	SECOND_PASS
CM10	WEU0056	Gastric	2.04046	17320.2	17298.9	83.6122	2.45113	10.2604	206.894	4.57912e-05	1.10663e-07	FIRST_PASS
CM10	WEU0056	Gastric	2.04046	17500.5	17500.5	158.391	1.50928	6.43442	110.489	4.60573e-05	2.0875e-07	ESTIMATED
CM10	WEU0056	Gastric	2.04046	17650.4	17650.4	152.242	1.33886	5.78691	115.937	4.62541e-05	1.9948e-07	ESTIMATED
CM10	WEU0056	Gastric	2.04046	18111.6	18113.6	166.763	1.06408	4.80297	108.619	4.68571e-05	2.15515e-07	FIRST_PASS
CM10	WEU0056	Gastric	2.04046	18178.6	18178.6	274.866	0.736643	3.34564	66.1362	4.69411e-05	3.54882e-07	ESTIMATED
CM10	WEU0056	Gastric	2.04046	18269.1	18269.1	86.4433	0.740623	3.39298	211.342	4.70578e-05	1.1125e-07	ESTIMATED
CM10	WEU0056	Gastric	2.04046	18751.1	18751.1	298.07	0.464899	2.23246	62.9085	4.76745e-05	3.7892e-07	ESTIMATED
CM10	WEU0056	Gastric	2.04046	19150.3	19139.3	102.39	0.879807	4.44154	186.925	4.81656e-05	1.28785e-07	FIRST_PASS
CM10	WEU0056	Gastric	2.04046	20592.5	20599.4	270.351	0.66212	3.82578	76.1948	4.99689e-05	3.27454e-07	SECOND_PASS
CM10	WEU0056	Gastric	2.04046	20980.4	20980.4	275.506	0.94772	5.36712	76.1523	5.0429e-05	3.31106e-07	ESTIMATED
CM10	WEU0056	Gastric	2.04046	21216.4	21216.4	169.325	1.21724	6.81023	125.3	5.07117e-05	2.025e-07	ESTIMATED
CM10	WEU0056	Gastric	2.04046	21364.9	21364.9	66.1464	1.17402	6.51909	322.994	5.08889e-05	7.875e-08	ESTIMATED
CM10	WEU0056	Gastric	2.04046	22355.1	22297	518.296	6.97301	37.9472	43.0198	5.19871e-05	6.02613e-07	FIRST_PASS
CM10	WEU0056	Gastric	2.04046	23650.4	23641.8	1199.99	5.24351	28.5353	19.7017	5.3532e-05	1.35856e-06	FIRST_PASS
CM10	WEU0062	Gastric	0.878782	1507.55	1507.55	68.7956	26.0753	7.79795	21.9134	1.35179e-05	3.08438e-07	ESTIMATED
CM10	WEU0062	Gastric	0.878782	1733.86	1733.86	91.1464	11.7783	3.28507	19.0228	1.44971e-05	3.80011e-07	ESTIMATED
CM10	WEU0062	Gastric	0.878782	1754.42	1759.83	52.2418	17.0338	4.7158	33.6863	1.46052e-05	2.16783e-07	FIRST_PASS
CM10	WEU0062	Gastric	0.878782	1954.32	1954.32	17.2773	5.10186	1.59007	113.115	1.53912e-05	6.80331e-08	ESTIMATED
CM10	WEU0062	Gastric	0.878782	1977.43	1977.43	63.1993	9.28793	2.93847	31.2888	1.54819e-05	2.46145e-07	ESTIMATED
CM10	WEU0062	Gastric	0.878782	1996.56	2002.63	39.6339	11.4184	3.67264	50.528	1.55802e-05	1.53927e-07	FIRST_PASS
CM10	WEU0062	Gastric	0.878782	2203.66	2203.21	15.7718	22.8479	8.31011	139.693	1.63419e-05	5.84741e-08	FIRST_PASS
CM10	WEU0062	Gastric	0.878782	2222.28	2222.28	60.3853	6.11175	2.22936	36.8016	1.64124e-05	2.22985e-07	ESTIMATED
CM10	WEU0062	Gastric	0.878782	2240.07	2240.07	30.8365	6.44122	2.35587	72.6433	1.6478e-05	1.13417e-07	ESTIMATED
CM10	WEU0062	Gastric	0.878782	2385.78	2385.78	9.6639	0.192787	0.0720737	246.875	1.70055e-05	3.44321e-08	ESTIMATED
CM10	WEU0062	Gastric	0.878782	2447.38	2446.2	17.3829	7.03861	2.65525	140.725	1.72195e-05	6.11659e-08	SECOND_PASS
CM10	WEU0062	Gastric	0.878782	2544.27	2544.27	15.4066	1.40471	0.537703	165.141	1.75612e-05	5.31984e-08	ESTIMATED
CM10	WEU0062	Gastric	0.878782	2578.52	2576.74	16.7174	8.13824	3.13023	154.135	1.76729e-05	5.73497e-08	FIRST_PASS
CM10	WEU0062	Gastric	0.878782	2802.49	2802.63	18.5767	20.5741	8.24665	150.868	1.84313e-05	6.10769e-08	FIRST_PASS
CM10	WEU0062	Gastric	0.878782	2954.6	2954.6	7.58601	1.27752	0.53941	389.479	1.89244e-05	2.42944e-08	ESTIMATED
CM10	WEU0062	Gastric	0.878782	3005.81	3005.81	9.84731	0.754794	0.324434	305.241	1.90877e-05	3.12694e-08	ESTIMATED
CM10	WEU0062	Gastric	0.878782	3031.71	3032.61	2.2354	3.83769	1.66515	1356.63	1.91726e-05	7.06608e-09	SECOND_PASS
CM10	WEU0062	Gastric	0.878782	3101.32	3101.32	6.81314	1.10063	0.489319	455.196	1.93886e-05	2.12975e-08	ESTIMATED
CM10	WEU0062	Gastric	0.878782	3360.52	3360.52	19.4176	2.88455	1.38407	173.065	2.01825e-05	5.83309e-08	ESTIMATED
CM10	WEU0062	Gastric	0.878782	3380.96	3380.96	15.4564	2.40696	1.15664	218.742	2.02438e-05	4.62509e-08	ESTIMATED
CM10	WEU0062	Gastric	0.878782	3454.61	3454.61	125.942	2.32128	1.12149	27.4302	2.04632e-05	3.69942e-07	ESTIMATED
CM10	WEU0062	Gastric	0.878782	3484.03	3484.81	34.1414	7.9003	3.82531	102.07	2.05524e-05	1.00667e-07	FIRST_PASS
CM10	WEU0062	Gastric	0.878782	3590.56	3590.56	13.0166	3.24918	1.58534	275.845	2.08619e-05	3.78145e-08	ESTIMATED
CM10	WEU0062	Gastric	0.878782	3722.3	3722.3	104.78	3.87428	1.90832	35.5249	2.12412e-05	2.975e-07	ESTIMATED
CM10	WEU0062	Gastric	0.878782	3905.3	3905.3	19.4388	2.45622	1.2257	200.902	2.1757e-05	5.41485e-08	ESTIMATED
CM10	WEU0062	Gastric	0.878782	3933.25	3933.25	28.7191	2.32974	1.16488	136.956	2.18348e-05	7.96953e-08	ESTIMATED
CM10	WEU0062	Gastric	0.878782	4037.3	4037.3	51.7926	5.01426	2.5256	77.9514	2.21217e-05	1.41562e-07	ESTIMATED
CM10	WEU0062	Gastric	0.878782	4065.01	4059.68	40.6265	7.71122	3.89013	99.927	2.21829e-05	1.11104e-07	FIRST_PASS
CM10	WEU0062	Gastric	0.878782	4146.61	4146.61	27.2992	1.57355	0.799008	151.895	2.24192e-05	7.38523e-08	ESTIMATED
CM10	WEU0062	Gastric	0.878782	4211.79	4211.79	13.7377	0.720914	0.371898	306.587	2.25947e-05	3.68462e-08	ESTIMATED
CM10	WEU0062	Gastric	0.878782	4376.6	4369.3	24.9076	29.2921	15.7082	175.42	2.30133e-05	6.55816e-08	FIRST_PASS
CM10	WEU0062	Gastric	0.878782	4489.19	4489.19	25.1992	2.43084	1.34335	178.148	2.33269e-05	6.55172e-08	ESTIMATED
CM10	WEU0062	Gastric	0.878782	4555.41	4555.41	70.92	3.53542	1.98691	64.2331	2.34983e-05	1.82406e-07	ESTIMATED
CM10	WEU0062	Gastric	0.878782	4585.09	4586.47	23.3829	14.8244	8.39778	196.147	2.35783e-05	6.00968e-08	FIRST_PASS
CM10	WEU0062	Gastric	0.878782	4645.37	4645.37	11.2582	1.59574	0.917776	412.62	2.37292e-05	2.87543e-08	ESTIMATED
CM10	WEU0062	Gastric	0.878782	4698.93	4699.49	15.1175	4.37472	2.5517	310.865	2.3867e-05	3.83945e-08	SECOND_PASS
CM10	WEU0062	Gastric	0.878782	4767.2	4766.38	26.2987	16.018	9.50832	181.24	2.40363e-05	6.63139e-08	FIRST_PASS
CM10	WEU0062	Gastric	0.878782	4908.07	4897.03	22.943	4.88267	3.0331	213.444	2.43635e-05	5.70779e-08	FIRST_PASS
CM10	WEU0062	Gastric	0.878782	4976.17	4984.76	15.4331	3.38972	2.18186	322.991	2.45807e-05	3.80449e-08	SECOND_PASS
CM10	WEU0062	Gastric	0.878782	5084.44	5084.44	127.263	-0.0880358	-0.0590714	39.9521	2.48253e-05	3.125e-07	ESTIMATED
CM10	WEU0062	Gastric	0.878782	5303.71	5315.39	31.0563	8.65755	6.43158	171.153	2.53829e-05	7.41525e-08	SECOND_PASS
CM10	WEU0062	Gastric	0.878782	5402.2	5407.13	35.8535	20.0179	15.5216	150.812	2.5601e-05	8.48779e-08	FIRST_PASS
CM10	WEU0062	Gastric	0.878782	5524.52	5515.86	28.3393	43.9636	33.6653	194.637	2.58571e-05	6.64234e-08	FIRST_PASS
CM10	WEU0062	Gastric	0.878782	5619.57	5619.57	386.002	3.37204	2.50525	14.5584	2.6099e-05	9.10733e-07	ESTIMATED
CM10	WEU0062	Gastric	0.878782	5709.09	5717.23	48.3037	5.22986	3.78043	118.36	2.63248e-05	1.11215e-07	FIRST_PASS
CM10	WEU0062	Gastric	0.878782	5818.95	5823.72	26.0367	12.2175	8.58067	223.674	2.65689e-05	5.9399e-08	FIRST_PASS
CM10	WEU0062	Gastric	0.878782	5885.74	5880.44	72.4617	5.04308	3.48947	81.1523	2.6698e-05	1.64298e-07	SECOND_PASS
CM10	WEU0062	Gastric	0.878782	6201.92	6201.92	58.0176	2.39666	1.57634	106.897	2.7418e-05	1.28122e-07	ESTIMATED
CM10	WEU0062	Gastric	0.878782	6358.11	6352.5	42.4177	3.13777	2.47226	149.76	2.77489e-05	9.264e-08	FIRST_PASS
CM10	WEU0062	Gastric	0.878782	6448.74	6448.74	50.0571	0.962465	0.866931	128.828	2.79583e-05	1.08446e-07	ESTIMATED
CM10	WEU0062	Gastric	0.878782	6699.18	6699.18	62.7276	0.465294	0.518622	106.798	2.8496e-05	1.33351e-07	ESTIMATED
CM10	WEU0062	Gastric	0.878782	7098.61	7097.76	27.8453	13.9431	14.2543	254.9	2.93315e-05	5.75e-08	SECOND_PASS
CM10	WEU0062	Gastric	0.878782	7273.9	7291.58	43.5051	17.6965	17.5377	167.603	2.97292e-05	8.875e-08	FIRST_PASS
CM10	WEU0062	Gastric	0.878782	7327.57	7327.57	497.969	13.9764	13.8103	14.7149	2.98025e-05	1.01493e-06	ESTIMATED
CM10	WEU0062	Gastric	0.878782	7371.7	7353.73	83.0135	25.8916	25.5297	88.5848	2.98557e-05	1.68469e-07	FIRST_PASS
CM10	WEU0062	Gastric	0.878782	7498.7	7463.17	100.22	19.5562	19.1138	74.4677	3.0077e-05	2.01947e-07	FIRST_PASS
CM10	WEU0062	Gastric	0.878782	7686.69	7680.39	40.6969	6.76479	6.49991	188.722	3.05116e-05	8.08471e-08	FIRST_PASS
CM10	WEU0062	Gastric	0.878782	8039.87	8036.19	34.3839	17.3401	16.22	233.719	3.12103e-05	6.67683e-08	FIRST_PASS
CM10	WEU0062	Gastric	0.878782	8204.63	8203.68	33.6751	14.5845	13.4771	243.613	3.15339e-05	6.47278e-08	FIRST_PASS
CM10	WEU0062	Gastric	0.878782	8316.73	8316.17	33.5667	11.1556	10.2261	247.751	3.17493e-05	6.40796e-08	FIRST_PASS
CM10	WEU0062	Gastric	0.878782	8414.87	8414.87	256.413	2.21816	2.01925	32.8176	3.19372e-05	4.83895e-07	ESTIMATED
CM10	WEU0062	Gastric	0.878782	8485.43	8473.95	32.0215	15.2867	13.8587	264.633	3.20491e-05	6.05625e-08	FIRST_PASS
CM10	WEU0062	Gastric	0.878782	8577.95	8588.08	33.1816	12.5767	11.3125	258.821	3.22642e-05	6.23395e-08	FIRST_PASS
CM10	WEU0062	Gastric	0.878782	8794.7	8794.7	244.666	1.2677	1.12446	35.9457	3.265e-05	4.5139e-07	ESTIMATED
CM10	WEU0062	Gastric	0.878782	8879.33	8866.53	35.7027	20.6496	18.2292	248.343	3.27831e-05	6.59989e-08	FIRST_PASS
CM10	WEU0062	Gastric	0.878782	9114.7	9143.43	38.0062	4.84217	3.95774	240.577	3.32911e-05	6.91815e-08	FIRST_PASS
CM10	WEU0062	Gastric	0.878782	9515.82	9515.82	77.8495	1.6909	1.25484	122.234	3.39622e-05	1.38924e-07	ESTIMATED
CM10	WEU0062	Gastric	0.878782	9618.76	9618.76	152.378	3.75834	2.65518	63.1245	3.41454e-05	2.70461e-07	ESTIMATED
CM10	WEU0062	Gastric	0.878782	9788.19	9788.19	172.156	6.76527	4.39988	56.8565	3.44448e-05	3.0291e-07	ESTIMATED
CM10	WEU0062	Gastric	0.878782	9980.84	9959.13	66.522	13.0534	7.86467	149.712	3.47443e-05	1.16037e-07	SECOND_PASS
CM10	WEU0062	Gastric	0.878782	10079.5	10084.4	105.587	17.4664	9.98882	95.5077	3.49621e-05	1.83033e-07	FIRST_PASS
CM10	WEU0062	Gastric	0.878782	10117.5	10117.5	393.365	11.768	6.64097	25.7205	3.50196e-05	6.80772e-07	ESTIMATED
CM10	WEU0062	Gastric	0.878782	10232.2	10221.2	107.511	20.4846	11.1026	95.0718	3.51985e-05	1.85e-07	FIRST_PASS
CM10	WEU0062	Gastric	0.878782	10309.1	10309.1	107.741	15.5144	8.13701	95.6844	3.53496e-05	1.85e-07	ESTIMATED
CM10	WEU0062	Gastric	0.878782	10447.6	10447.6	53.5287	18.7577	9.71425	195.178	3.55862e-05	9.125e-08	ESTIMATED
CM10	WEU0062	Gastric	0.878782	10570.1	10553.4	319.593	31.1968	16.9098	33.0215	3.57659e-05	5.41556e-07	FIRST_PASS
CM10	WEU0062	Gastric	0.878782	10681.8	10680.6	52.6741	65.3977	37.541	202.767	3.59808e-05	8.87243e-08	FIRST_PASS
CM10	WEU0062	Gastric	0.878782	10806	10809.8	73.6152	105.471	64.3859	146.842	3.61978e-05	1.23192e-07	FIRST_PASS
CM10	WEU0062	Gastric	0.878782	10869.9	10869.9	713.098	47.875	30.1098	15.2432	3.62983e-05	1.19064e-06	ESTIMATED
CM10	WEU0062	Gastric	0.878782	10982.1	10982.1	58.7597	34.602	23.0595	186.898	3.64851e-05	9.75e-08	ESTIMATED
CM10	WEU0062	Gastric	0.878782	11090.1	11090.1	387.544	22.3199	15.7756	28.6165	3.66641e-05	6.40612e-07	ESTIMATED
CM10	WEU0062	Gastric	0.878782	11782.6	11759	65.9522	47.521	53.2062	178.297	3.77537e-05	1.05824e-07	FIRST_PASS
CM10	WEU0062	Gastric	0.878782	11984.7	11984.7	211.7	14.635	20.3107	56.6116	3.81141e-05	3.36628e-07	ESTIMATED
CM10	WEU0062	Gastric	0.878782	12300	12300	256.142	2.61634	5.39597	48.0202	3.86123e-05	4.02042e-07	ESTIMATED
CM10	WEU0062	Gastric	0.878782	12731.2	12731.2	104.395	0.311769	0.734759	121.952	3.92833e-05	1.61218e-07	ESTIMATED
CM10	WEU0062	Gastric	0.878782	13373.5	13381.9	114.098	3.45548	10.319	117.284	4.02747e-05	1.71775e-07	FIRST_PASS
CM10	WEU0062	Gastric	0.878782	13803	13803	1177.22	1.13986	4.0984	11.7251	4.09035e-05	1.74427e-06	ESTIMATED
CM10	WEU0062	Gastric	0.878782	13913.6	13913.6	105.712	0.804428	3.05432	131.618	4.1067e-05	1.56008e-07	ESTIMATED
CM10	WEU0062	Gastric	0.878782	14136.2	14136.2	46.2296	0.224704	0.960893	305.782	4.13942e-05	6.77031e-08	ESTIMATED
CM10	WEU0062	Gastric	0.878782	14724.3	14724.3	38.0527	0.137252	0.598384	386.944	4.22464e-05	5.45994e-08	ESTIMATED
CM10	WEU0062	Gastric	0.878782	15152.9	15152.9	169.323	-0.0252248	-0.114902	89.4909	4.28569e-05	2.4e-07	ESTIMATED
CM10	WEU0062	Gastric	0.878782	15310.6	15310.6	137.742	-0.0291725	-0.139165	111.154	4.30793e-05	1.9375e-07	ESTIMATED
CM10	WEU0062	Gastric	0.878782	15864.9	15863.6	64.5812	11.4169	53.0035	245.639	4.38505e-05	8.92348e-08	FIRST_PASS
CM10	WEU0062	Gastric	0.878782	16033.6	16033.6	392.469	1.56401	7.24359	40.8531	4.40847e-05	5.41076e-07	ESTIMATED
CM10	WEU0062	Gastric	0.878782	16672.7	16672.7	127.624	0.495946	2.27669	130.639	4.49548e-05	1.72057e-07	ESTIMATED
CM10	WEU0062	Gastric	0.878782	16824.4	16824.4	115.625	1.51054	6.92	145.508	4.51588e-05	1.55176e-07	ESTIMATED
CM10	WEU0062	Gastric	0.878782	16960.1	16965	102.111	3.06897	14.0326	166.142	4.53472e-05	1.36471e-07	FIRST_PASS
CM10	WEU0062	Gastric	0.878782	17122.2	17122.2	191.497	2.25215	10.276	89.412	4.55567e-05	2.55e-07	ESTIMATED
CM10	WEU0062	Gastric	0.878782	17164.7	17170.2	155.39	2.53167	11.544	110.498	4.56206e-05	2.0625e-07	FIRST_PASS
CM10	WEU0062	Gastric	0.878782	17320.2	17320.2	68.9845	1.9827	9.02273	251.074	4.58195e-05	9.125e-08	ESTIMATED
CM10	WEU0062	Gastric	0.878782	17500.5	17500.5	57.8995	1.729	7.84948	302.256	4.60573e-05	7.625e-08	ESTIMATED
CM10	WEU0062	Gastric	0.878782	17650.4	17650.4	620.348	1.96119	8.88608	28.4525	4.62541e-05	8.075e-07	ESTIMATED
CM10	WEU0062	Gastric	0.878782	18111.6	18108.7	80.166	4.86413	21.9084	225.89	4.68507e-05	1.03703e-07	FIRST_PASS
CM10	WEU0062	Gastric	0.878782	18178.6	18159.5	43.5558	4.61468	20.7713	416.925	4.69165e-05	5.625e-08	SECOND_PASS
CM10	WEU0062	Gastric	0.878782	18269.1	18274.9	94.2134	4.40317	19.7901	193.973	4.70652e-05	1.2125e-07	FIRST_PASS
CM10	WEU0062	Gastric	0.878782	18751.1	18751.1	141.858	1.31603	5.87935	132.182	4.76745e-05	1.8e-07	ESTIMATED
CM10	WEU0062	Gastric	0.878782	19150.3	19150.3	541.894	1.29604	5.7614	35.3395	4.81793e-05	6.81664e-07	ESTIMATED
CM10	WEU0062	Gastric	0.878782	20592.5	20589.3	93.0053	1.67374	15.582	221.377	4.99567e-05	1.12812e-07	FIRST_PASS
CM10	WEU0062	Gastric	0.878782	20980.4	20997.8	189.533	1.11406	10.1072	110.787	5.04498e-05	2.27547e-07	FIRST_PASS
CM10	WEU0062	Gastric	0.878782	21216.4	21216.4	787.453	0.558136	4.99603	26.943	5.07117e-05	9.48364e-07	ESTIMATED
CM10	WEU0062	Gastric	0.878782	21364.9	21364.9	386.613	0.386382	3.42764	55.2618	5.08889e-05	4.60435e-07	ESTIMATED
CM10	WEU0062	Gastric	0.878782	22355.1	22355.1	325.909	0.966755	10.4689	68.593	5.20549e-05	3.79447e-07	ESTIMATED
CM10	WEU0062	Gastric	0.878782	23650.4	23640.8	850.941	13.8514	149.995	27.782	5.35309e-05	9.60311e-07	FIRST_PASS
CM10	WEU0064	Gastric	0.801911	1507.55	1507.56	22.3873	23.2219	8.59565	67.3398	1.35179e-05	1.00371e-07	SECOND_PASS
CM10	WEU0064	Gastric	0.801911	1733.86	1731.61	44.2251	19.2763	6.93152	39.1545	1.44877e-05	1.85006e-07	SECOND_PASS
CM10	WEU0064	Gastric	0.801911	1754.42	1753.78	47.9091	19.4673	7.05927	36.6064	1.45801e-05	1.99147e-07	FIRST_PASS
CM10	WEU0064	Gastric	0.801911	1954.32	1957.47	24.9645	12.7086	4.98304	78.41	1.54035e-05	9.82243e-08	FIRST_PASS
CM10	WEU0064	Gastric	0.801911	1977.43	1977.43	102.716	9.93931	3.92757	19.2514	1.54819e-05	4.02097e-07	ESTIMATED
CM10	WEU0064	Gastric	0.801911	1996.56	1992.24	56.1557	12.3822	4.92124	35.4771	1.55398e-05	2.19011e-07	SECOND_PASS
CM10	WEU0064	Gastric	0.801911	2203.66	2203.66	42.6623	5.66291	2.44753	51.6534	1.63435e-05	1.58203e-07	ESTIMATED
CM10	WEU0064	Gastric	0.801911	2222.28	2222.28	10.4949	6.44878	2.80275	211.748	1.64124e-05	3.875e-08	ESTIMATED
CM10	WEU0064	Gastric	0.801911	2240.07	2240.07	39.1038	6.48359	2.83037	57.2852	1.6478e-05	1.43824e-07	ESTIMATED
CM10	WEU0064	Gastric	0.801911	2385.78	2384.88	12.5162	9.86202	4.46344	190.543	1.70022e-05	4.46119e-08	FIRST_PASS
CM10	WEU0064	Gastric	0.801911	2447.38	2447.38	69.2817	3.4375	1.5803	35.3251	1.72236e-05	2.42677e-07	ESTIMATED
CM10	WEU0064	Gastric	0.801911	2544.27	2544.27	18.0323	1.5569	0.733377	141.095	1.75612e-05	6.2149e-08	ESTIMATED
CM10	WEU0064	Gastric	0.801911	2578.52	2578.52	10.2085	-0.312078	-0.148278	252.586	1.7679e-05	3.5e-08	ESTIMATED
CM10	WEU0064	Gastric	0.801911	2802.49	2802.49	9.78621	1.88908	0.947302	286.372	1.84308e-05	3.2167e-08	ESTIMATED
CM10	WEU0064	Gastric	0.801911	2954.6	2958.19	8.84197	3.26534	1.67381	334.563	1.89359e-05	2.82986e-08	SECOND_PASS
CM10	WEU0064	Gastric	0.801911	3005.81	3005.81	105.045	0.611495	0.315556	28.6145	1.90877e-05	3.3589e-07	ESTIMATED
CM10	WEU0064	Gastric	0.801911	3031.71	3031.71	2.64658	1.1449	0.592967	1145.52	1.91698e-05	8.36829e-09	ESTIMATED
CM10	WEU0064	Gastric	0.801911	3101.32	3101.32	6.63592	0.826723	0.43238	467.353	1.93886e-05	2.07403e-08	ESTIMATED
CM10	WEU0064	Gastric	0.801911	3360.52	3360.15	24.3292	20.7284	7.62746	138.112	2.01815e-05	7.30385e-08	FIRST_PASS
CM10	WEU0064	Gastric	0.801911	3380.96	3380.96	43.8248	7.97917	2.83327	77.1471	2.02438e-05	1.31461e-07	ESTIMATED
CM10	WEU0064	Gastric	0.801911	3454.61	3454.61	43.7034	2.39159	0.756091	79.0468	2.04632e-05	1.29097e-07	ESTIMATED
CM10	WEU0064	Gastric	0.801911	3484.03	3467.12	20.0251	7.27209	2.25728	173.138	2.05002e-05	5.92013e-08	SECOND_PASS
CM10	WEU0064	Gastric	0.801911	3590.56	3588.67	22.7043	51.7131	13.8565	158.062	2.08564e-05	6.59744e-08	FIRST_PASS
CM10	WEU0064	Gastric	0.801911	3722.3	3722.3	63.2637	4.02564	1.09968	58.8378	2.12412e-05	1.80053e-07	ESTIMATED
CM10	WEU0064	Gastric	0.801911	3905.3	3903.17	23.6031	72.4694	20.3208	165.367	2.17511e-05	6.57651e-08	FIRST_PASS
CM10	WEU0064	Gastric	0.801911	3933.25	3933.25	69.088	8.71581	2.45462	56.931	2.18348e-05	1.92185e-07	ESTIMATED
CM10	WEU0064	Gastric	0.801911	4037.3	4037.3	61.2752	5.5587	1.58928	65.888	2.21217e-05	1.67642e-07	ESTIMATED
CM10	WEU0064	Gastric	0.801911	4065.01	4061.88	23.2994	11.7061	3.35885	174.334	2.21889e-05	6.36607e-08	FIRST_PASS
CM10	WEU0064	Gastric	0.801911	4146.61	4146.61	24.5222	2.92238	0.84891	169.096	2.24192e-05	6.62916e-08	ESTIMATED
CM10	WEU0064	Gastric	0.801911	4211.79	4211.79	30.7378	5.63595	1.65278	137.023	2.25947e-05	8.25103e-08	ESTIMATED
CM10	WEU0064	Gastric	0.801911	4376.6	4379.34	23.5849	226.569	68.0892	185.684	2.30397e-05	6.2044e-08	FIRST_PASS
CM10	WEU0064	Gastric	0.801911	4489.19	4492.41	23.5174	61.8122	18.8868	191.025	2.33353e-05	6.10788e-08	FIRST_PASS
CM10	WEU0064	Gastric	0.801911	4555.41	4549.63	23.9937	149.556	46.0834	189.617	2.34834e-05	6.19235e-08	FIRST_PASS
CM10	WEU0064	Gastric	0.801911	4585.09	4585.09	73.6068	37.2024	11.5234	62.2917	2.35747e-05	1.8961e-07	ESTIMATED
CM10	WEU0064	Gastric	0.801911	4645.37	4648.44	34.4716	24.1714	7.55747	134.849	2.3737e-05	8.80436e-08	FIRST_PASS
CM10	WEU0064	Gastric	0.801911	4698.93	4698.93	170.155	10.446	3.29057	27.6157	2.38656e-05	4.28948e-07	ESTIMATED
CM10	WEU0064	Gastric	0.801911	4767.2	4764.65	24.3857	353.952	112.591	195.388	2.40319e-05	6.15032e-08	FIRST_PASS
CM10	WEU0064	Gastric	0.801911	4908.07	4908.07	114.347	8.38631	3.02034	42.9226	2.43909e-05	2.82958e-07	ESTIMATED
CM10	WEU0064	Gastric	0.801911	4976.17	4975.31	37.5719	28.3745	11.0456	132.421	2.45575e-05	9.27232e-08	FIRST_PASS
CM10	WEU0064	Gastric	0.801911	5084.44	5083.55	23.3702	6.83479	3.05483	217.522	2.48231e-05	5.70563e-08	FIRST_PASS
CM10	WEU0064	Gastric	0.801911	5303.71	5303.71	29.9225	1.42969	0.903534	177.248	2.53549e-05	7.14917e-08	ESTIMATED
CM10	WEU0064	Gastric	0.801911	5402.2	5402.2	32.749	1.82381	1.22379	164.958	2.55893e-05	7.75294e-08	ESTIMATED
CM10	WEU0064	Gastric	0.801911	5524.52	5512.88	22.7393	5.29713	3.81665	242.438	2.58501e-05	5.33205e-08	FIRST_PASS
CM10	WEU0064	Gastric	0.801911	5619.57	5619.57	36.6273	0.605506	0.469332	153.426	2.6099e-05	8.50862e-08	ESTIMATED
CM10	WEU0064	Gastric	0.801911	5709.09	5708.54	25.8174	3.03366	2.50679	221.112	2.63048e-05	5.94837e-08	SECOND_PASS
CM10	WEU0064	Gastric	0.801911	5818.95	5820.63	30.1071	7.32067	6.08654	193.331	2.65618e-05	6.87009e-08	FIRST_PASS
CM10	WEU0064	Gastric	0.801911	5885.74	5880.38	30.1923	4.93498	4.11645	194.764	2.66978e-05	6.85285e-08	SECOND_PASS
CM10	WEU0064	Gastric	0.801911	6201.92	6196.56	36.8319	20.1728	17.1186	168.239	2.74062e-05	8.14409e-08	FIRST_PASS
CM10	WEU0064	Gastric	0.801911	6358.11	6354.98	43.2576	6.61789	5.6642	146.91	2.77543e-05	9.44454e-08	FIRST_PASS
CM10	WEU0064	Gastric	0.801911	6448.74	6448.74	319.998	2.88224	2.47938	20.1524	2.79583e-05	7.01331e-07	ESTIMATED
CM10	WEU0064	Gastric	0.801911	6699.18	6687.27	53.0387	3.21859	2.74422	126.083	2.84707e-05	1.12959e-07	FIRST_PASS
CM10	WEU0064	Gastric	0.801911	7098.61	7094.04	30.5315	9.9356	7.91935	232.351	2.93238e-05	6.30988e-08	FIRST_PASS
CM10	WEU0064	Gastric	0.801911	7273.9	7273.9	167.635	4.59655	3.56325	43.3913	2.96932e-05	3.42156e-07	ESTIMATED
CM10	WEU0064	Gastric	0.801911	7327.57	7322.51	28.517	67.335	51.8168	256.777	2.97922e-05	5.80117e-08	FIRST_PASS
CM10	WEU0064	Gastric	0.801911	7371.7	7371.7	197.077	7.09241	5.45025	37.4052	2.98921e-05	3.99572e-07	ESTIMATED
CM10	WEU0064	Gastric	0.801911	7498.7	7531.44	61.3665	7.75524	6.1254	122.729	3.02143e-05	1.2315e-07	FIRST_PASS
CM10	WEU0064	Gastric	0.801911	7686.69	7686.69	413.907	1.5747	1.27795	18.5711	3.05241e-05	8.21819e-07	ESTIMATED
CM10	WEU0064	Gastric	0.801911	8039.87	8039.87	50.9423	1.22185	1.05659	157.823	3.12174e-05	9.8924e-08	ESTIMATED
CM10	WEU0064	Gastric	0.801911	8204.63	8207.37	33.5898	4.70992	4.20142	244.341	3.1541e-05	6.45433e-08	FIRST_PASS
CM10	WEU0064	Gastric	0.801911	8316.73	8316.73	131.148	1.69323	1.53277	63.4148	3.17504e-05	2.50339e-07	ESTIMATED
CM10	WEU0064	Gastric	0.801911	8414.87	8413.19	43.0769	12.8707	11.779	195.306	3.1934e-05	8.17457e-08	FIRST_PASS
CM10	WEU0064	Gastric	0.801911	8485.43	8483.98	42.6721	23.8479	22.0017	198.818	3.20681e-05	8.06346e-08	FIRST_PASS
CM10	WEU0064	Gastric	0.801911	8577.95	8587.27	153.108	9.41193	8.78649	56.0865	3.22627e-05	2.87616e-07	SECOND_PASS
CM10	WEU0064	Gastric	0.801911	8794.7	8794.7	5.38705	1.86978	1.7878	1632.57	3.265e-05	1e-08	ESTIMATED
CM10	WEU0064	Gastric	0.801911	8879.33	8879.33	25.3472	1.77	1.70915	350.308	3.28067e-05	4.68255e-08	ESTIMATED
CM10	WEU0064	Gastric	0.801911	9114.7	9094.59	80.046	4.32591	4.28413	113.617	3.3202e-05	1.45956e-07	FIRST_PASS
CM10	WEU0064	Gastric	0.801911	9515.82	9515.82	166.582	2.58641	2.69406	57.124	3.39622e-05	2.9631e-07	ESTIMATED
CM10	WEU0064	Gastric	0.801911	9618.76	9594.6	73.46	4.14025	4.35419	130.61	3.41025e-05	1.30513e-07	FIRST_PASS
CM10	WEU0064	Gastric	0.801911	9788.19	9772.31	54.1871	9.47174	10.1813	180.344	3.44169e-05	9.53785e-08	FIRST_PASS
CM10	WEU0064	Gastric	0.801911	9980.84	9980.84	490.71	2.28743	2.52359	20.3396	3.47822e-05	8.55035e-07	ESTIMATED
CM10	WEU0064	Gastric	0.801911	10079.5	10079.5	4.32513	1.20591	1.34707	2330.45	3.49536e-05	7.5e-09	ESTIMATED
CM10	WEU0064	Gastric	0.801911	10117.5	10117.5	28.1625	2.09728	2.35413	359.256	3.50196e-05	4.875e-08	ESTIMATED
CM10	WEU0064	Gastric	0.801911	10232.2	10229.8	30.7885	30.5019	34.7313	332.262	3.52133e-05	5.29917e-08	FIRST_PASS
CM10	WEU0064	Gastric	0.801911	10309.1	10309.1	284.952	4.6557	5.35561	36.1786	3.53496e-05	4.88543e-07	ESTIMATED
CM10	WEU0064	Gastric	0.801911	10447.6	10446.5	65.2484	8.55452	10.5778	160.104	3.55843e-05	1.11138e-07	FIRST_PASS
CM10	WEU0064	Gastric	0.801911	10570.1	10545.8	104.223	6.72386	8.86443	101.185	3.5753e-05	1.76493e-07	FIRST_PASS
CM10	WEU0064	Gastric	0.801911	10681.8	10681.8	438.05	3.00788	4.35861	24.385	3.59829e-05	7.37809e-07	ESTIMATED
CM10	WEU0064	Gastric	0.801911	10806	10782.4	101.119	4.09032	6.39318	106.631	3.61519e-05	1.69558e-07	FIRST_PASS
CM10	WEU0064	Gastric	0.801911	10869.9	10863.5	59.199	3.94936	6.58872	183.509	3.62876e-05	9.88799e-08	FIRST_PASS
CM10	WEU0064	Gastric	0.801911	10982.1	10982.1	56.4484	1.31304	2.42871	194.551	3.64851e-05	9.375e-08	ESTIMATED
CM10	WEU0064	Gastric	0.801911	11090.1	11090.1	61.6069	1.45965	2.99505	180.014	3.66641e-05	1.01866e-07	ESTIMATED
CM10	WEU0064	Gastric	0.801911	11782.6	11754.7	42.9888	34.5442	68.6192	273.436	3.77466e-05	6.90142e-08	FIRST_PASS
CM10	WEU0064	Gastric	0.801911	11984.7	11970.2	75.7391	6.47039	13.9707	158.045	3.80911e-05	1.20507e-07	FIRST_PASS
CM10	WEU0064	Gastric	0.801911	12300	12300	759.59	1.70147	4.23034	16.1929	3.86123e-05	1.20852e-06	ESTIMATED
CM10	WEU0064	Gastric	0.801911	12731.2	12721.6	62.8941	0.908734	2.792	202.27	3.92685e-05	9.70645e-08	SECOND_PASS
CM10	WEU0064	Gastric	0.801911	13373.5	13384.3	64.3659	10.4515	31.2952	207.942	4.02783e-05	9.68405e-08	FIRST_PASS
CM10	WEU0064	Gastric	0.801911	13803	13832.2	118.276	3.18554	9.29044	116.949	4.09467e-05	1.75062e-07	FIRST_PASS
CM10	WEU0064	Gastric	0.801911	13913.6	13909.1	92.4138	2.82908	8.21453	150.509	4.10603e-05	1.3625e-07	SECOND_PASS
CM10	WEU0064	Gastric	0.801911	14136.2	14141.8	62.8389	4.62636	13.3854	225.049	4.14024e-05	9.19802e-08	FIRST_PASS
CM10	WEU0064	Gastric	0.801911	14724.3	14714.2	48.8678	3.80731	12.4875	301.101	4.22319e-05	7.01265e-08	FIRST_PASS
CM10	WEU0064	Gastric	0.801911	15152.9	15152.9	624.894	0.578351	2.10929	24.2488	4.28569e-05	8.77445e-07	ESTIMATED
CM10	WEU0064	Gastric	0.801911	15310.6	15290.6	322.915	1.21845	4.60403	47.3519	4.30512e-05	4.53834e-07	FIRST_PASS
CM10	WEU0064	Gastric	0.801911	15864.9	15864.9	169.882	0.327181	1.45234	93.3876	4.38522e-05	2.34368e-07	ESTIMATED
CM10	WEU0064	Gastric	0.801911	16033.6	16033.6	69.0114	0.183554	0.864327	232.332	4.40847e-05	9.48743e-08	ESTIMATED
CM10	WEU0064	Gastric	0.801911	16672.7	16672.7	1389.25	9.33211	49.5177	12.0012	4.49548e-05	1.839e-06	ESTIMATED
CM10	WEU0064	Gastric	0.801911	16824.4	16814.6	65.852	48.4146	262.973	255.34	4.51457e-05	8.84032e-08	FIRST_PASS
CM10	WEU0064	Gastric	0.801911	16960.1	16960.1	75.7745	89.2373	496.697	223.823	4.53405e-05	1.01272e-07	FIRST_PASS
CM10	WEU0064	Gastric	0.801911	17122.2	17110.3	31.9326	27.7904	158.719	535.824	4.55409e-05	4.25e-08	FIRST_PASS
CM10	WEU0064	Gastric	0.801911	17164.7	17160.8	149.111	28.8837	166.421	115.088	4.56081e-05	1.98145e-07	FIRST_PASS
CM10	WEU0064	Gastric	0.801911	17320.2	17313.4	87.9092	15.4802	91.6287	196.946	4.58104e-05	1.1625e-07	FIRST_PASS
CM10	WEU0064	Gastric	0.801911	17500.5	17486.5	73.1352	13.0924	79.9626	239.099	4.60389e-05	9.625e-08	FIRST_PASS
CM10	WEU0064	Gastric	0.801911	17650.4	17625.9	636.465	10.0382	62.9141	27.6935	4.6222e-05	8.34529e-07	FIRST_PASS
CM10	WEU0064	Gastric	0.801911	18111.6	18111.6	1.93276	3.61829	24.9319	9370.85	4.68545e-05	2.5e-09	ESTIMATED
CM10	WEU0064	Gastric	0.801911	18178.6	18178.6	78.4336	3.69808	25.8333	231.77	4.69411e-05	1.0125e-07	ESTIMATED
CM10	WEU0064	Gastric	0.801911	18269.1	18269.1	899.986	2.73654	19.4785	20.2993	4.70578e-05	1.1591e-06	ESTIMATED
CM10	WEU0064	Gastric	0.801911	18751.1	18751.1	1249.61	1.33339	10.5471	15.0055	4.76745e-05	1.58857e-06	ESTIMATED
CM10	WEU0064	Gastric	0.801911	19150.3	19127	104.282	2.74263	23.73	183.416	4.815e-05	1.31263e-07	FIRST_PASS
CM10	WEU0064	Gastric	0.801911	20592.5	20589.5	81.1764	0.3419	2.2671	253.639	4.9957e-05	9.84868e-08	SECOND_PASS
CM10	WEU0064	Gastric	0.801911	20980.4	20980.4	117.802	0.204499	1.74513	178.099	5.0429e-05	1.41576e-07	ESTIMATED
CM10	WEU0064	Gastric	0.801911	21216.4	21205.9	494.872	0.667393	6.0598	42.8512	5.06992e-05	5.89392e-07	FIRST_PASS
CM10	WEU0064	Gastric	0.801911	21364.9	21364.9	556.87	0.534189	5.07848	38.366	5.08889e-05	6.63255e-07	ESTIMATED
CM10	WEU0064	Gastric	0.801911	22355.1	22355.1	201.688	0.203477	2.38317	110.84	5.20549e-05	2.35e-07	ESTIMATED
CM10	WEU0064	Gastric	0.801911	23650.4	23613.1	922.912	1.11465	14.7895	25.5854	5.34995e-05	1.04551e-06	FIRST_PASS
CM10	WEU0068	Gastric	0.440156	1507.55	1507.55	72.513	11.6433	5.19186	20.79	1.35179e-05	3.25105e-07	ESTIMATED
CM10	WEU0068	Gastric	0.440156	1733.86	1737.99	67.0052	11.5424	4.82804	25.9381	1.45143e-05	2.79787e-07	FIRST_PASS
CM10	WEU0068	Gastric	0.440156	1754.42	1754.42	68.5199	8.44823	3.54511	25.6045	1.45827e-05	2.84909e-07	ESTIMATED
CM10	WEU0068	Gastric	0.440156	1954.32	1952.37	16.4089	13.3158	5.80547	118.982	1.53835e-05	6.46441e-08	FIRST_PASS
CM10	WEU0068	Gastric	0.440156	1977.43	1977.43	91.9193	5.74712	2.51772	21.5127	1.54819e-05	3.59152e-07	ESTIMATED
CM10	WEU0068	Gastric	0.440156	1996.56	2002.8	29.1742	8.41239	3.70326	68.6496	1.55809e-05	1.13441e-07	SECOND_PASS
CM10	WEU0068	Gastric	0.440156	2203.66	2202.43	14.485	5.84656	2.56017	152.049	1.6339e-05	5.37577e-08	SECOND_PASS
CM10	WEU0068	Gastric	0.440156	2222.28	2222.28	5.0885	1.9098	0.828905	436.725	1.64124e-05	1.87903e-08	ESTIMATED
CM10	WEU0068	Gastric	0.440156	2240.07	2240.07	21.2826	5.65192	2.43392	105.254	1.6478e-05	7.82174e-08	ESTIMATED
CM10	WEU0068	Gastric	0.440156	2385.78	2385.78	32.1751	1.0053	0.407299	74.1498	1.70055e-05	1.14324e-07	ESTIMATED
CM10	WEU0068	Gastric	0.440156	2447.38	2449.18	18.1405	13.2563	5.23888	135.012	1.72299e-05	6.38196e-08	FIRST_PASS
CM10	WEU0068	Gastric	0.440156	2544.27	2544.27	14.8195	0.0327727	0.0124986	171.684	1.75612e-05	5.1218e-08	ESTIMATED
CM10	WEU0068	Gastric	0.440156	2578.52	2578.52	31.3644	2.69585	1.01549	82.2116	1.7679e-05	1.073e-07	ESTIMATED
CM10	WEU0068	Gastric	0.440156	2802.49	2801.92	18.8353	52.3744	17.3408	148.758	1.84289e-05	6.19374e-08	FIRST_PASS
CM10	WEU0068	Gastric	0.440156	2954.6	2954.6	47.0972	2.35477	0.714274	62.734	1.89244e-05	1.51253e-07	ESTIMATED
CM10	WEU0068	Gastric	0.440156	3005.81	3005.81	63.6292	4.38895	1.2955	47.2394	1.90877e-05	2.01126e-07	ESTIMATED
CM10	WEU0068	Gastric	0.440156	3031.71	3036.97	27.8442	11.2942	3.28045	109.07	1.91864e-05	8.79489e-08	FIRST_PASS
CM10	WEU0068	Gastric	0.440156	3101.32	3101.32	42.1393	5.30733	1.54783	73.5968	1.93886e-05	1.31895e-07	ESTIMATED
CM10	WEU0068	Gastric	0.440156	3360.52	3360.52	69.059	20.5099	6.24101	48.6615	2.01825e-05	2.07377e-07	ESTIMATED
CM10	WEU0068	Gastric	0.440156	3380.96	3385.85	21.8737	246.807	75.4145	154.791	2.02585e-05	6.54373e-08	FIRST_PASS
CM10	WEU0068	Gastric	0.440156	3454.61	3456.48	23.7233	335.992	103.864	145.7	2.04687e-05	7.02391e-08	FIRST_PASS
CM10	WEU0068	Gastric	0.440156	3484.03	3500.15	31.2224	260.347	81.06	112.104	2.05976e-05	9.18867e-08	FIRST_PASS
CM10	WEU0068	Gastric	0.440156	3590.56	3590.56	353.112	35.6022	11.2511	10.1683	2.08619e-05	1.02583e-06	ESTIMATED
CM10	WEU0068	Gastric	0.440156	3722.3	3722.75	37.5439	43.7497	14.1311	99.1573	2.12425e-05	1.07161e-07	FIRST_PASS
CM10	WEU0068	Gastric	0.440156	3905.3	3905.3	18.8288	4.27834	1.42441	207.41	2.1757e-05	5.25e-08	ESTIMATED
CM10	WEU0068	Gastric	0.440156	3933.25	3933.25	72.9597	5.26608	1.76145	53.91	2.18348e-05	2.02512e-07	ESTIMATED
CM10	WEU0068	Gastric	0.440156	4037.3	4037.3	8.20958	0.268719	0.0914599	491.779	2.21217e-05	2.25e-08	ESTIMATED
CM10	WEU0068	Gastric	0.440156	4065.01	4065.01	39.8584	3.14925	1.07685	101.986	2.21975e-05	1.08778e-07	ESTIMATED
CM10	WEU0068	Gastric	0.440156	4146.61	4146.61	30.6549	4.50474	1.49514	135.267	2.24192e-05	8.29527e-08	ESTIMATED
CM10	WEU0068	Gastric	0.440156	4211.79	4211.79	6.96449	1.43419	0.460128	604.752	2.25947e-05	1.8681e-08	ESTIMATED
CM10	WEU0068	Gastric	0.440156	4376.6	4376.6	29.2311	6.61342	1.95875	149.724	2.30325e-05	7.69482e-08	ESTIMATED
CM10	WEU0068	Gastric	0.440156	4489.19	4489.19	49.9616	3.07789	0.866822	89.8528	2.33269e-05	1.30021e-07	ESTIMATED
CM10	WEU0068	Gastric	0.440156	4555.41	4555.41	24.1384	3.86057	1.07964	188.72	2.34983e-05	6.22569e-08	ESTIMATED
CM10	WEU0068	Gastric	0.440156	4585.09	4585.09	22.8075	4.84021	1.3864	201.034	2.35747e-05	5.86337e-08	ESTIMATED
CM10	WEU0068	Gastric	0.440156	4645.37	4645.37	5.37795	-0.147593	-0.0444528	863.781	2.37292e-05	1.37312e-08	ESTIMATED
CM10	WEU0068	Gastric	0.440156	4698.93	4698.93	42.6778	2.5485	0.804146	110.103	2.38656e-05	1.08546e-07	ESTIMATED
CM10	WEU0068	Gastric	0.440156	4767.2	4769.68	26.9454	6.48223	2.1818	177.013	2.40446e-05	6.79375e-08	SECOND_PASS
CM10	WEU0068	Gastric	0.440156	4908.07	4908.07	93.7629	1.63227	0.63079	52.3456	2.43909e-05	2.3298e-07	ESTIMATED
CM10	WEU0068	Gastric	0.440156	4976.17	4976.17	128.909	3.54394	1.47602	38.6022	2.45596e-05	3.16787e-07	ESTIMATED
CM10	WEU0068	Gastric	0.440156	5084.44	5084.44	8.19519	1.48308	0.703946	620.418	2.48253e-05	2e-08	ESTIMATED
CM10	WEU0068	Gastric	0.440156	5303.71	5312.79	44.2069	8.80893	5.20909	120.18	2.53767e-05	1.05628e-07	FIRST_PASS
CM10	WEU0068	Gastric	0.440156	5402.2	5405.31	74.1372	13.0231	7.86863	72.9095	2.55967e-05	1.75337e-07	FIRST_PASS
CM10	WEU0068	Gastric	0.440156	5524.52	5518.16	43.059	21.0255	13.0466	128.153	2.58625e-05	1.00884e-07	FIRST_PASS
CM10	WEU0068	Gastric	0.440156	5619.57	5632.15	74.3597	15.3266	9.77408	75.742	2.61282e-05	1.72676e-07	FIRST_PASS
CM10	WEU0068	Gastric	0.440156	5709.09	5718.76	58.509	13.8122	8.99623	97.7416	2.63284e-05	1.34738e-07	FIRST_PASS
CM10	WEU0068	Gastric	0.440156	5818.95	5818.95	1227.12	4.53473	3.02768	4.74196	2.6558e-05	2.80032e-06	ESTIMATED
CM10	WEU0068	Gastric	0.440156	5885.74	5885.74	155.221	2.94259	1.99784	37.9184	2.671e-05	3.52204e-07	ESTIMATED
CM10	WEU0068	Gastric	0.440156	6201.92	6201.92	35.4202	1.15697	0.864347	175.096	2.7418e-05	7.82944e-08	ESTIMATED
CM10	WEU0068	Gastric	0.440156	6358.11	6364.87	52.9996	3.54798	2.87771	120.093	2.77759e-05	1.15641e-07	FIRST_PASS
CM10	WEU0068	Gastric	0.440156	6448.74	6448.74	91.7909	0.988351	0.838237	70.2546	2.79583e-05	1.98978e-07	ESTIMATED
CM10	WEU0068	Gastric	0.440156	6699.18	6699.18	118.854	0.490093	0.480309	56.3648	2.8496e-05	2.5181e-07	ESTIMATED
CM10	WEU0068	Gastric	0.440156	7098.61	7098.61	5.67421	0.224821	0.28263	1251.03	2.93332e-05	1.17236e-08	ESTIMATED
CM10	WEU0068	Gastric	0.440156	7273.9	7273.9	2.00828	0.148813	0.188302	3621.96	2.96932e-05	4.09905e-09	ESTIMATED
CM10	WEU0068	Gastric	0.440156	7327.57	7327.57	152.706	0.726407	0.920997	47.9847	2.98025e-05	3.10003e-07	ESTIMATED
CM10	WEU0068	Gastric	0.440156	7371.7	7365.77	34.8876	4.19543	5.32683	211.129	2.98801e-05	7.07712e-08	FIRST_PASS
CM10	WEU0068	Gastric	0.440156	7498.7	7508.45	32.7923	5.33633	6.81117	228.97	3.01681e-05	6.58778e-08	FIRST_PASS
CM10	WEU0068	Gastric	0.440156	7686.69	7686.69	117.678	0.351005	0.417635	65.3196	3.05241e-05	2.33045e-07	ESTIMATED
CM10	WEU0068	Gastric	0.440156	8039.87	8039.87	81.0887	3.88907	3.69908	99.149	3.12174e-05	1.57215e-07	ESTIMATED
CM10	WEU0068	Gastric	0.440156	8204.63	8204.68	32.611	3.34938	2.93622	251.592	3.15358e-05	6.26705e-08	SECOND_PASS
CM10	WEU0068	Gastric	0.440156	8316.73	8316.41	31.2643	3.83332	3.29662	266.003	3.17498e-05	5.96772e-08	SECOND_PASS
CM10	WEU0068	Gastric	0.440156	8414.87	8414.87	477.763	1.31499	1.11237	17.6131	3.19372e-05	9.06634e-07	ESTIMATED
CM10	WEU0068	Gastric	0.440156	8485.43	8485.43	51.9048	1.8941	1.58378	163.481	3.20708e-05	9.813e-08	ESTIMATED
CM10	WEU0068	Gastric	0.440156	8577.95	8587.66	34.2338	4.79307	3.94225	250.854	3.22634e-05	6.43131e-08	FIRST_PASS
CM10	WEU0068	Gastric	0.440156	8794.7	8794.43	33.3187	9.99943	7.96335	263.949	3.26495e-05	6.18446e-08	FIRST_PASS
CM10	WEU0068	Gastric	0.440156	8879.33	8869.71	41.3928	18.5362	14.5945	214.281	3.2789e-05	7.6502e-08	FIRST_PASS
CM10	WEU0068	Gastric	0.440156	9114.7	9102.51	39.9965	8.42811	6.41308	227.583	3.32165e-05	7.29821e-08	FIRST_PASS
CM10	WEU0068	Gastric	0.440156	9515.82	9515.82	55.1412	1.04157	0.748689	172.572	3.39622e-05	9.84294e-08	ESTIMATED
CM10	WEU0068	Gastric	0.440156	9618.76	9618.76	70.0299	0.609712	0.443934	137.352	3.41454e-05	1.24175e-07	ESTIMATED
CM10	WEU0068	Gastric	0.440156	9788.19	9773.35	43.0466	5.8067	4.41296	227.041	3.44187e-05	7.57737e-08	FIRST_PASS
CM10	WEU0068	Gastric	0.440156	9980.84	9980.84	246.248	2.10669	1.70001	40.5317	3.47822e-05	4.29073e-07	ESTIMATED
CM10	WEU0068	Gastric	0.440156	10079.5	10079.5	100.359	4.83667	4.02026	100.435	3.49536e-05	1.73741e-07	ESTIMATED
CM10	WEU0068	Gastric	0.440156	10117.5	10127.5	30.3095	11.5605	9.75121	334.136	3.50368e-05	5.24329e-08	FIRST_PASS
CM10	WEU0068	Gastric	0.440156	10232.2	10235.2	40.7678	7.36877	6.42786	251.061	3.52226e-05	7.01435e-08	FIRST_PASS
CM10	WEU0068	Gastric	0.440156	10309.1	10309.1	231.453	4.48174	4.00293	44.541	3.53496e-05	3.96821e-07	ESTIMATED
CM10	WEU0068	Gastric	0.440156	10447.6	10470.6	27.4282	33.3699	31.437	381.747	3.56254e-05	4.66625e-08	FIRST_PASS
CM10	WEU0068	Gastric	0.440156	10570.1	10570.1	335.985	4.53017	4.41576	31.46	3.57942e-05	5.68884e-07	ESTIMATED
CM10	WEU0068	Gastric	0.440156	10681.8	10678.7	80.69	4.758	4.81955	132.343	3.59777e-05	1.35926e-07	SECOND_PASS
CM10	WEU0068	Gastric	0.440156	10806	10806	92.8932	4.03718	4.2849	116.327	3.61913e-05	1.55559e-07	ESTIMATED
CM10	WEU0068	Gastric	0.440156	10869.9	10875.8	34.4896	37.5653	40.94	315.336	3.63081e-05	5.75763e-08	FIRST_PASS
CM10	WEU0068	Gastric	0.440156	10982.1	10982.1	315.858	5.63577	6.40233	34.769	3.64851e-05	5.24678e-07	ESTIMATED
CM10	WEU0068	Gastric	0.440156	11090.1	11083.7	57.0532	8.24308	9.75784	194.27	3.66535e-05	9.43366e-08	FIRST_PASS
CM10	WEU0068	Gastric	0.440156	11782.6	11768.4	80.204	3.4366	8.53986	146.731	3.77687e-05	1.2868e-07	FIRST_PASS
CM10	WEU0068	Gastric	0.440156	11984.7	11984.7	653.37	1.89387	5.01439	18.3428	3.81141e-05	1.03894e-06	ESTIMATED
CM10	WEU0068	Gastric	0.440156	12300	12300	1045.87	3.90087	11.4053	11.7606	3.86123e-05	1.62562e-06	ESTIMATED
CM10	WEU0068	Gastric	0.440156	12731.2	12736.8	134.127	10.9386	37.2874	94.9614	3.9292e-05	2.06928e-07	FIRST_PASS
CM10	WEU0068	Gastric	0.440156	13373.5	13361	395.884	4.34529	19.2905	33.7499	4.02433e-05	5.96198e-07	FIRST_PASS
CM10	WEU0068	Gastric	0.440156	13803	13803	195.824	0.520667	2.90771	70.4871	4.09035e-05	2.90149e-07	ESTIMATED
CM10	WEU0068	Gastric	0.440156	13913.6	13913.6	208.141	0.35422	2.07121	66.847	4.1067e-05	3.07171e-07	ESTIMATED
CM10	WEU0068	Gastric	0.440156	14136.2	14136.2	110.137	0.0040658	0.0262447	128.351	4.13942e-05	1.61133e-07	ESTIMATED
CM10	WEU0068	Gastric	0.440156	14724.3	14722.5	42.761	26.7394	183.054	344.298	4.22439e-05	6.13505e-08	FIRST_PASS
CM10	WEU0068	Gastric	0.440156	15152.9	15152.9	1599.86	1.55765	10.6598	9.47142	4.28569e-05	2.24974e-06	ESTIMATED
CM10	WEU0068	Gastric	0.440156	15310.6	15365.5	199.732	1.3897	9.50891	76.9306	4.31565e-05	2.8e-07	SECOND_PASS
CM10	WEU0068	Gastric	0.440156	15864.9	15864.5	66.722	6.78247	47.2627	237.771	4.38517e-05	9.2198e-08	FIRST_PASS
CM10	WEU0068	Gastric	0.440156	16033.6	16068.1	140.878	1.43728	10.4278	114.057	4.41322e-05	1.93465e-07	SECOND_PASS
CM10	WEU0068	Gastric	0.440156	16672.7	16672.7	37.7426	0.164377	1.33716	441.747	4.49548e-05	5.0883e-08	ESTIMATED
CM10	WEU0068	Gastric	0.440156	16824.4	16819.8	97.8283	1.0812	8.88257	171.932	4.51526e-05	1.31271e-07	FIRST_PASS
CM10	WEU0068	Gastric	0.440156	16960.1	16971.8	90.6995	1.94556	16.1486	187.122	4.53563e-05	1.21168e-07	FIRST_PASS
CM10	WEU0068	Gastric	0.440156	17122.2	17122.2	469.797	0.706748	5.92643	36.4459	4.55567e-05	6.27252e-07	ESTIMATED
CM10	WEU0068	Gastric	0.440156	17164.7	17169.4	120.805	0.794523	6.68395	142.125	4.56195e-05	1.6049e-07	SECOND_PASS
CM10	WEU0068	Gastric	0.440156	17320.2	17327.5	111.276	0.607512	5.16634	155.716	4.5829e-05	1.47095e-07	FIRST_PASS
CM10	WEU0068	Gastric	0.440156	17500.5	17482	147.182	0.586049	5.03715	118.777	4.60329e-05	1.93563e-07	SECOND_PASS
CM10	WEU0068	Gastric	0.440156	17650.4	17650.4	174.117	0.396822	3.45082	101.371	4.62541e-05	2.28143e-07	ESTIMATED
CM10	WEU0068	Gastric	0.440156	18111.6	18111.6	174.501	0.65717	5.90309	103.791	4.68545e-05	2.25716e-07	ESTIMATED
CM10	WEU0068	Gastric	0.440156	18178.6	18194.8	143.924	1.43605	12.976	126.419	4.6962e-05	1.8572e-07	FIRST_PASS
CM10	WEU0068	Gastric	0.440156	18269.1	18269.1	334.578	0.735044	6.67708	54.6034	4.70578e-05	4.30906e-07	ESTIMATED
CM10	WEU0068	Gastric	0.440156	18751.1	18717.1	100.051	0.528272	4.95651	187.076	4.76313e-05	1.27288e-07	FIRST_PASS
CM10	WEU0068	Gastric	0.440156	19150.3	19150.3	664.947	0.0836659	0.81745	28.7997	4.81793e-05	8.36456e-07	ESTIMATED
CM10	WEU0068	Gastric	0.440156	20592.5	20599.4	103.544	0.718349	9.80704	198.942	4.99689e-05	1.25581e-07	FIRST_PASS
CM10	WEU0068	Gastric	0.440156	20980.4	20999.4	144.75	0.245966	4.24511	145.073	5.04518e-05	1.73889e-07	SECOND_PASS
CM10	WEU0068	Gastric	0.440156	21216.4	21216.4	909.845	0.0551134	1.10895	23.3187	5.07117e-05	1.09796e-06	ESTIMATED
CM10	WEU0068	Gastric	0.440156	21364.9	21364.9	56.4166	0.0565975	1.28395	378.699	5.08889e-05	6.7192e-08	ESTIMATED
CM10	WEU0068	Gastric	0.440156	22355.1	22355.1	282.819	0.329723	5.58404	79.0438	5.20549e-05	3.29278e-07	ESTIMATED
CM10	WEU0068	Gastric	0.440156	23650.4	23570.4	1369.93	1.25384	23.3536	17.2056	5.3451e-05	1.56302e-06	FIRST_PASS
CM10	WEU0073	Gastric	0.836071	1507.55	1507.55	55.0832	27.7117	8.08254	27.3685	1.35179e-05	2.4696e-07	ESTIMATED
CM10	WEU0073	Gastric	0.836071	1733.86	1732.82	8.66578	19.388	5.56162	199.962	1.44927e-05	3.625e-08	SECOND_PASS
CM10	WEU0073	Gastric	0.836071	1754.42	1752.93	47.0937	21.3958	6.1289	37.2222	1.45766e-05	1.95805e-07	FIRST_PASS
CM10	WEU0073	Gastric	0.836071	1954.32	1954.32	20.1935	9.30332	2.9756	96.7797	1.53912e-05	7.95164e-08	ESTIMATED
CM10	WEU0073	Gastric	0.836071	1977.43	1977.43	98.3648	12.3851	4.02042	20.103	1.54819e-05	3.85063e-07	ESTIMATED
CM10	WEU0073	Gastric	0.836071	1996.56	1992.07	78.2102	13.7206	4.49627	25.4707	1.55391e-05	3.05478e-07	FIRST_PASS
CM10	WEU0073	Gastric	0.836071	2203.66	2203.66	38.7246	6.85573	2.59309	56.9058	1.63435e-05	1.43601e-07	ESTIMATED
CM10	WEU0073	Gastric	0.836071	2222.28	2221.54	72.2529	9.07365	3.47609	30.7467	1.64097e-05	2.66662e-07	FIRST_PASS
CM10	WEU0073	Gastric	0.836071	2240.07	2240.07	45.9273	8.02442	3.10203	48.7741	1.6478e-05	1.68921e-07	ESTIMATED
CM10	WEU0073	Gastric	0.836071	2385.78	2383.99	12.7182	23.8535	9.89304	187.447	1.69991e-05	4.53378e-08	FIRST_PASS
CM10	WEU0073	Gastric	0.836071	2447.38	2444.77	19.2849	6.81724	2.91517	126.771	1.72144e-05	6.78768e-08	FIRST_PASS
CM10	WEU0073	Gastric	0.836071	2544.27	2544.27	11.1347	2.11619	0.952551	228.499	1.75612e-05	3.8413e-08	ESTIMATED
CM10	WEU0073	Gastric	0.836071	2578.52	2578.52	4.28617	1.85606	0.850668	601.59	1.7679e-05	1.469e-08	ESTIMATED
CM10	WEU0073	Gastric	0.836071	2802.49	2798.66	8.84172	6.68275	3.45781	316.529	1.84183e-05	2.90798e-08	FIRST_PASS
CM10	WEU0073	Gastric	0.836071	2954.6	2948.66	14.6199	3.59513	1.9416	201.688	1.89054e-05	4.683e-08	SECOND_PASS
CM10	WEU0073	Gastric	0.836071	3005.81	3005.81	16.2501	0.139278	0.0763113	184.972	1.90877e-05	5.15518e-08	ESTIMATED
CM10	WEU0073	Gastric	0.836071	3031.71	3031.71	8.67493	1.06117	0.585243	349.479	1.91698e-05	2.74403e-08	ESTIMATED
CM10	WEU0073	Gastric	0.836071	3101.32	3100.86	13.8112	3.38326	1.899	224.519	1.93872e-05	4.31887e-08	SECOND_PASS
CM10	WEU0073	Gastric	0.836071	3360.52	3360.52	78.8216	2.06612	1.17674	42.6344	2.01825e-05	2.36411e-07	ESTIMATED
CM10	WEU0073	Gastric	0.836071	3380.96	3381.47	18.4598	12.9252	7.30107	183.18	2.02454e-05	5.52564e-08	FIRST_PASS
CM10	WEU0073	Gastric	0.836071	3454.61	3453.17	20.6975	20.7945	11.4277	166.84	2.04589e-05	6.13118e-08	FIRST_PASS
CM10	WEU0073	Gastric	0.836071	3484.03	3496.43	24.1163	17.1995	9.30108	144.982	2.05867e-05	7.09911e-08	FIRST_PASS
CM10	WEU0073	Gastric	0.836071	3590.56	3590.56	27.866	2.97592	1.55578	128.851	2.08619e-05	8.09378e-08	ESTIMATED
CM10	WEU0073	Gastric	0.836071	3722.3	3716.44	24.8362	6.95428	3.48304	149.638	2.12245e-05	7.08955e-08	FIRST_PASS
CM10	WEU0073	Gastric	0.836071	3905.3	3905.3	2.18408	0.885453	0.419159	1788.07	2.1757e-05	6.08387e-09	ESTIMATED
CM10	WEU0073	Gastric	0.836071	3933.25	3933.25	21.8116	1.89273	0.890411	180.329	2.18348e-05	6.05162e-08	ESTIMATED
CM10	WEU0073	Gastric	0.836071	4037.3	4030.23	23.9398	11.7084	5.39253	168.349	2.21023e-05	6.56603e-08	FIRST_PASS
CM10	WEU0073	Gastric	0.836071	4065.01	4065.01	59.8703	2.46252	1.12576	67.897	2.21975e-05	1.64041e-07	ESTIMATED
CM10	WEU0073	Gastric	0.836071	4146.61	4140.06	34.5942	8.5205	3.83436	119.675	2.24015e-05	9.35607e-08	FIRST_PASS
CM10	WEU0073	Gastric	0.836071	4211.79	4211.79	18.0104	0.599631	0.265908	233.854	2.25947e-05	4.83265e-08	ESTIMATED
CM10	WEU0073	Gastric	0.836071	4376.6	4371.72	29.0818	60.5698	26.025	150.325	2.30197e-05	7.65631e-08	FIRST_PASS
CM10	WEU0073	Gastric	0.836071	4489.19	4491.72	23.0466	18.6675	7.84091	194.898	2.33335e-05	5.98704e-08	FIRST_PASS
CM10	WEU0073	Gastric	0.836071	4555.41	4550.02	25.8673	14.1106	5.86361	175.899	2.34844e-05	6.67429e-08	FIRST_PASS
CM10	WEU0073	Gastric	0.836071	4585.09	4582.67	26.8592	19.0382	7.86445	170.618	2.35685e-05	6.90619e-08	FIRST_PASS
CM10	WEU0073	Gastric	0.836071	4645.37	4634.91	24.669	51.3202	21.0019	187.884	2.37025e-05	6.30701e-08	FIRST_PASS
CM10	WEU0073	Gastric	0.836071	4698.93	4698.93	175.308	19.0246	7.69801	26.8039	2.38656e-05	4.41999e-07	ESTIMATED
CM10	WEU0073	Gastric	0.836071	4767.2	4762.93	24.0237	691.676	276.751	198.259	2.40276e-05	6.05922e-08	FIRST_PASS
CM10	WEU0073	Gastric	0.836071	4908.07	4909.83	29.8204	17.1174	6.66974	164.647	2.43953e-05	7.40838e-08	FIRST_PASS
CM10	WEU0073	Gastric	0.836071	4976.17	4972.01	34.5383	56.1299	21.6337	143.957	2.45493e-05	8.52426e-08	FIRST_PASS
CM10	WEU0073	Gastric	0.836071	5084.44	5084.44	153.76	0.884791	0.334518	33.0673	2.48253e-05	3.7283e-07	ESTIMATED
CM10	WEU0073	Gastric	0.836071	5303.71	5303.71	34.3131	3.70459	1.35119	154.568	2.53549e-05	8.19527e-08	ESTIMATED
CM10	WEU0073	Gastric	0.836071	5402.2	5397.27	27.2837	12.7708	4.58987	197.82	2.55776e-05	6.46327e-08	FIRST_PASS
CM10	WEU0073	Gastric	0.836071	5524.52	5512.07	24.4687	63.9874	24.3641	225.27	2.58482e-05	5.73689e-08	FIRST_PASS
CM10	WEU0073	Gastric	0.836071	5619.57	5619.57	173.044	1.66764	0.687486	32.4748	2.6099e-05	4.04708e-07	ESTIMATED
CM10	WEU0073	Gastric	0.836071	5709.09	5713.96	31.9095	4.67463	2.07654	179.068	2.63173e-05	7.34667e-08	SECOND_PASS
CM10	WEU0073	Gastric	0.836071	5818.95	5819.15	25.3798	6.92101	3.36244	229.283	2.65584e-05	5.7914e-08	FIRST_PASS
CM10	WEU0073	Gastric	0.836071	5885.74	5885.74	27.1503	1.25053	0.645552	216.784	2.671e-05	6.16254e-08	ESTIMATED
CM10	WEU0073	Gastric	0.836071	6201.92	6196.42	34.478	11.8312	8.11022	179.721	2.74058e-05	7.62295e-08	FIRST_PASS
CM10	WEU0073	Gastric	0.836071	6358.11	6352.3	39.0682	6.41062	5.08318	162.595	2.77484e-05	8.53327e-08	FIRST_PASS
CM10	WEU0073	Gastric	0.836071	6448.74	6448.74	288.982	2.37756	2.08546	22.3153	2.79583e-05	6.33093e-07	ESTIMATED
CM10	WEU0073	Gastric	0.836071	6699.18	6699.18	31.1085	0.89018	1.03357	215.349	2.8496e-05	6.61432e-08	ESTIMATED
CM10	WEU0073	Gastric	0.836071	7098.61	7098.61	99.9597	0.456687	0.516508	71.0147	2.93332e-05	2.07028e-07	ESTIMATED
CM10	WEU0073	Gastric	0.836071	7273.9	7261.46	35.9549	2.49983	2.79831	201.96	2.96678e-05	7.34234e-08	SECOND_PASS
CM10	WEU0073	Gastric	0.836071	7327.57	7327.57	202.204	1.00856	1.12434	36.2384	2.98025e-05	4.08832e-07	ESTIMATED
CM10	WEU0073	Gastric	0.836071	7371.7	7365.55	36.76	5.30274	5.8976	200.369	2.98797e-05	7.45476e-08	FIRST_PASS
CM10	WEU0073	Gastric	0.836071	7498.7	7475.67	43.8339	3.8903	4.2976	170.546	3.01022e-05	8.82711e-08	FIRST_PASS
CM10	WEU0073	Gastric	0.836071	7686.69	7676.83	35.4401	9.47693	8.54803	216.614	3.05045e-05	7.04009e-08	FIRST_PASS
CM10	WEU0073	Gastric	0.836071	8039.87	8031.34	30.3555	37.2119	20.7804	264.577	3.12009e-05	5.89566e-08	FIRST_PASS
CM10	WEU0073	Gastric	0.836071	8204.63	8200.63	30.5189	17.6164	8.34466	268.707	3.1528e-05	5.86653e-08	FIRST_PASS
CM10	WEU0073	Gastric	0.836071	8316.73	8312.85	33.1958	7.75841	3.34176	250.418	3.1743e-05	6.33826e-08	SECOND_PASS
CM10	WEU0073	Gastric	0.836071	8414.87	8414.87	49.4285	5.10606	2.0328	170.243	3.19372e-05	9.38003e-08	ESTIMATED
CM10	WEU0073	Gastric	0.836071	8485.43	8483.29	40.8003	11.6242	4.4052	207.922	3.20668e-05	7.71025e-08	FIRST_PASS
CM10	WEU0073	Gastric	0.836071	8577.95	8577.95	67.4737	7.46852	2.65453	127.13	3.22452e-05	1.26849e-07	ESTIMATED
CM10	WEU0073	Gastric	0.836071	8794.7	8794.7	34.5508	0.526579	0.164043	254.544	3.265e-05	6.41408e-08	ESTIMATED
CM10	WEU0073	Gastric	0.836071	8879.33	8879.33	46.1438	2.91171	0.914217	192.427	3.28067e-05	8.53025e-08	ESTIMATED
CM10	WEU0073	Gastric	0.836071	9114.7	9100.82	67.3506	10.5233	3.74889	135.126	3.32134e-05	1.22821e-07	FIRST_PASS
CM10	WEU0073	Gastric	0.836071	9515.82	9521.45	37.6333	7.352	3.49782	253.006	3.39723e-05	6.71411e-08	SECOND_PASS
CM10	WEU0073	Gastric	0.836071	9618.76	9618.76	399.04	3.14119	1.61835	24.1048	3.41454e-05	7.08271e-07	ESTIMATED
CM10	WEU0073	Gastric	0.836071	9788.19	9774.03	65.7742	29.5236	17.512	148.6	3.44199e-05	1.15742e-07	FIRST_PASS
CM10	WEU0073	Gastric	0.836071	9980.84	9980.84	543.131	8.4701	6.27735	18.3765	3.47822e-05	9.46377e-07	ESTIMATED
CM10	WEU0073	Gastric	0.836071	10079.5	10079.5	19.4732	5.95807	5.00687	517.609	3.49536e-05	3.375e-08	ESTIMATED
CM10	WEU0073	Gastric	0.836071	10117.5	10117.5	6.50136	4.31894	3.82638	1556.22	3.50196e-05	1.125e-08	ESTIMATED
CM10	WEU0073	Gastric	0.836071	10232.2	10231.9	160.45	12.0071	11.4482	63.7702	3.52169e-05	2.76019e-07	FIRST_PASS
CM10	WEU0073	Gastric	0.836071	10309.1	10309.1	128.887	6.71092	6.60723	79.986	3.53496e-05	2.2125e-07	ESTIMATED
CM10	WEU0073	Gastric	0.836071	10447.6	10447.6	63.8595	5.15277	5.38648	163.603	3.55862e-05	1.0875e-07	ESTIMATED
CM10	WEU0073	Gastric	0.836071	10570.1	10557.2	92.0895	11.7548	12.9156	114.641	3.57724e-05	1.5585e-07	FIRST_PASS
CM10	WEU0073	Gastric	0.836071	10681.8	10681.8	458.705	5.65643	6.59597	23.287	3.59829e-05	7.72597e-07	ESTIMATED
CM10	WEU0073	Gastric	0.836071	10806	10783.9	47.2778	15.0676	18.4943	228.097	3.61545e-05	7.92309e-08	FIRST_PASS
CM10	WEU0073	Gastric	0.836071	10869.9	10858.4	75.9649	7.10207	9.06317	142.939	3.6279e-05	1.26903e-07	SECOND_PASS
CM10	WEU0073	Gastric	0.836071	10982.1	10991.3	122.969	4.29755	5.90044	89.3826	3.65004e-05	2.04181e-07	SECOND_PASS
CM10	WEU0073	Gastric	0.836071	11090.1	11090.1	379.086	2.10764	3.06584	29.2549	3.66641e-05	6.26632e-07	ESTIMATED
CM10	WEU0073	Gastric	0.836071	11782.6	11758.2	95.8095	19.752	47.1687	122.725	3.77523e-05	1.5367e-07	FIRST_PASS
CM10	WEU0073	Gastric	0.836071	11984.7	11971.4	254.411	7.48849	22.2407	47.0554	3.8093e-05	4.04768e-07	SECOND_PASS
CM10	WEU0073	Gastric	0.836071	12300	12300	1161.38	1.9031	5.91399	10.5908	3.86123e-05	1.85613e-06	ESTIMATED
CM10	WEU0073	Gastric	0.836071	12731.2	12731.2	302.823	0.521625	1.7242	42.0419	3.92833e-05	4.67193e-07	ESTIMATED
CM10	WEU0073	Gastric	0.836071	13373.5	13387.7	74.3088	3.58499	13.0923	180.162	4.02833e-05	1.11799e-07	FIRST_PASS
CM10	WEU0073	Gastric	0.836071	13803	13803	195.088	0.128951	0.503676	70.753	4.09035e-05	2.89058e-07	ESTIMATED
CM10	WEU0073	Gastric	0.836071	13913.6	13913.6	122.455	0.456577	1.81666	113.622	4.1067e-05	1.80921e-07	ESTIMATED
CM10	WEU0073	Gastric	0.836071	14136.2	14136.2	100.151	0.44852	1.88214	141.149	4.13942e-05	1.46499e-07	ESTIMATED
CM10	WEU0073	Gastric	0.836071	14724.3	14717.2	51.0946	1.89975	9.84097	288.038	4.22363e-05	7.33167e-08	FIRST_PASS
CM10	WEU0073	Gastric	0.836071	15152.9	15152.9	214.897	0.389999	2.44222	70.5125	4.28569e-05	3.03896e-07	ESTIMATED
CM10	WEU0073	Gastric	0.836071	15310.6	15310.6	338.941	0.33749	2.28439	45.1718	4.30793e-05	4.76838e-07	ESTIMATED
CM10	WEU0073	Gastric	0.836071	15864.9	15864.9	58.4603	0.16181	1.23709	271.379	4.38522e-05	8.0771e-08	ESTIMATED
CM10	WEU0073	Gastric	0.836071	16033.6	16033.6	40.3729	0.105977	0.743088	397.137	4.40847e-05	5.55126e-08	ESTIMATED
CM10	WEU0073	Gastric	0.836071	16672.7	16672.7	154.235	3.91652	26.814	108.1	4.49548e-05	2.07932e-07	ESTIMATED
CM10	WEU0073	Gastric	0.836071	16824.4	16821.8	97.7595	15.3312	107.338	172.073	4.51553e-05	1.3121e-07	FIRST_PASS
CM10	WEU0073	Gastric	0.836071	16960.1	16962.2	84.2034	39.1511	280.054	201.444	4.53434e-05	1.12527e-07	FIRST_PASS
CM10	WEU0073	Gastric	0.836071	17122.2	17112	210.201	19.5999	143.507	81.408	4.55432e-05	2.79722e-07	FIRST_PASS
CM10	WEU0073	Gastric	0.836071	17164.7	17164.7	458.669	16.6159	122.672	37.4227	4.56132e-05	6.12233e-07	ESTIMATED
CM10	WEU0073	Gastric	0.836071	17320.2	17311.8	93.5838	10.1106	76.419	184.987	4.58083e-05	1.2375e-07	FIRST_PASS
CM10	WEU0073	Gastric	0.836071	17500.5	17496.3	68.4004	6.05916	47.1969	255.793	4.60518e-05	9e-08	FIRST_PASS
CM10	WEU0073	Gastric	0.836071	17650.4	17624.6	563.58	5.13741	40.8821	31.2726	4.62203e-05	7.38991e-07	SECOND_PASS
CM10	WEU0073	Gastric	0.836071	18111.6	18111.6	33.8382	1.59672	13.8314	535.242	4.68545e-05	4.375e-08	ESTIMATED
CM10	WEU0073	Gastric	0.836071	18178.6	18178.6	63.8961	1.58426	13.8915	284.502	4.69411e-05	8.25e-08	ESTIMATED
CM10	WEU0073	Gastric	0.836071	18269.1	18269.1	578.276	1.24163	11.0697	31.5923	4.70578e-05	7.44766e-07	ESTIMATED
CM10	WEU0073	Gastric	0.836071	18751.1	18751.1	176.072	0.647447	6.33364	106.497	4.76745e-05	2.2375e-07	ESTIMATED
CM10	WEU0073	Gastric	0.836071	19150.3	19150.3	650.934	0.434946	4.62279	29.4196	4.81793e-05	8.18828e-07	ESTIMATED
CM10	WEU0073	Gastric	0.836071	20592.5	20601.8	98.5277	1.80734	22.3927	209.097	4.99719e-05	1.19486e-07	FIRST_PASS
CM10	WEU0073	Gastric	0.836071	20980.4	20980.4	49.3731	0.0268932	0.265546	424.936	5.0429e-05	5.93372e-08	ESTIMATED
CM10	WEU0073	Gastric	0.836071	21216.4	21216.4	58.7255	0.103801	1.39331	361.28	5.07117e-05	7.01987e-08	ESTIMATED
CM10	WEU0073	Gastric	0.836071	21364.9	21364.9	224.761	0.128684	2.07703	95.056	5.08889e-05	2.67679e-07	ESTIMATED
CM10	WEU0073	Gastric	0.836071	22355.1	22401.4	120.497	2.06226	33.2859	185.909	5.21087e-05	1.4e-07	FIRST_PASS
CM10	WEU0073	Gastric	0.836071	23650.4	23624.2	922.844	11.5054	185.703	25.5994	5.35121e-05	1.04255e-06	FIRST_PASS
CM10	WEU0080	Gastric	1.66993	1507.55	1507.31	24.3533	40.8226	7.60603	61.8935	1.35168e-05	1.09194e-07	FIRST_PASS
CM10	WEU0080	Gastric	1.66993	1733.86	1733.52	19.7545	36.5611	6.68699	87.7535	1.44957e-05	8.26287e-08	FIRST_PASS
CM10	WEU0080	Gastric	1.66993	1754.42	1754.75	49.0916	27.1424	5.01305	35.7444	1.45841e-05	2.04006e-07	SECOND_PASS
CM10	WEU0080	Gastric	1.66993	1954.32	1954.32	11.7483	16.7361	3.39494	166.35	1.53912e-05	4.625e-08	ESTIMATED
CM10	WEU0080	Gastric	1.66993	1977.43	1977.43	7.98139	15.7289	3.2263	247.755	1.54819e-05	3.125e-08	ESTIMATED
CM10	WEU0080	Gastric	1.66993	1996.56	1996.56	63.8713	32.3613	6.69956	31.2591	1.55566e-05	2.47639e-07	ESTIMATED
CM10	WEU0080	Gastric	1.66993	2203.66	2203.66	76.7709	10.233	2.34821	28.7043	1.63435e-05	2.84687e-07	ESTIMATED
CM10	WEU0080	Gastric	1.66993	2222.28	2222.88	29.5329	17.716	4.10563	75.2679	1.64146e-05	1.09041e-07	SECOND_PASS
CM10	WEU0080	Gastric	1.66993	2240.07	2240.07	116.288	12.1137	2.83228	19.263	1.6478e-05	4.2771e-07	ESTIMATED
CM10	WEU0080	Gastric	1.66993	2385.78	2385.78	6.78483	0.670806	0.166217	351.634	1.70055e-05	2.41682e-08	ESTIMATED
CM10	WEU0080	Gastric	1.66993	2447.38	2447.38	98.3742	5.60939	1.41953	24.8783	1.72236e-05	3.43743e-07	ESTIMATED
CM10	WEU0080	Gastric	1.66993	2544.27	2544.27	0.728962	1.34306	0.35146	3490.27	1.75612e-05	2.51574e-09	ESTIMATED
CM10	WEU0080	Gastric	1.66993	2578.52	2578.52	0.365478	-0.81691	-0.216347	7055.18	1.7679e-05	1.25281e-09	ESTIMATED
CM10	WEU0080	Gastric	1.66993	2802.49	2802.49	6.16584	1.9667	0.556486	454.519	1.84308e-05	2.02747e-08	ESTIMATED
CM10	WEU0080	Gastric	1.66993	2954.6	2954.6	5.73462	5.32183	1.54252	515.221	1.89244e-05	1.83678e-08	ESTIMATED
CM10	WEU0080	Gastric	1.66993	3005.81	3005.81	15.8598	2.26742	0.662548	189.524	1.90877e-05	5.0357e-08	ESTIMATED
CM10	WEU0080	Gastric	1.66993	3031.71	3031.71	63.006	1.80571	0.529801	48.1177	1.91698e-05	1.99196e-07	ESTIMATED
CM10	WEU0080	Gastric	1.66993	3101.32	3101.32	6.45339	1.32769	0.393855	480.572	1.93886e-05	2.01646e-08	ESTIMATED
CM10	WEU0080	Gastric	1.66993	3360.52	3362.7	23.9223	58.743	14.039	140.568	2.01891e-05	7.18099e-08	FIRST_PASS
CM10	WEU0080	Gastric	1.66993	3380.96	3380.96	43.7659	15.7352	3.65607	77.251	2.02438e-05	1.31305e-07	ESTIMATED
CM10	WEU0080	Gastric	1.66993	3454.61	3454.61	61.0023	4.13597	0.86473	56.6308	2.04632e-05	1.80672e-07	ESTIMATED
CM10	WEU0080	Gastric	1.66993	3484.03	3484.03	37.3475	8.04803	1.61839	93.2867	2.05501e-05	1.10255e-07	ESTIMATED
CM10	WEU0080	Gastric	1.66993	3590.56	3590.28	25.7746	172.049	30.439	139.295	2.08611e-05	7.48813e-08	FIRST_PASS
CM10	WEU0080	Gastric	1.66993	3722.3	3722.3	302.313	4.67021	0.72043	12.3128	2.12412e-05	8.66936e-07	ESTIMATED
CM10	WEU0080	Gastric	1.66993	3905.3	3905.23	25.1236	33.5638	5.26954	155.441	2.17569e-05	6.99833e-08	FIRST_PASS
CM10	WEU0080	Gastric	1.66993	3933.25	3933.25	62.9325	4.20462	0.664936	62.4996	2.18348e-05	1.75129e-07	ESTIMATED
CM10	WEU0080	Gastric	1.66993	4037.3	4037.3	30.5747	6.50741	1.05747	132.047	2.21217e-05	8.37188e-08	ESTIMATED
CM10	WEU0080	Gastric	1.66993	4065.01	4065.01	4.77523	4.81811	0.788692	851.271	2.21975e-05	1.30379e-08	ESTIMATED
CM10	WEU0080	Gastric	1.66993	4146.61	4146.61	80.0109	6.91227	1.15629	51.8255	2.24192e-05	2.17146e-07	ESTIMATED
CM10	WEU0080	Gastric	1.66993	4211.79	4211.79	35.2797	10.3156	1.75608	119.383	2.25947e-05	9.46825e-08	ESTIMATED
CM10	WEU0080	Gastric	1.66993	4376.6	4376.6	139.228	23.973	4.2691	31.4348	2.30325e-05	3.66609e-07	ESTIMATED
CM10	WEU0080	Gastric	1.66993	4489.19	4489.19	43.3475	13.5128	2.4833	103.563	2.33269e-05	1.125e-07	ESTIMATED
CM10	WEU0080	Gastric	1.66993	4555.41	4555.41	10.6667	8.50899	1.5934	427.068	2.34983e-05	2.75e-08	ESTIMATED
CM10	WEU0080	Gastric	1.66993	4585.09	4585.09	63.4689	7.71223	1.45651	72.2415	2.35747e-05	1.63166e-07	ESTIMATED
CM10	WEU0080	Gastric	1.66993	4645.37	4645.37	50.2666	7.21362	1.42169	92.4145	2.37292e-05	1.28423e-07	ESTIMATED
CM10	WEU0080	Gastric	1.66993	4698.93	4698.93	39.5406	5.20347	1.07311	118.838	2.38656e-05	1.00426e-07	ESTIMATED
CM10	WEU0080	Gastric	1.66993	4767.2	4767.2	34.0825	6.47537	1.41878	139.872	2.40384e-05	8.59732e-08	ESTIMATED
CM10	WEU0080	Gastric	1.66993	4908.07	4908.07	22.3869	1.549	0.388958	219.238	2.43909e-05	5.56179e-08	ESTIMATED
CM10	WEU0080	Gastric	1.66993	4976.17	4976.17	75.7266	3.62437	0.978422	65.7122	2.45596e-05	1.86543e-07	ESTIMATED
CM10	WEU0080	Gastric	1.66993	5084.44	5084.44	19.6278	2.16928	0.664219	259.043	2.48253e-05	4.79174e-08	ESTIMATED
CM10	WEU0080	Gastric	1.66993	5303.71	5303.71	42.0603	2.66463	1.00165	126.098	2.53549e-05	1.00537e-07	ESTIMATED
CM10	WEU0080	Gastric	1.66993	5402.2	5402.2	28.5824	7.94526	3.1583	189.005	2.55893e-05	6.76949e-08	ESTIMATED
CM10	WEU0080	Gastric	1.66993	5524.52	5524.52	31.4764	7.58715	3.2452	175.513	2.58774e-05	7.37191e-08	ESTIMATED
CM10	WEU0080	Gastric	1.66993	5619.57	5619.57	7.45118	1.19016	0.54068	754.186	2.6099e-05	1.73055e-08	ESTIMATED
CM10	WEU0080	Gastric	1.66993	5709.09	5709.09	10.9258	1.17413	0.566257	522.534	2.63061e-05	2.51662e-08	ESTIMATED
CM10	WEU0080	Gastric	1.66993	5818.95	5818.95	3.73405	0.953565	0.45959	1558.35	2.6558e-05	8.52035e-09	ESTIMATED
CM10	WEU0080	Gastric	1.66993	5885.74	5889.25	25.4127	8.45687	3.97908	231.744	2.67179e-05	5.76361e-08	FIRST_PASS
CM10	WEU0080	Gastric	1.66993	6201.92	6206.66	36.0132	33.1478	14.1068	172.344	2.74285e-05	7.95802e-08	FIRST_PASS
CM10	WEU0080	Gastric	1.66993	6358.11	6358.11	132.273	5.87212	2.39206	48.0681	2.77611e-05	2.87692e-07	ESTIMATED
CM10	WEU0080	Gastric	1.66993	6448.74	6432.19	68.8908	8.39869	3.35174	93.368	2.79224e-05	1.49568e-07	FIRST_PASS
CM10	WEU0080	Gastric	1.66993	6699.18	6699.18	19.6116	2.35001	0.946089	341.592	2.8496e-05	4.17105e-08	ESTIMATED
CM10	WEU0080	Gastric	1.66993	7098.61	7098.61	50.0917	16.9975	7.42051	141.712	2.93332e-05	1.03496e-07	ESTIMATED
CM10	WEU0080	Gastric	1.66993	7273.9	7273.9	3.6748	8.48327	3.84293	1979.4	2.96932e-05	7.5e-09	ESTIMATED
CM10	WEU0080	Gastric	1.66993	7327.57	7327.57	126.842	12.3554	5.66175	57.7691	2.98025e-05	2.57945e-07	ESTIMATED
CM10	WEU0080	Gastric	1.66993	7371.7	7349.3	104.815	15.0143	6.9125	70.1169	2.98467e-05	2.13044e-07	FIRST_PASS
CM10	WEU0080	Gastric	1.66993	7498.7	7498.7	283.086	2.90579	1.38216	26.4891	3.01485e-05	5.69074e-07	ESTIMATED
CM10	WEU0080	Gastric	1.66993	7686.69	7686.69	42.3446	2.92847	1.45287	181.527	3.05241e-05	8.40413e-08	ESTIMATED
CM10	WEU0080	Gastric	1.66993	8039.87	8039.87	27.9168	0.0299235	0.0168318	287.994	3.12174e-05	5.41801e-08	ESTIMATED
CM10	WEU0080	Gastric	1.66993	8204.63	8210.22	26.1105	3.20705	1.9359	314.442	3.15464e-05	5.01677e-08	SECOND_PASS
CM10	WEU0080	Gastric	1.66993	8316.73	8316.73	30.3304	1.28528	0.812701	274.204	3.17504e-05	5.78739e-08	ESTIMATED
CM10	WEU0080	Gastric	1.66993	8414.87	8414.87	48.832	2.8103	1.85781	172.323	3.19372e-05	9.26481e-08	ESTIMATED
CM10	WEU0080	Gastric	1.66993	8485.43	8490.19	41.2932	12.9577	8.87417	205.608	3.20798e-05	7.7996e-08	FIRST_PASS
CM10	WEU0080	Gastric	1.66993	8577.95	8592.67	64.6824	5.27695	3.79894	132.844	3.22728e-05	1.21426e-07	SECOND_PASS
CM10	WEU0080	Gastric	1.66993	8794.7	8794.7	3.28575	0.583544	0.451294	2676.62	3.265e-05	6.09911e-09	ESTIMATED
CM10	WEU0080	Gastric	1.66993	8879.33	8879.33	541.752	0.645745	0.497895	16.39	3.28067e-05	9.90366e-07	ESTIMATED
CM10	WEU0080	Gastric	1.66993	9114.7	9104.5	95.7458	5.16878	3.95396	95.0903	3.32201e-05	1.74613e-07	FIRST_PASS
CM10	WEU0080	Gastric	1.66993	9515.82	9515.82	42.9283	0.225822	0.170338	221.668	3.39622e-05	7.66508e-08	ESTIMATED
CM10	WEU0080	Gastric	1.66993	9618.76	9618.76	10.4561	1.02455	0.77017	919.918	3.41454e-05	1.8559e-08	ESTIMATED
CM10	WEU0080	Gastric	1.66993	9788.19	9782.98	137.081	15.8889	11.8795	71.3663	3.44357e-05	2.40782e-07	FIRST_PASS
CM10	WEU0080	Gastric	1.66993	9980.84	9980.84	501.185	7.74246	5.69783	19.9145	3.47822e-05	8.73288e-07	ESTIMATED
CM10	WEU0080	Gastric	1.66993	10079.5	10079.5	16.5746	6.89308	5.02726	608.128	3.49536e-05	2.875e-08	ESTIMATED
CM10	WEU0080	Gastric	1.66993	10117.5	10117.5	158.651	10.6339	7.72883	63.7722	3.50196e-05	2.7375e-07	ESTIMATED
CM10	WEU0080	Gastric	1.66993	10232.2	10238.5	53.1688	27.4077	19.7059	192.565	3.52282e-05	9.14708e-08	FIRST_PASS
CM10	WEU0080	Gastric	1.66993	10309.1	10308.1	175.545	18.8148	13.4448	58.7207	3.53479e-05	3.00983e-07	SECOND_PASS
CM10	WEU0080	Gastric	1.66993	10447.6	10447.6	141.231	11.4334	8.07152	73.9755	3.55862e-05	2.4e-07	ESTIMATED
CM10	WEU0080	Gastric	1.66993	10570.1	10536.3	212.413	17.6099	12.3378	49.6028	3.57369e-05	3.6023e-07	FIRST_PASS
CM10	WEU0080	Gastric	1.66993	10681.8	10681.8	57.2195	7.45616	5.16012	186.682	3.59829e-05	9.625e-08	ESTIMATED
CM10	WEU0080	Gastric	1.66993	10806	10806	90.4852	5.60571	3.83977	119.422	3.61913e-05	1.5125e-07	ESTIMATED
CM10	WEU0080	Gastric	1.66993	10869.9	10876.2	54.8207	17.4926	11.9133	198.396	3.63087e-05	9.14968e-08	FIRST_PASS
CM10	WEU0080	Gastric	1.66993	10982.1	10982.1	21.8305	4.54435	3.06849	503.063	3.64851e-05	3.625e-08	ESTIMATED
CM10	WEU0080	Gastric	1.66993	11090.1	11090.1	319.837	5.377	3.59951	34.6743	3.66641e-05	5.28694e-07	ESTIMATED
CM10	WEU0080	Gastric	1.66993	11782.6	11773.4	37.6376	37.2287	31.0397	312.81	3.77767e-05	6.03847e-08	FIRST_PASS
CM10	WEU0080	Gastric	1.66993	11984.7	11983.2	75.3499	6.4443	6.67222	159.034	3.81118e-05	1.19817e-07	FIRST_PASS
CM10	WEU0080	Gastric	1.66993	12300	12300	965.645	1.30582	1.73573	12.7376	3.86123e-05	1.53481e-06	ESTIMATED
CM10	WEU0080	Gastric	1.66993	12731.2	12727.8	144.092	2.04169	3.53258	88.3309	3.9278e-05	2.21879e-07	FIRST_PASS
CM10	WEU0080	Gastric	1.66993	13373.5	13407.8	107.86	5.94672	16.0216	124.308	4.03136e-05	1.62031e-07	FIRST_PASS
CM10	WEU0080	Gastric	1.66993	13803	13803	1083.5	1.12465	3.55811	12.7393	4.09035e-05	1.60541e-06	ESTIMATED
CM10	WEU0080	Gastric	1.66993	13913.6	13913.6	284.502	0.713183	2.37084	48.905	4.1067e-05	4.19865e-07	ESTIMATED
CM10	WEU0080	Gastric	1.66993	14136.2	14136.2	66.4783	0.189696	0.701919	212.644	4.13942e-05	9.73323e-08	ESTIMATED
CM10	WEU0080	Gastric	1.66993	14724.3	14725.7	45.7964	8.37072	34.3977	321.547	4.22484e-05	6.56961e-08	FIRST_PASS
CM10	WEU0080	Gastric	1.66993	15152.9	15152.9	1185.42	0.511872	2.14952	12.7827	4.28569e-05	1.67636e-06	ESTIMATED
CM10	WEU0080	Gastric	1.66993	15310.6	15359.8	218.259	1.33059	5.64688	70.3744	4.31486e-05	3.05866e-07	FIRST_PASS
CM10	WEU0080	Gastric	1.66993	15864.9	15864.9	719.227	0.79505	3.54782	22.0583	4.38522e-05	1.00379e-06	ESTIMATED
CM10	WEU0080	Gastric	1.66993	16033.6	16033.6	116.376	0.344436	1.57837	137.773	4.40847e-05	1.60213e-07	ESTIMATED
CM10	WEU0080	Gastric	1.66993	16672.7	16672.7	135.06	2.32978	11.4824	123.447	4.49548e-05	1.82082e-07	ESTIMATED
CM10	WEU0080	Gastric	1.66993	16824.4	16834.5	88.5118	10.8484	54.104	190.195	4.51725e-05	1.18753e-07	FIRST_PASS
CM10	WEU0080	Gastric	1.66993	16960.1	16975.3	80.6169	37.3372	188.153	210.567	4.53609e-05	1.07687e-07	FIRST_PASS
CM10	WEU0080	Gastric	1.66993	17122.2	17122.2	619.424	13.3493	68.0077	27.6421	4.55567e-05	8.24374e-07	ESTIMATED
CM10	WEU0080	Gastric	1.66993	17164.7	17176	154.1	15.7271	80.4431	111.46	4.56282e-05	2.04684e-07	FIRST_PASS
CM10	WEU0080	Gastric	1.66993	17320.2	17323.4	85.0915	8.9353	46.2107	203.585	4.58236e-05	1.125e-07	FIRST_PASS
CM10	WEU0080	Gastric	1.66993	17500.5	17506.9	81.7195	8.15117	42.7428	214.231	4.60657e-05	1.075e-07	FIRST_PASS
CM10	WEU0080	Gastric	1.66993	17650.4	17652.4	98.3273	6.38617	33.8601	179.528	4.62568e-05	1.2875e-07	FIRST_PASS
CM10	WEU0080	Gastric	1.66993	18111.6	18111.6	24.1662	2.87851	15.8124	749.458	4.68545e-05	3.125e-08	ESTIMATED
CM10	WEU0080	Gastric	1.66993	18178.6	18178.6	53.2716	2.9222	16.1366	341.244	4.69411e-05	6.875e-08	ESTIMATED
CM10	WEU0080	Gastric	1.66993	18269.1	18269.1	587.044	2.38356	13.256	31.1205	4.70578e-05	7.56058e-07	ESTIMATED
CM10	WEU0080	Gastric	1.66993	18751.1	18751.1	318.659	0.915733	5.29208	58.8437	4.76745e-05	4.05094e-07	ESTIMATED
CM10	WEU0080	Gastric	1.66993	19150.3	19150.3	267.159	0.259524	1.54943	71.6812	4.81793e-05	3.36067e-07	ESTIMATED
CM10	WEU0080	Gastric	1.66993	20592.5	20609.4	82.419	2.94955	20.2727	250.056	4.99811e-05	9.99178e-08	FIRST_PASS
CM10	WEU0080	Gastric	1.66993	20980.4	20976.8	119.942	1.42688	10.2086	174.891	5.04246e-05	1.44127e-07	FIRST_PASS
CM10	WEU0080	Gastric	1.66993	21216.4	21196.8	300.684	0.741782	5.43944	70.4951	5.06883e-05	3.59517e-07	SECOND_PASS
CM10	WEU0080	Gastric	1.66993	21364.9	21364.9	1664.49	0.463534	3.46481	12.8357	5.08889e-05	2.01552e-06	ESTIMATED
CM10	WEU0080	Gastric	1.66993	22355.1	22347.3	119.552	0.245176	1.95515	186.926	5.20458e-05	1.39178e-07	SECOND_PASS
CM10	WEU0080	Gastric	1.66993	23650.4	23726.4	709.831	0.487749	5.65568	33.4254	5.36277e-05	8.02199e-07	FIRST_PASS
CM10	WEU0081	Gastric	1.25024	1507.55	1507.55	54.0844	33.5658	6.14882	27.874	1.35179e-05	2.42482e-07	ESTIMATED
CM10	WEU0081	Gastric	1.25024	1733.86	1733.86	75.7658	25.3709	4.53223	22.8845	1.44971e-05	3.16034e-07	ESTIMATED
CM10	WEU0081	Gastric	1.25024	1754.42	1751.38	49.8256	31.407	5.57406	35.1501	1.45701e-05	2.07255e-07	FIRST_PASS
CM10	WEU0081	Gastric	1.25024	1954.32	1954.32	50.0478	12.3777	2.04727	39.0491	1.53912e-05	1.97074e-07	ESTIMATED
CM10	WEU0081	Gastric	1.25024	1977.43	1977.43	4.46832	18.8959	3.10206	442.545	1.54819e-05	1.75e-08	ESTIMATED
CM10	WEU0081	Gastric	1.25024	1996.56	1996.56	97.9117	27.1763	4.43418	20.3914	1.55566e-05	3.81449e-07	ESTIMATED
CM10	WEU0081	Gastric	1.25024	2203.66	2203.66	90.4004	8.55493	1.38473	24.3766	1.63435e-05	3.35229e-07	ESTIMATED
CM10	WEU0081	Gastric	1.25024	2222.28	2222.28	9.13864	12.1973	1.9829	243.174	1.64124e-05	3.375e-08	ESTIMATED
CM10	WEU0081	Gastric	1.25024	2240.07	2240.07	127.166	13.3051	2.17202	17.6153	1.6478e-05	4.67716e-07	ESTIMATED
CM10	WEU0081	Gastric	1.25024	2385.78	2385.78	16.044	7.10568	1.20021	148.703	1.70055e-05	5.71856e-08	ESTIMATED
CM10	WEU0081	Gastric	1.25024	2447.38	2447.38	115.273	4.80847	0.824013	21.2311	1.72236e-05	4.03332e-07	ESTIMATED
CM10	WEU0081	Gastric	1.25024	2544.27	2544.27	47.4294	10.3698	1.81799	53.6434	1.75612e-05	1.63082e-07	ESTIMATED
CM10	WEU0081	Gastric	1.25024	2578.52	2571.66	18.9739	17.7523	3.13241	135.537	1.76555e-05	6.51395e-08	FIRST_PASS
CM10	WEU0081	Gastric	1.25024	2802.49	2802.49	18.4513	6.2271	1.16727	151.886	1.84308e-05	6.07297e-08	ESTIMATED
CM10	WEU0081	Gastric	1.25024	2954.6	2954.6	71.673	5.85685	1.23094	41.2232	1.89244e-05	2.29826e-07	ESTIMATED
CM10	WEU0081	Gastric	1.25024	3005.81	3005.81	23.0558	3.73568	0.817931	130.371	1.90877e-05	7.32054e-08	ESTIMATED
CM10	WEU0081	Gastric	1.25024	3031.71	3031.71	37.659	6.1185	1.36838	80.5041	1.91698e-05	1.19061e-07	ESTIMATED
CM10	WEU0081	Gastric	1.25024	3101.32	3101.32	6.13737	3.06016	0.725906	505.317	1.93886e-05	1.9189e-08	ESTIMATED
CM10	WEU0081	Gastric	1.25024	3360.52	3354.95	24.5131	12.218	3.52188	136.863	2.01658e-05	7.36372e-08	FIRST_PASS
CM10	WEU0081	Gastric	1.25024	3380.96	3380.96	5.13269	1.27442	0.363402	658.711	2.02438e-05	1.53689e-08	ESTIMATED
CM10	WEU0081	Gastric	1.25024	3454.61	3454.61	6.39101	1.93279	0.534943	540.543	2.04632e-05	1.89284e-08	ESTIMATED
CM10	WEU0081	Gastric	1.25024	3484.03	3484.03	64.1654	6.24719	1.70914	54.2976	2.05501e-05	1.89009e-07	ESTIMATED
CM10	WEU0081	Gastric	1.25024	3590.56	3596.22	33.3565	13.2692	3.47905	107.812	2.08784e-05	9.68925e-08	FIRST_PASS
CM10	WEU0081	Gastric	1.25024	3722.3	3718.05	41.8572	31.1883	7.82882	88.8271	2.12291e-05	1.19351e-07	FIRST_PASS
CM10	WEU0081	Gastric	1.25024	3905.3	3905.3	22.9165	1.3353	0.314979	170.414	2.1757e-05	6.38357e-08	ESTIMATED
CM10	WEU0081	Gastric	1.25024	3933.25	3933.25	20.5571	1.94449	0.454642	191.333	2.18348e-05	5.70596e-08	ESTIMATED
CM10	WEU0081	Gastric	1.25024	4037.3	4037.3	27.2641	3.18819	0.744319	148.081	2.21217e-05	7.48124e-08	ESTIMATED
CM10	WEU0081	Gastric	1.25024	4065.01	4065.01	29.4505	1.55864	0.367151	138.029	2.21975e-05	8.05099e-08	ESTIMATED
CM10	WEU0081	Gastric	1.25024	4146.61	4142.33	41.0371	9.35669	2.26031	100.941	2.24076e-05	1.10908e-07	SECOND_PASS
CM10	WEU0081	Gastric	1.25024	4211.79	4211.79	40.8158	7.58795	1.87568	103.19	2.25947e-05	1.09477e-07	ESTIMATED
CM10	WEU0081	Gastric	1.25024	4376.6	4377.84	22.4878	211.832	55.4015	194.676	2.30358e-05	5.91587e-08	FIRST_PASS
CM10	WEU0081	Gastric	1.25024	4489.19	4488.04	29.8914	9.58768	2.6063	150.145	2.33239e-05	7.76653e-08	SECOND_PASS
CM10	WEU0081	Gastric	1.25024	4555.41	4550.3	27.8439	21.3967	5.94755	163.422	2.34851e-05	7.18692e-08	FIRST_PASS
CM10	WEU0081	Gastric	1.25024	4585.09	4587.72	33.0113	17.9137	5.04739	138.974	2.35815e-05	8.48185e-08	SECOND_PASS
CM10	WEU0081	Gastric	1.25024	4645.37	4645.37	1.46831	-0.691846	-0.199103	3163.76	2.37292e-05	3.75e-09	ESTIMATED
CM10	WEU0081	Gastric	1.25024	4698.93	4698.93	29.9917	-0.0853509	-0.0251921	156.674	2.38656e-05	7.625e-08	ESTIMATED
CM10	WEU0081	Gastric	1.25024	4767.2	4763.83	23.4481	187.942	57.6556	203.165	2.40299e-05	5.9138e-08	FIRST_PASS
CM10	WEU0081	Gastric	1.25024	4908.07	4908.07	44.4303	6.92636	2.32603	110.467	2.43909e-05	1.1045e-07	ESTIMATED
CM10	WEU0081	Gastric	1.25024	4976.17	4972.73	39.5063	16.51	5.7875	125.872	2.45511e-05	9.74956e-08	FIRST_PASS
CM10	WEU0081	Gastric	1.25024	5084.44	5084.44	8.24515	0.0193555	0.0073357	616.659	2.48253e-05	2.01319e-08	ESTIMATED
CM10	WEU0081	Gastric	1.25024	5303.71	5303.71	39.1209	1.2756	0.573323	135.572	2.53549e-05	9.35108e-08	ESTIMATED
CM10	WEU0081	Gastric	1.25024	5402.2	5402.2	91.9976	4.32497	2.11811	58.7212	2.55893e-05	2.17888e-07	ESTIMATED
CM10	WEU0081	Gastric	1.25024	5524.52	5524.52	106.565	7.23721	3.6533	51.8416	2.58774e-05	2.4909e-07	ESTIMATED
CM10	WEU0081	Gastric	1.25024	5619.57	5619.57	92.0494	3.5337	1.7982	61.0495	2.6099e-05	2.13753e-07	ESTIMATED
CM10	WEU0081	Gastric	1.25024	5709.09	5709.09	33.7771	4.18106	2.14379	169.022	2.63061e-05	7.77456e-08	ESTIMATED
CM10	WEU0081	Gastric	1.25024	5818.95	5818.95	84.4555	3.58061	1.85306	68.8997	2.6558e-05	1.92365e-07	ESTIMATED
CM10	WEU0081	Gastric	1.25024	5885.74	5885.74	38.3998	2.41376	1.25626	153.275	2.671e-05	8.71307e-08	ESTIMATED
CM10	WEU0081	Gastric	1.25024	6201.92	6204.23	32.6295	8.25794	4.66855	190.142	2.74231e-05	7.21083e-08	FIRST_PASS
CM10	WEU0081	Gastric	1.25024	6358.11	6358.11	81.3466	3.22364	1.97702	78.1608	2.77611e-05	1.77211e-07	ESTIMATED
CM10	WEU0081	Gastric	1.25024	6448.74	6448.74	29.1117	0.75037	0.484143	221.517	2.79583e-05	6.31064e-08	ESTIMATED
CM10	WEU0081	Gastric	1.25024	6699.18	6699.18	2.55735	0.126989	0.0893572	2619.58	2.8496e-05	5.43877e-09	ESTIMATED
CM10	WEU0081	Gastric	1.25024	7098.61	7098.61	87.283	1.13011	0.79307	81.3286	2.93332e-05	1.80702e-07	ESTIMATED
CM10	WEU0081	Gastric	1.25024	7273.9	7260.14	35.3408	8.15111	5.83421	205.432	2.96651e-05	7.22058e-08	FIRST_PASS
CM10	WEU0081	Gastric	1.25024	7327.57	7327.57	368.397	0.775247	0.570459	19.8904	2.98025e-05	7.49169e-07	ESTIMATED
CM10	WEU0081	Gastric	1.25024	7371.7	7371.7	67.7532	1.20233	0.901214	108.802	2.98921e-05	1.37167e-07	ESTIMATED
CM10	WEU0081	Gastric	1.25024	7498.7	7491.24	53.9481	3.87415	3.05739	138.86	3.01335e-05	1.08634e-07	SECOND_PASS
CM10	WEU0081	Gastric	1.25024	7686.69	7699.56	31.395	2.3803	2.0668	245.248	3.05496e-05	6.23331e-08	SECOND_PASS
CM10	WEU0081	Gastric	1.25024	8039.87	8047.93	30.2233	5.56794	4.86752	266.283	3.12331e-05	5.86504e-08	FIRST_PASS
CM10	WEU0081	Gastric	1.25024	8204.63	8202.09	29.444	36.8091	29.9223	278.566	3.15308e-05	5.65957e-08	FIRST_PASS
CM10	WEU0081	Gastric	1.25024	8316.73	8313.71	32.1556	21.0618	16.3003	258.546	3.17446e-05	6.13879e-08	FIRST_PASS
CM10	WEU0081	Gastric	1.25024	8414.87	8412.7	52.6617	11.7263	8.70739	159.75	3.19331e-05	9.99256e-08	FIRST_PASS
CM10	WEU0081	Gastric	1.25024	8485.43	8485.03	63.8553	14.9149	10.758	132.879	3.207e-05	1.2062e-07	FIRST_PASS
CM10	WEU0081	Gastric	1.25024	8577.95	8586.43	56.9881	9.30913	6.45682	150.67	3.22611e-05	1.07058e-07	FIRST_PASS
CM10	WEU0081	Gastric	1.25024	8794.7	8794.7	1343.6	2.70173	1.73807	6.54561	3.265e-05	2.49404e-06	ESTIMATED
CM10	WEU0081	Gastric	1.25024	8879.33	8886.59	68.7091	9.69146	6.04308	129.336	3.28201e-05	1.26884e-07	FIRST_PASS
CM10	WEU0081	Gastric	1.25024	9114.7	9107.89	115.639	12.9291	7.51077	78.7614	3.32263e-05	2.10692e-07	FIRST_PASS
CM10	WEU0081	Gastric	1.25024	9515.82	9515.82	1439.54	6.0839	3.14472	6.61031	3.39622e-05	2.56888e-06	ESTIMATED
CM10	WEU0081	Gastric	1.25024	9618.76	9618.76	33.7753	8.88636	4.47063	284.787	3.41454e-05	6e-08	ESTIMATED
CM10	WEU0081	Gastric	1.25024	9788.19	9790.62	81.6998	72.775	35.0603	119.837	3.44491e-05	1.43674e-07	FIRST_PASS
CM10	WEU0081	Gastric	1.25024	9980.84	9966.24	381.957	28.8947	14.6355	26.0926	3.47567e-05	6.66027e-07	FIRST_PASS
CM10	WEU0081	Gastric	1.25024	10079.5	10079.5	249.548	17.1063	9.10843	40.391	3.49536e-05	4.35e-07	ESTIMATED
CM10	WEU0081	Gastric	1.25024	10117.5	10117.5	57.8631	14.7334	7.98187	174.853	3.50196e-05	1e-07	ESTIMATED
CM10	WEU0081	Gastric	1.25024	10232.2	10232.2	21.8016	10.969	6.27108	469.333	3.52175e-05	3.75e-08	ESTIMATED
CM10	WEU0081	Gastric	1.25024	10309.1	10309.1	59.8213	11.1466	6.61674	172.332	3.53496e-05	1.025e-07	ESTIMATED
CM10	WEU0081	Gastric	1.25024	10447.6	10445.1	72.9363	19.6621	12.5151	143.209	3.55819e-05	1.24231e-07	FIRST_PASS
CM10	WEU0081	Gastric	1.25024	10570.1	10560.8	50.1734	17.9125	12.1438	210.487	3.57785e-05	8.5e-08	FIRST_PASS
CM10	WEU0081	Gastric	1.25024	10681.8	10681.8	176.907	9.63392	7.00572	60.3811	3.59829e-05	2.9875e-07	ESTIMATED
CM10	WEU0081	Gastric	1.25024	10806	10806	60.4642	8.48644	6.66493	178.717	3.61913e-05	1.0125e-07	ESTIMATED
CM10	WEU0081	Gastric	1.25024	10869.9	10869.9	54.7178	6.62475	5.42541	198.654	3.62983e-05	9.125e-08	ESTIMATED
CM10	WEU0081	Gastric	1.25024	10982.1	10982.1	37.6536	4.19934	3.71701	291.661	3.64851e-05	6.25e-08	ESTIMATED
CM10	WEU0081	Gastric	1.25024	11090.1	11090.1	87.2902	4.35523	4.17853	127.049	3.66641e-05	1.44291e-07	ESTIMATED
CM10	WEU0081	Gastric	1.25024	11782.6	11801.5	89.2582	2.3926	5.01931	132.217	3.78217e-05	1.43007e-07	FIRST_PASS
CM10	WEU0081	Gastric	1.25024	11984.7	11984.7	326.206	0.884799	2.25794	36.7396	3.81141e-05	5.20956e-07	ESTIMATED
CM10	WEU0081	Gastric	1.25024	12300	12300	35.4117	0.0852922	0.325123	347.342	3.86123e-05	5.56085e-08	ESTIMATED
CM10	WEU0081	Gastric	1.25024	12731.2	12731.2	28.0305	0.0580606	0.323229	454.192	3.92833e-05	4.32386e-08	ESTIMATED
CM10	WEU0081	Gastric	1.25024	13373.5	13373.5	182.105	0.168674	0.909254	73.4386	4.0262e-05	2.73882e-07	ESTIMATED
CM10	WEU0081	Gastric	1.25024	13803	13803	157.573	0.163007	0.888992	87.5977	4.09035e-05	2.32846e-07	ESTIMATED
CM10	WEU0081	Gastric	1.25024	13913.6	13890.8	110.92	0.574321	3.13962	125.233	4.10334e-05	1.63967e-07	FIRST_PASS
CM10	WEU0081	Gastric	1.25024	14136.2	14136.2	19.798	0.125496	0.690605	714.019	4.13942e-05	2.89867e-08	ESTIMATED
CM10	WEU0081	Gastric	1.25024	14724.3	14716.3	310.059	2.47546	13.8367	47.463	4.2235e-05	4.43482e-07	FIRST_PASS
CM10	WEU0081	Gastric	1.25024	15152.9	15152.9	1445.54	1.02146	5.77666	10.4826	4.28569e-05	2.0442e-06	ESTIMATED
CM10	WEU0081	Gastric	1.25024	15310.6	15310.6	327.86	0.859954	4.88388	46.6985	4.30793e-05	4.6125e-07	ESTIMATED
CM10	WEU0081	Gastric	1.25024	15864.9	15864.9	84.6353	0.229887	1.32505	187.45	4.38522e-05	1.17027e-07	ESTIMATED
CM10	WEU0081	Gastric	1.25024	16033.6	16033.6	52.7784	-0.0624215	-0.361412	303.791	4.40847e-05	7.25e-08	ESTIMATED
CM10	WEU0081	Gastric	1.25024	16672.7	16672.7	170.289	3.7451	23.0939	97.9082	4.49548e-05	2.29576e-07	ESTIMATED
CM10	WEU0081	Gastric	1.25024	16824.4	16831.8	106.731	15.7614	98.8765	157.704	4.51688e-05	1.43208e-07	FIRST_PASS
CM10	WEU0081	Gastric	1.25024	16960.1	16973.1	106.555	32.4355	206.643	159.29	4.53579e-05	1.42358e-07	FIRST_PASS
CM10	WEU0081	Gastric	1.25024	17122.2	17122.2	941.938	11.7084	75.8327	18.1776	4.55567e-05	1.24948e-06	ESTIMATED
CM10	WEU0081	Gastric	1.25024	17164.7	17154	87.4955	11.6977	76.0324	196.055	4.5599e-05	1.1625e-07	FIRST_PASS
CM10	WEU0081	Gastric	1.25024	17320.2	17326.8	79.4184	7.87588	52.195	218.172	4.58282e-05	1.05e-07	FIRST_PASS
CM10	WEU0081	Gastric	1.25024	17500.5	17498	81.698	8.56178	57.858	214.179	4.60539e-05	1.075e-07	FIRST_PASS
CM10	WEU0081	Gastric	1.25024	17650.4	17631	168.107	6.7696	46.455	104.879	4.62287e-05	2.2e-07	FIRST_PASS
CM10	WEU0081	Gastric	1.25024	18111.6	18111.6	23.1906	3.62923	26.3667	780.988	4.68545e-05	3e-08	ESTIMATED
CM10	WEU0081	Gastric	1.25024	18178.6	18178.6	70.6946	3.67252	26.8996	257.143	4.69411e-05	9.125e-08	ESTIMATED
CM10	WEU0081	Gastric	1.25024	18269.1	18269.1	240.509	2.99318	22.1683	75.96	4.70578e-05	3.0875e-07	ESTIMATED
CM10	WEU0081	Gastric	1.25024	18751.1	18751.1	199.146	2.06271	16.2343	94.1576	4.76745e-05	2.525e-07	ESTIMATED
CM10	WEU0081	Gastric	1.25024	19150.3	19150.3	1824.47	1.05558	8.75683	10.4963	4.81793e-05	2.29506e-06	ESTIMATED
CM10	WEU0081	Gastric	1.25024	20592.5	20592.5	106.12	0.297955	3.05442	194.05	4.99606e-05	1.28731e-07	ESTIMATED
CM10	WEU0081	Gastric	1.25024	20980.4	20980.4	85.5196	0.0906486	0.990673	245.329	5.0429e-05	1.02754e-07	ESTIMATED
CM10	WEU0081	Gastric	1.25024	21216.4	21216.4	179.128	0.0506436	0.576466	118.443	5.07117e-05	2.14077e-07	ESTIMATED
CM10	WEU0081	Gastric	1.25024	21364.9	21364.9	80.304	0.149923	1.75217	266.05	5.08889e-05	9.56376e-08	ESTIMATED
CM10	WEU0081	Gastric	1.25024	22355.1	22355.1	48.4902	0.00466538	0.0496858	461.023	5.20549e-05	5.64258e-08	ESTIMATED
CM10	WEU0081	Gastric	1.25024	23650.4	23650.4	310.772	0.0727355	1.04365	76.1019	5.35417e-05	3.52774e-07	ESTIMATED
CM10	WEU0084	Gastric	0.411607	1507.55	1509.18	53.7989	6.89869	5.53659	28.0522	1.35252e-05	2.41071e-07	SECOND_PASS
CM10	WEU0084	Gastric	0.411607	1733.86	1733.86	93.4551	3.57232	2.48213	18.5529	1.44971e-05	3.90696e-07	ESTIMATED
CM10	WEU0084	Gastric	0.411607	1754.42	1753	30.5311	4.31505	2.96552	57.4167	1.45768e-05	1.26618e-07	FIRST_PASS
CM10	WEU0084	Gastric	0.411607	1954.32	1954.32	11.3068	1.82002	1.29712	172.845	1.53912e-05	4.45402e-08	ESTIMATED
CM10	WEU0084	Gastric	0.411607	1977.43	1977.43	59.5353	1.83409	1.32208	33.2145	1.54819e-05	2.31761e-07	ESTIMATED
CM10	WEU0084	Gastric	0.411607	1996.56	2003.78	16.696	4.43077	3.23576	120.016	1.55847e-05	6.4961e-08	FIRST_PASS
CM10	WEU0084	Gastric	0.411607	2203.66	2203.66	8.86105	0.272566	0.217332	248.69	1.63435e-05	3.28721e-08	ESTIMATED
CM10	WEU0084	Gastric	0.411607	2222.28	2222.28	18.1602	0.910576	0.730067	122.371	1.64124e-05	6.706e-08	ESTIMATED
CM10	WEU0084	Gastric	0.411607	2240.07	2240.07	41.741	0.599675	0.48334	53.6659	1.6478e-05	1.53524e-07	ESTIMATED
CM10	WEU0084	Gastric	0.411607	2385.78	2385.78	1.11949	0.600627	0.505623	2131.12	1.70055e-05	3.9897e-09	ESTIMATED
CM10	WEU0084	Gastric	0.411607	2447.38	2447.38	16.6756	0.313888	0.269186	146.764	1.72236e-05	5.875e-08	ESTIMATED
CM10	WEU0084	Gastric	0.411607	2544.27	2544.27	48.2961	0.325035	0.287065	52.6807	1.75612e-05	1.66436e-07	ESTIMATED
CM10	WEU0084	Gastric	0.411607	2578.52	2578.52	3.60507	0.954862	0.852189	715.248	1.7679e-05	1.23564e-08	ESTIMATED
CM10	WEU0084	Gastric	0.411607	2802.49	2802.49	7.38904	0.511397	0.486664	379.277	1.84308e-05	2.43116e-08	ESTIMATED
CM10	WEU0084	Gastric	0.411607	2954.6	2954.6	37.4047	0.634396	0.618588	78.99	1.89244e-05	1.20122e-07	ESTIMATED
CM10	WEU0084	Gastric	0.411607	3005.81	3005.81	1.56363	0.43461	0.427264	1922.32	1.90877e-05	4.96434e-09	ESTIMATED
CM10	WEU0084	Gastric	0.411607	3031.71	3031.71	4.85863	0.191165	0.188713	623.984	1.91698e-05	1.53613e-08	ESTIMATED
CM10	WEU0084	Gastric	0.411607	3101.32	3101.32	122.292	0.147293	0.147029	25.3599	1.93886e-05	3.7875e-07	ESTIMATED
CM10	WEU0084	Gastric	0.411607	3360.52	3360.52	4.57597	0.925798	0.896878	734.383	2.01825e-05	1.37412e-08	ESTIMATED
CM10	WEU0084	Gastric	0.411607	3380.96	3380.96	22.8818	0.897261	0.866465	147.757	2.02438e-05	6.85036e-08	ESTIMATED
CM10	WEU0084	Gastric	0.411607	3454.61	3459.92	20.8424	4.31847	4.11994	166.004	2.04789e-05	6.16973e-08	FIRST_PASS
CM10	WEU0084	Gastric	0.411607	3484.03	3501.38	21.656	4.00098	3.79324	161.682	2.06012e-05	6.36992e-08	FIRST_PASS
CM10	WEU0084	Gastric	0.411607	3590.56	3591.64	22.7866	3.99703	3.73917	157.621	2.0865e-05	6.61741e-08	FIRST_PASS
CM10	WEU0084	Gastric	0.411607	3722.3	3722.3	89.5692	0.968145	0.888863	41.5578	2.12412e-05	2.55832e-07	ESTIMATED
CM10	WEU0084	Gastric	0.411607	3905.3	3905.3	74.0472	3.13205	2.80569	52.7406	2.1757e-05	2.05568e-07	ESTIMATED
CM10	WEU0084	Gastric	0.411607	3933.25	3942.85	31.5294	5.26623	4.69459	125.053	2.18614e-05	8.74057e-08	FIRST_PASS
CM10	WEU0084	Gastric	0.411607	4037.3	4037.3	2.27175	0.318376	0.280421	1777.18	2.21217e-05	6.2232e-09	ESTIMATED
CM10	WEU0084	Gastric	0.411607	4065.01	4070.53	40.1105	4.87699	4.27773	101.483	2.22125e-05	1.09336e-07	FIRST_PASS
CM10	WEU0084	Gastric	0.411607	4146.61	4151.36	29.9681	6.25765	5.43415	138.526	2.2432e-05	8.09504e-08	FIRST_PASS
CM10	WEU0084	Gastric	0.411607	4211.79	4211.79	121.924	2.14475	1.84887	34.5444	2.25947e-05	3.2783e-07	ESTIMATED
CM10	WEU0084	Gastric	0.411607	4376.6	4370.21	29.1358	6.67729	5.64914	149.994	2.30157e-05	7.67082e-08	FIRST_PASS
CM10	WEU0084	Gastric	0.411607	4489.19	4489.19	176.657	1.99002	1.66078	25.4118	2.33269e-05	4.62997e-07	ESTIMATED
CM10	WEU0084	Gastric	0.411607	4555.41	4555.41	15.6017	0.888871	0.738669	291.983	2.34983e-05	4.02392e-08	ESTIMATED
CM10	WEU0084	Gastric	0.411607	4585.09	4585.09	58.967	1.98723	1.65126	77.7569	2.35747e-05	1.51453e-07	ESTIMATED
CM10	WEU0084	Gastric	0.411607	4645.37	4645.37	7.48003	0.877407	0.728922	621.036	2.37292e-05	1.91045e-08	ESTIMATED
CM10	WEU0084	Gastric	0.411607	4698.93	4698.93	11.4393	0.507809	0.421797	410.77	2.38656e-05	2.9045e-08	ESTIMATED
CM10	WEU0084	Gastric	0.411607	4767.2	4767.2	32.6232	0.231026	0.191851	146.129	2.40384e-05	8.22649e-08	ESTIMATED
CM10	WEU0084	Gastric	0.411607	4908.07	4908.07	25.697	0.146862	0.121903	190.998	2.43909e-05	6.39122e-08	ESTIMATED
CM10	WEU0084	Gastric	0.411607	4976.17	4976.17	5.06545	-0.393245	-0.326341	982.373	2.45596e-05	1.25e-08	ESTIMATED
CM10	WEU0084	Gastric	0.411607	5084.44	5084.44	139.104	3.51316	2.91445	36.5514	2.48253e-05	3.39595e-07	ESTIMATED
CM10	WEU0084	Gastric	0.411607	5303.71	5303.71	377.654	4.8989	4.03523	14.0438	2.53549e-05	9.02709e-07	ESTIMATED
CM10	WEU0084	Gastric	0.411607	5402.2	5402.2	1.5834	3.41828	2.76704	3411.78	2.55893e-05	3.75e-09	ESTIMATED
CM10	WEU0084	Gastric	0.411607	5524.52	5539.46	20.8458	11.7186	9.26562	265.735	2.59124e-05	4.875e-08	FIRST_PASS
CM10	WEU0084	Gastric	0.411607	5619.57	5619.57	399.314	6.86076	5.35274	14.0731	2.6099e-05	9.2727e-07	ESTIMATED
CM10	WEU0084	Gastric	0.411607	5709.09	5704.94	66.2936	18.6266	14.3315	86.0557	2.62965e-05	1.52589e-07	FIRST_PASS
CM10	WEU0084	Gastric	0.411607	5818.95	5818.95	101.652	6.24302	4.71712	57.2439	2.6558e-05	2.325e-07	ESTIMATED
CM10	WEU0084	Gastric	0.411607	5885.74	5885.74	363.562	5.96636	4.46147	16.1891	2.671e-05	8.24937e-07	ESTIMATED
CM10	WEU0084	Gastric	0.411607	6201.92	6201.92	81.3476	3.49095	2.49047	76.2397	2.7418e-05	1.80031e-07	ESTIMATED
CM10	WEU0084	Gastric	0.411607	6358.11	6358.11	24.6007	1.22393	0.862896	258.452	2.77611e-05	5.375e-08	ESTIMATED
CM10	WEU0084	Gastric	0.411607	6448.74	6448.74	194.595	2.14394	1.5503	33.1393	2.79583e-05	4.2183e-07	ESTIMATED
CM10	WEU0084	Gastric	0.411607	6699.18	6699.18	154.807	-0.0364415	-0.0283338	43.2745	2.8496e-05	3.275e-07	ESTIMATED
CM10	WEU0084	Gastric	0.411607	7098.61	7098.61	50.1275	-0.283435	-0.198819	141.611	2.93332e-05	1.0375e-07	ESTIMATED
CM10	WEU0084	Gastric	0.411607	7273.9	7273.9	60.3374	4.68825	3.1071	120.554	2.96932e-05	1.23153e-07	ESTIMATED
CM10	WEU0084	Gastric	0.411607	7327.57	7327.57	100.333	10.8679	7.08385	73.0322	2.98025e-05	2.04037e-07	ESTIMATED
CM10	WEU0084	Gastric	0.411607	7371.7	7356.25	39.869	26.8993	17.3806	184.51	2.98608e-05	8.0919e-08	FIRST_PASS
CM10	WEU0084	Gastric	0.411607	7498.7	7498.7	225.133	7.48233	4.65757	33.3079	3.01485e-05	4.52573e-07	ESTIMATED
CM10	WEU0084	Gastric	0.411607	7686.69	7686.69	98.4138	2.68096	1.59333	78.1058	3.05241e-05	1.95e-07	ESTIMATED
CM10	WEU0084	Gastric	0.411607	8039.87	8039.87	118.2	3.62317	2.05885	68.0192	3.12174e-05	2.3e-07	ESTIMATED
CM10	WEU0084	Gastric	0.411607	8204.63	8204.63	68.1868	3.95562	2.40599	120.326	3.15357e-05	1.3125e-07	ESTIMATED
CM10	WEU0084	Gastric	0.411607	8316.73	8316.73	70.6707	5.18437	3.31059	117.683	3.17504e-05	1.35e-07	ESTIMATED
CM10	WEU0084	Gastric	0.411607	8414.87	8414.87	37.5294	5.2967	3.53568	224.22	3.19372e-05	7.125e-08	ESTIMATED
CM10	WEU0084	Gastric	0.411607	8485.43	8488.64	98.6775	8.94911	6.18344	86.0241	3.20769e-05	1.86441e-07	SECOND_PASS
CM10	WEU0084	Gastric	0.411607	8577.95	8586.43	91.6119	9.34882	6.77318	93.7262	3.22611e-05	1.72103e-07	FIRST_PASS
CM10	WEU0084	Gastric	0.411607	8794.7	8794.7	322.702	9.49236	7.66228	27.2533	3.265e-05	5.9901e-07	ESTIMATED
CM10	WEU0084	Gastric	0.411607	8879.33	8879.33	116.079	8.55056	7.23486	76.4938	3.28067e-05	2.1375e-07	ESTIMATED
CM10	WEU0084	Gastric	0.411607	9114.7	9114.7	697.85	7.02556	6.85575	13.0611	3.32387e-05	1.27243e-06	ESTIMATED
CM10	WEU0084	Gastric	0.411607	9515.82	9515.82	152.16	3.73606	4.58445	62.5384	3.39622e-05	2.71531e-07	ESTIMATED
CM10	WEU0084	Gastric	0.411607	9618.76	9618.76	196.508	1.79343	2.28273	48.9485	3.41454e-05	3.48789e-07	ESTIMATED
CM10	WEU0084	Gastric	0.411607	9788.19	9788.19	78.9914	1.28406	1.70168	123.915	3.44448e-05	1.39079e-07	ESTIMATED
CM10	WEU0084	Gastric	0.411607	9980.84	9980.84	25.023	1.53513	1.04319	398.866	3.47822e-05	4.36013e-08	ESTIMATED
CM10	WEU0084	Gastric	0.411607	10079.5	10079.5	36.0299	2.50462	1.68975	279.754	3.49536e-05	6.25e-08	ESTIMATED
CM10	WEU0084	Gastric	0.411607	10117.5	10117.5	16.611	2.33077	1.58726	609.086	3.50196e-05	2.875e-08	ESTIMATED
CM10	WEU0084	Gastric	0.411607	10232.2	10232.2	51.5085	2.90883	2.03852	198.652	3.52175e-05	8.875e-08	ESTIMATED
CM10	WEU0084	Gastric	0.411607	10309.1	10308.1	150.48	8.69115	6.20968	68.5017	3.53478e-05	2.5742e-07	FIRST_PASS
CM10	WEU0084	Gastric	0.411607	10447.6	10447.6	110.552	3.57013	2.64525	94.5037	3.55862e-05	1.8875e-07	ESTIMATED
CM10	WEU0084	Gastric	0.411607	10570.1	10570.1	67.8419	4.07268	3.11833	155.805	3.57942e-05	1.15e-07	ESTIMATED
CM10	WEU0084	Gastric	0.411607	10681.8	10681.8	46.7055	3.92158	3.09645	228.706	3.59829e-05	7.875e-08	ESTIMATED
CM10	WEU0084	Gastric	0.411607	10806	10825.4	70.2455	15.4909	12.7396	154.108	3.62239e-05	1.17528e-07	SECOND_PASS
CM10	WEU0084	Gastric	0.411607	10869.9	10869.9	1431.1	16.0196	13.3455	7.59548	3.62983e-05	2.3234e-06	ESTIMATED
CM10	WEU0084	Gastric	0.411607	10982.1	10975.5	29.2671	278.786	239.613	375.014	3.64742e-05	4.86307e-08	FIRST_PASS
CM10	WEU0084	Gastric	0.411607	11090.1	11073.3	43.5404	143.201	126.783	254.324	3.66364e-05	7.20313e-08	FIRST_PASS
CM10	WEU0084	Gastric	0.411607	11782.6	11773.4	52.9929	50.4367	56.6427	222.17	3.77768e-05	8.5e-08	FIRST_PASS
CM10	WEU0084	Gastric	0.411607	11984.7	11974.5	266.993	25.0381	30.4191	44.8496	3.8098e-05	4.24731e-07	SECOND_PASS
CM10	WEU0084	Gastric	0.411607	12300	12300	215.152	5.953	8.32246	57.1688	3.86123e-05	3.3625e-07	ESTIMATED
CM10	WEU0084	Gastric	0.411607	12731.2	12731.2	406.701	3.23918	5.63712	31.3037	3.92833e-05	6.27456e-07	ESTIMATED
CM10	WEU0084	Gastric	0.411607	13373.5	13404.4	56.7896	0.611012	1.69856	236.036	4.03085e-05	8.53801e-08	SECOND_PASS
CM10	WEU0084	Gastric	0.411607	13803	13803	144.146	0.0929319	0.356259	95.7573	4.09035e-05	2.14068e-07	ESTIMATED
CM10	WEU0084	Gastric	0.411607	13913.6	13913.6	110.994	-0.0310542	-0.132797	125.354	4.1067e-05	1.6375e-07	ESTIMATED
CM10	WEU0084	Gastric	0.411607	14136.2	14136.2	245.248	0.128357	0.713939	57.6404	4.13942e-05	3.58138e-07	ESTIMATED
CM10	WEU0084	Gastric	0.411607	14724.3	14722.5	40.0143	3.24975	22.1785	367.931	4.22439e-05	5.74085e-08	FIRST_PASS
CM10	WEU0084	Gastric	0.411607	15152.9	15152.9	577.124	0.178131	1.37851	26.2559	4.28569e-05	8.23617e-07	ESTIMATED
CM10	WEU0084	Gastric	0.411607	15310.6	15310.6	108.678	0.0645242	0.539559	140.88	4.30793e-05	1.52742e-07	ESTIMATED
CM10	WEU0084	Gastric	0.411607	15864.9	15831.3	450.898	0.891667	8.31193	35.1105	4.38057e-05	6.22114e-07	FIRST_PASS
CM10	WEU0084	Gastric	0.411607	16033.6	16033.6	714.848	0.579896	5.52495	22.4293	4.40847e-05	9.82747e-07	ESTIMATED
CM10	WEU0084	Gastric	0.411607	16672.7	16672.7	210.822	1.85818	19.0121	79.0842	4.49548e-05	2.84221e-07	ESTIMATED
CM10	WEU0084	Gastric	0.411607	16824.4	16832.3	119.218	6.49903	67.7305	141.189	4.51695e-05	1.59961e-07	FIRST_PASS
CM10	WEU0084	Gastric	0.411607	16960.1	16969.9	98.9907	19.4653	206.146	171.429	4.53537e-05	1.32235e-07	FIRST_PASS
CM10	WEU0084	Gastric	0.411607	17122.2	17119.6	37.575	10.3009	111.04	455.612	4.55533e-05	5e-08	FIRST_PASS
CM10	WEU0084	Gastric	0.411607	17164.7	17165.5	64.9572	10.28	111.422	264.259	4.56143e-05	8.625e-08	FIRST_PASS
CM10	WEU0084	Gastric	0.411607	17320.2	17319.7	93.6225	6.35887	70.2139	184.995	4.58187e-05	1.2375e-07	FIRST_PASS
CM10	WEU0084	Gastric	0.411607	17500.5	17514.1	605.737	3.76746	42.6013	28.9137	4.60751e-05	7.9677e-07	FIRST_PASS
CM10	WEU0084	Gastric	0.411607	17650.4	17650.4	1033.79	2.68076	30.8313	17.0736	4.62541e-05	1.35455e-06	ESTIMATED
CM10	WEU0084	Gastric	0.411607	18111.6	18117.9	218.652	2.24526	27.4155	82.8619	4.68627e-05	2.82776e-07	FIRST_PASS
CM10	WEU0084	Gastric	0.411607	18178.6	18178.6	46.4996	1.28884	15.8633	390.941	4.69411e-05	6e-08	ESTIMATED
CM10	WEU0084	Gastric	0.411607	18269.1	18269.1	466.545	0.943935	11.7584	39.1583	4.70578e-05	6.00866e-07	ESTIMATED
CM10	WEU0084	Gastric	0.411607	18751.1	18751.1	518.998	0.328031	4.36456	36.1294	4.76745e-05	6.59774e-07	ESTIMATED
CM10	WEU0084	Gastric	0.411607	19150.3	19150.3	663.263	0.0882323	1.24328	28.8728	4.81793e-05	8.34337e-07	ESTIMATED
CM10	WEU0084	Gastric	0.411607	20592.5	20598.7	152.908	0.23139	3.86575	134.713	4.99681e-05	1.85405e-07	SECOND_PASS
CM10	WEU0084	Gastric	0.411607	20980.4	20980.4	39.5901	0.0321102	0.555134	529.941	5.0429e-05	4.75611e-08	ESTIMATED
CM10	WEU0084	Gastric	0.411607	21216.4	21216.4	143.547	0.0342491	0.704179	147.801	5.07117e-05	1.71323e-07	ESTIMATED
CM10	WEU0084	Gastric	0.411607	21364.9	21364.9	33.2409	0.0556195	1.24779	642.73	5.08889e-05	3.95808e-08	ESTIMATED
CM10	WEU0084	Gastric	0.411607	22355.1	22377.1	160.752	3.78144	73.7138	139.202	5.20805e-05	1.87067e-07	FIRST_PASS
CM10	WEU0084	Gastric	0.411607	23650.4	23650.4	2491.13	1.81685	34.2704	9.49383	5.35417e-05	2.85175e-06	ESTIMATED
CM10	WEU0092	Gastric	0.758471	1507.55	1507.55	63.4787	15.4816	5.43975	23.7488	1.35179e-05	2.84601e-07	ESTIMATED
CM10	WEU0092	Gastric	0.758471	1733.86	1733.86	71.5355	12.2617	4.84141	24.2378	1.44971e-05	2.98019e-07	ESTIMATED
CM10	WEU0092	Gastric	0.758471	1754.42	1753.89	53.554	16.0056	6.38707	32.75	1.45806e-05	2.22756e-07	FIRST_PASS
CM10	WEU0092	Gastric	0.758471	1954.32	1953.85	74.4638	9.68527	4.00184	26.2389	1.53893e-05	2.9115e-07	FIRST_PASS
CM10	WEU0092	Gastric	0.758471	1977.43	1977.43	80.1529	6.40543	2.65429	24.6707	1.54819e-05	3.1377e-07	ESTIMATED
CM10	WEU0092	Gastric	0.758471	1996.56	1996.56	58.2969	8.1284	3.37612	34.2481	1.55566e-05	2.27116e-07	ESTIMATED
CM10	WEU0092	Gastric	0.758471	2203.66	2203.66	44.1296	3.00811	1.30237	49.936	1.63435e-05	1.63644e-07	ESTIMATED
CM10	WEU0092	Gastric	0.758471	2222.28	2228.4	35.219	6.26942	2.7444	63.2727	1.6435e-05	1.2986e-07	FIRST_PASS
CM10	WEU0092	Gastric	0.758471	2240.07	2240.07	43.0022	4.99503	2.19797	52.0919	1.6478e-05	1.58671e-07	ESTIMATED
CM10	WEU0092	Gastric	0.758471	2385.78	2384.99	12.8023	12.2773	5.77046	186.294	1.70026e-05	4.56339e-08	FIRST_PASS
CM10	WEU0092	Gastric	0.758471	2447.38	2447.38	21.4959	2.7483	1.32989	113.853	1.72236e-05	7.57453e-08	ESTIMATED
CM10	WEU0092	Gastric	0.758471	2544.27	2543.32	12.8931	10.5841	5.36118	197.262	1.75579e-05	4.44908e-08	FIRST_PASS
CM10	WEU0092	Gastric	0.758471	2578.52	2578.52	3.37498	1.31398	0.677046	764.009	1.7679e-05	1.15707e-08	ESTIMATED
CM10	WEU0092	Gastric	0.758471	2802.49	2802.49	29.654	0.278986	0.160158	94.5065	1.84308e-05	9.75e-08	ESTIMATED
CM10	WEU0092	Gastric	0.758471	2954.6	2950.21	5.82155	2.12828	1.30711	506.774	1.89103e-05	1.8652e-08	SECOND_PASS
CM10	WEU0092	Gastric	0.758471	3005.81	3005.81	24.6448	0.171206	0.107936	121.965	1.90877e-05	7.82747e-08	ESTIMATED
CM10	WEU0092	Gastric	0.758471	3031.71	3031.71	4.606	0.102642	0.0655139	658.207	1.91698e-05	1.45674e-08	ESTIMATED
CM10	WEU0092	Gastric	0.758471	3101.32	3101.32	1.25712	0.544896	0.359708	2467	1.93886e-05	3.92946e-09	ESTIMATED
CM10	WEU0092	Gastric	0.758471	3360.52	3359.3	38.5003	4.58216	2.87567	87.2537	2.01789e-05	1.15444e-07	FIRST_PASS
CM10	WEU0092	Gastric	0.758471	3380.96	3380.96	39.4345	3.87594	2.41602	85.7359	2.02438e-05	1.18246e-07	ESTIMATED
CM10	WEU0092	Gastric	0.758471	3454.61	3455.18	16.6311	4.24161	2.58455	207.754	2.04649e-05	4.92468e-08	SECOND_PASS
CM10	WEU0092	Gastric	0.758471	3484.03	3484.03	25.9657	1.50899	0.911572	134.178	2.05501e-05	7.64445e-08	ESTIMATED
CM10	WEU0092	Gastric	0.758471	3590.56	3586.88	23.5207	9.92067	5.81647	152.499	2.08512e-05	6.8342e-08	FIRST_PASS
CM10	WEU0092	Gastric	0.758471	3722.3	3722.3	38.6016	-0.175078	-0.0988759	96.4287	2.12412e-05	1.1e-07	ESTIMATED
CM10	WEU0092	Gastric	0.758471	3905.3	3902.98	23.5301	80.8394	23.9167	165.872	2.17506e-05	6.55581e-08	FIRST_PASS
CM10	WEU0092	Gastric	0.758471	3933.25	3933.25	65.3216	10.2589	2.79576	60.2137	2.18348e-05	1.81717e-07	ESTIMATED
CM10	WEU0092	Gastric	0.758471	4037.3	4037.3	30.6946	3.62528	0.778682	131.531	2.21217e-05	8.41377e-08	ESTIMATED
CM10	WEU0092	Gastric	0.758471	4065.01	4065.01	7.63966	1.9283	0.392236	532.093	2.21975e-05	2.0851e-08	ESTIMATED
CM10	WEU0092	Gastric	0.758471	4146.61	4146.61	27.4163	3.60781	0.635386	151.246	2.24192e-05	7.41022e-08	ESTIMATED
CM10	WEU0092	Gastric	0.758471	4211.79	4211.79	29.4736	2.8514	0.453935	142.9	2.25947e-05	7.90922e-08	ESTIMATED
CM10	WEU0092	Gastric	0.758471	4376.6	4378.96	22.2886	42.4615	5.75661	196.467	2.30387e-05	5.8632e-08	FIRST_PASS
CM10	WEU0092	Gastric	0.758471	4489.19	4489.19	22.1823	7.34364	1.02805	202.377	2.33269e-05	5.76076e-08	ESTIMATED
CM10	WEU0092	Gastric	0.758471	4555.41	4555.41	27.3832	10.8209	1.54479	166.358	2.34983e-05	7.06625e-08	ESTIMATED
CM10	WEU0092	Gastric	0.758471	4585.09	4585.09	21.888	4.62142	0.665621	209.48	2.35747e-05	5.625e-08	ESTIMATED
CM10	WEU0092	Gastric	0.758471	4645.37	4650.53	23.7453	73.3029	10.7678	195.851	2.37424e-05	6.06144e-08	FIRST_PASS
CM10	WEU0092	Gastric	0.758471	4698.93	4698.93	747.472	5.80583	0.865511	6.28643	2.38656e-05	1.84379e-06	ESTIMATED
CM10	WEU0092	Gastric	0.758471	4767.2	4764.55	23.0345	336.543	51.1945	206.844	2.40317e-05	5.80912e-08	FIRST_PASS
CM10	WEU0092	Gastric	0.758471	4908.07	4911.57	29.8376	22.4057	3.56979	164.61	2.43996e-05	7.41035e-08	SECOND_PASS
CM10	WEU0092	Gastric	0.758471	4976.17	4969.13	46.0333	38.2451	6.20731	107.946	2.45422e-05	1.13673e-07	FIRST_PASS
CM10	WEU0092	Gastric	0.758471	5084.44	5083.32	24.3901	246.063	43.2913	208.417	2.48226e-05	5.9549e-08	FIRST_PASS
CM10	WEU0092	Gastric	0.758471	5303.71	5291.95	41.4057	23.5273	5.16351	127.807	2.53268e-05	9.90635e-08	FIRST_PASS
CM10	WEU0092	Gastric	0.758471	5402.2	5402.2	62.9738	2.75768	0.694701	85.7849	2.55893e-05	1.4875e-07	ESTIMATED
CM10	WEU0092	Gastric	0.758471	5524.52	5524.52	34.2104	2.23839	0.673103	161.487	2.58774e-05	8.01223e-08	ESTIMATED
CM10	WEU0092	Gastric	0.758471	5619.57	5619.57	2.85591	0.727313	0.257012	1967.7	2.6099e-05	6.63188e-09	ESTIMATED
CM10	WEU0092	Gastric	0.758471	5709.09	5709.09	52.2022	0.613528	0.259208	109.365	2.63061e-05	1.20161e-07	ESTIMATED
CM10	WEU0092	Gastric	0.758471	5818.95	5818.95	137.765	0.39569	0.219375	42.2384	2.6558e-05	3.12657e-07	ESTIMATED
CM10	WEU0092	Gastric	0.758471	5885.74	5883.27	28.6435	5.53386	3.74804	205.396	2.67044e-05	6.50039e-08	FIRST_PASS
CM10	WEU0092	Gastric	0.758471	6201.92	6199.44	37.7976	9.06067	9.75006	164.016	2.74125e-05	8.35571e-08	FIRST_PASS
CM10	WEU0092	Gastric	0.758471	6358.11	6354.78	39.2775	5.96517	6.66953	161.792	2.77538e-05	8.57522e-08	FIRST_PASS
CM10	WEU0092	Gastric	0.758471	6448.74	6448.74	137.597	2.62668	3.00711	46.8669	2.79583e-05	2.99433e-07	ESTIMATED
CM10	WEU0092	Gastric	0.758471	6699.18	6690.8	70.3691	3.27628	3.99388	95.0816	2.84782e-05	1.49882e-07	FIRST_PASS
CM10	WEU0092	Gastric	0.758471	7098.61	7098.61	225.632	0.372891	0.478905	31.461	2.93332e-05	4.69602e-07	ESTIMATED
CM10	WEU0092	Gastric	0.758471	7273.9	7273.9	4.38129	0.754637	0.970252	1660.22	2.96932e-05	8.94255e-09	ESTIMATED
CM10	WEU0092	Gastric	0.758471	7327.57	7323.76	27.2632	16.3508	21.0291	268.632	2.97948e-05	5.54534e-08	FIRST_PASS
CM10	WEU0092	Gastric	0.758471	7371.7	7371.7	104.138	2.45762	3.16173	70.788	2.98921e-05	2.11606e-07	ESTIMATED
CM10	WEU0092	Gastric	0.758471	7498.7	7485.5	38.7161	3.21743	4.14215	193.343	3.0122e-05	7.78952e-08	FIRST_PASS
CM10	WEU0092	Gastric	0.758471	7686.69	7680.5	39.3004	5.92817	6.0838	195.431	3.05118e-05	7.80555e-08	FIRST_PASS
CM10	WEU0092	Gastric	0.758471	8039.87	8032.98	33.367	7.01041	5.06897	240.746	3.12041e-05	6.48006e-08	FIRST_PASS
CM10	WEU0092	Gastric	0.758471	8204.63	8204.63	56.1974	1.3499	0.92547	145.997	3.15357e-05	1.07941e-07	ESTIMATED
CM10	WEU0092	Gastric	0.758471	8316.73	8316.73	31.7369	1.24555	0.879339	262.052	3.17504e-05	6.05802e-08	ESTIMATED
CM10	WEU0092	Gastric	0.758471	8414.87	8414	45.2961	12.7147	9.21275	185.756	3.19355e-05	8.59407e-08	FIRST_PASS
CM10	WEU0092	Gastric	0.758471	8485.43	8486.99	53.1083	16.7738	12.3976	159.805	3.20738e-05	1.00314e-07	FIRST_PASS
CM10	WEU0092	Gastric	0.758471	8577.95	8577.95	232.912	9.39201	7.1188	36.8291	3.22452e-05	4.39592e-07	ESTIMATED
CM10	WEU0092	Gastric	0.758471	8794.7	8794.7	20.8832	2.17971	1.75805	421.138	3.265e-05	3.875e-08	ESTIMATED
CM10	WEU0092	Gastric	0.758471	8879.33	8879.33	56.7598	2.87158	2.37502	156.437	3.28067e-05	1.04856e-07	ESTIMATED
CM10	WEU0092	Gastric	0.758471	9114.7	9102.91	72.8116	11.9235	10.5659	125.02	3.32172e-05	1.3276e-07	FIRST_PASS
CM10	WEU0092	Gastric	0.758471	9515.82	9515.82	158.062	3.5307	3.59459	60.203	3.39622e-05	2.82064e-07	ESTIMATED
CM10	WEU0092	Gastric	0.758471	9618.76	9595.66	106.583	8.5342	8.94276	90.0302	3.41044e-05	1.89171e-07	FIRST_PASS
CM10	WEU0092	Gastric	0.758471	9788.19	9777.42	67.3495	29.5642	33.1735	145.174	3.44259e-05	1.18497e-07	FIRST_PASS
CM10	WEU0092	Gastric	0.758471	9980.84	9980.84	545.751	8.66108	9.29134	18.2883	3.47822e-05	9.50942e-07	ESTIMATED
CM10	WEU0092	Gastric	0.758471	10079.5	10079.5	2.16268	5.86456	6.05223	4660.64	3.49536e-05	3.75e-09	ESTIMATED
CM10	WEU0092	Gastric	0.758471	10117.5	10113.4	28.8791	11.0049	11.2111	350.199	3.50124e-05	5e-08	SECOND_PASS
CM10	WEU0092	Gastric	0.758471	10232.2	10231.5	28.6206	110.739	107.997	357.488	3.52162e-05	4.92538e-08	FIRST_PASS
CM10	WEU0092	Gastric	0.758471	10309.1	10333.1	83.623	23.0572	21.6941	123.567	3.53906e-05	1.43204e-07	FIRST_PASS
CM10	WEU0092	Gastric	0.758471	10447.6	10448.5	73.6592	27.4076	24.7994	141.85	3.55878e-05	1.25453e-07	FIRST_PASS
CM10	WEU0092	Gastric	0.758471	10570.1	10555.7	224.941	18.3623	16.0471	46.9266	3.57698e-05	3.81125e-07	FIRST_PASS
CM10	WEU0092	Gastric	0.758471	10681.8	10681.8	362.297	7.87723	6.61937	29.4836	3.59829e-05	6.1375e-07	ESTIMATED
CM10	WEU0092	Gastric	0.758471	10806	10806	283.241	5.73312	4.64299	38.1512	3.61913e-05	4.74315e-07	ESTIMATED
CM10	WEU0092	Gastric	0.758471	10869.9	10864.5	62.0752	10.4645	8.33276	175.022	3.62893e-05	1.0368e-07	FIRST_PASS
CM10	WEU0092	Gastric	0.758471	10982.1	10982.1	20.3263	2.61661	2.01607	540.289	3.64851e-05	3.375e-08	ESTIMATED
CM10	WEU0092	Gastric	0.758471	11090.1	11090.1	96.7757	2.46938	1.84789	114.596	3.66641e-05	1.59971e-07	ESTIMATED
CM10	WEU0092	Gastric	0.758471	11782.6	11758.3	40.1355	43.9048	49.3087	292.964	3.77524e-05	6.44251e-08	FIRST_PASS
CM10	WEU0092	Gastric	0.758471	11984.7	11972.1	81.6549	9.03556	13.221	146.619	3.80942e-05	1.29909e-07	FIRST_PASS
CM10	WEU0092	Gastric	0.758471	12300	12300	824.255	1.97716	3.5362	14.9225	3.86123e-05	1.30938e-06	ESTIMATED
CM10	WEU0092	Gastric	0.758471	12731.2	12720.3	54.59	1.4956	3.71883	233.015	3.92664e-05	8.42323e-08	FIRST_PASS
CM10	WEU0092	Gastric	0.758471	13373.5	13387.1	68.4531	9.87816	25.9939	195.566	4.02825e-05	1.02976e-07	FIRST_PASS
CM10	WEU0092	Gastric	0.758471	13803	13803	722.576	1.04592	2.71645	19.1025	4.09035e-05	1.06047e-06	ESTIMATED
CM10	WEU0092	Gastric	0.758471	13913.6	13911	100.93	2.64962	6.85857	137.828	4.10631e-05	1.48892e-07	FIRST_PASS
CM10	WEU0092	Gastric	0.758471	14136.2	14145.1	67.9257	2.50663	6.4421	208.243	4.14072e-05	9.94113e-08	FIRST_PASS
CM10	WEU0092	Gastric	0.758471	14724.3	14719	48.4897	4.65503	13.2467	303.549	4.22389e-05	6.95776e-08	FIRST_PASS
CM10	WEU0092	Gastric	0.758471	15152.9	15152.9	1445.44	1.0087	3.55257	10.4832	4.28569e-05	2.04407e-06	ESTIMATED
CM10	WEU0092	Gastric	0.758471	15310.6	15310.6	583.021	0.850157	3.27422	26.2608	4.30793e-05	8.20222e-07	ESTIMATED
CM10	WEU0092	Gastric	0.758471	15864.9	15864.9	42.1005	0.289033	1.64911	376.834	4.38522e-05	5.81851e-08	ESTIMATED
CM10	WEU0092	Gastric	0.758471	16033.6	16033.6	33.6456	0.267627	1.59331	476.543	4.40847e-05	4.625e-08	ESTIMATED
CM10	WEU0092	Gastric	0.758471	16672.7	16692.6	150.445	10.8562	68.323	110.955	4.49816e-05	2.02702e-07	FIRST_PASS
CM10	WEU0092	Gastric	0.758471	16824.4	16821.2	89.1952	46.3664	294.959	188.588	4.51545e-05	1.1968e-07	FIRST_PASS
CM10	WEU0092	Gastric	0.758471	16960.1	16967	94.6922	62.5238	402.663	179.181	4.53498e-05	1.26515e-07	FIRST_PASS
CM10	WEU0092	Gastric	0.758471	17122.2	17117.1	29.1191	25.3851	165.581	587.829	4.55499e-05	3.875e-08	FIRST_PASS
CM10	WEU0092	Gastric	0.758471	17164.7	17167.4	176.937	28.0581	183.805	97.0255	4.56168e-05	2.35076e-07	FIRST_PASS
CM10	WEU0092	Gastric	0.758471	17320.2	17322.3	84.1505	16.7524	111.214	205.849	4.58222e-05	1.1125e-07	FIRST_PASS
CM10	WEU0092	Gastric	0.758471	17500.5	17498	79.8111	13.8617	93.4371	219.243	4.6054e-05	1.05e-07	FIRST_PASS
CM10	WEU0092	Gastric	0.758471	17650.4	17636.4	647.21	10.3897	70.8874	27.2499	4.62357e-05	8.48366e-07	FIRST_PASS
CM10	WEU0092	Gastric	0.758471	18111.6	18111.6	3311.93	3.89258	27.7083	5.4686	4.68545e-05	4.28396e-06	ESTIMATED
CM10	WEU0092	Gastric	0.758471	18178.6	18178.6	46.4996	3.7756	27.0394	390.941	4.69411e-05	6e-08	ESTIMATED
CM10	WEU0092	Gastric	0.758471	18269.1	18269.1	240.509	2.83128	20.4446	75.96	4.70578e-05	3.0875e-07	ESTIMATED
CM10	WEU0092	Gastric	0.758471	18751.1	18751.1	1255.36	1.70971	12.911	14.9368	4.76745e-05	1.59587e-06	ESTIMATED
CM10	WEU0092	Gastric	0.758471	19150.3	19132.8	137.45	2.79476	21.8893	139.199	4.81573e-05	1.72981e-07	FIRST_PASS
CM10	WEU0092	Gastric	0.758471	20592.5	20588.5	77.1999	2.04984	18.3046	266.691	4.99557e-05	9.3647e-08	FIRST_PASS
CM10	WEU0092	Gastric	0.758471	20980.4	20974.9	79.654	0.617054	5.66304	263.325	5.04224e-05	9.57416e-08	SECOND_PASS
CM10	WEU0092	Gastric	0.758471	21216.4	21209.3	385.651	0.788406	7.35854	54.9961	5.07032e-05	4.6042e-07	FIRST_PASS
CM10	WEU0092	Gastric	0.758471	21364.9	21364.9	712.873	0.53252	5.02669	29.9701	5.08889e-05	8.50625e-07	ESTIMATED
CM10	WEU0092	Gastric	0.758471	22355.1	22355.1	122.897	0.0333041	0.460474	181.902	5.20549e-05	1.43085e-07	ESTIMATED
CM10	WEU0092	Gastric	0.758471	23650.4	23655.8	1056.26	1.09234	15.2213	22.3958	5.35478e-05	1.18929e-06	FIRST_PASS
CM10	WEU0094	Gastric	1.01457	1507.55	1507.55	61.876	26.4035	6.41694	24.364	1.35179e-05	2.77415e-07	ESTIMATED
CM10	WEU0094	Gastric	1.01457	1733.86	1733.86	68.7205	22.0442	5.07898	25.2306	1.44971e-05	2.86414e-07	ESTIMATED
CM10	WEU0094	Gastric	1.01457	1754.42	1751.93	67.8031	23.7062	5.44015	25.8386	1.45724e-05	2.82585e-07	FIRST_PASS
CM10	WEU0094	Gastric	1.01457	1954.32	1954.32	23.9264	9.59928	2.49741	81.6808	1.53912e-05	9.42153e-08	ESTIMATED
CM10	WEU0094	Gastric	1.01457	1977.43	1979.86	73.0204	14.9548	3.97853	27.1138	1.54914e-05	2.85202e-07	FIRST_PASS
CM10	WEU0094	Gastric	1.01457	1996.56	1996.56	53.157	14.1964	3.83305	37.5596	1.55566e-05	2.07092e-07	ESTIMATED
CM10	WEU0094	Gastric	1.01457	2203.66	2203.66	42.256	9.17101	2.85778	52.1501	1.63435e-05	1.56697e-07	ESTIMATED
CM10	WEU0094	Gastric	1.01457	2222.28	2222.28	82.6121	9.47565	2.9455	26.9002	1.64124e-05	3.05061e-07	ESTIMATED
CM10	WEU0094	Gastric	1.01457	2240.07	2240.83	70.3586	11.1764	3.46579	31.8487	1.64808e-05	2.59611e-07	FIRST_PASS
CM10	WEU0094	Gastric	1.01457	2385.78	2386.87	10.3646	6.72273	2.04645	230.29	1.70093e-05	3.69309e-08	SECOND_PASS
CM10	WEU0094	Gastric	1.01457	2447.38	2446.31	22.5599	11.4722	3.46688	108.437	1.72198e-05	7.93785e-08	FIRST_PASS
CM10	WEU0094	Gastric	1.01457	2544.27	2544.27	15.2816	2.87548	0.858858	166.493	1.75612e-05	5.27149e-08	ESTIMATED
CM10	WEU0094	Gastric	1.01457	2578.52	2578.52	9.03921	2.06449	0.614164	285.259	1.7679e-05	3.09756e-08	ESTIMATED
CM10	WEU0094	Gastric	1.01457	2802.49	2804.02	16.6664	13.1957	3.85787	168.244	1.84359e-05	5.48156e-08	FIRST_PASS
CM10	WEU0094	Gastric	1.01457	2954.6	2949.96	19.1237	5.70558	1.77428	154.256	1.89095e-05	6.12463e-08	SECOND_PASS
CM10	WEU0094	Gastric	1.01457	3005.81	3005.81	5.89903	2.01578	0.642233	509.543	1.90877e-05	1.87354e-08	ESTIMATED
CM10	WEU0094	Gastric	1.01457	3031.71	3031.71	2.40797	3.23833	1.04354	1259.03	1.91698e-05	7.61247e-09	ESTIMATED
CM10	WEU0094	Gastric	1.01457	3101.32	3101.32	14.6671	3.32561	1.10535	211.447	1.93886e-05	4.58341e-08	ESTIMATED
CM10	WEU0094	Gastric	1.01457	3360.52	3360.52	48.4535	8.12168	2.77055	69.3555	2.01825e-05	1.45203e-07	ESTIMATED
CM10	WEU0094	Gastric	1.01457	3380.96	3383.18	42.029	13.5425	4.58566	80.4963	2.02505e-05	1.25957e-07	FIRST_PASS
CM10	WEU0094	Gastric	1.01457	3454.61	3454.61	71.3701	12.8975	4.26869	48.4042	2.04632e-05	2.10617e-07	ESTIMATED
CM10	WEU0094	Gastric	1.01457	3484.03	3471.09	65.3087	15.9399	5.24847	53.1489	2.05119e-05	1.92771e-07	FIRST_PASS
CM10	WEU0094	Gastric	1.01457	3590.56	3586.33	26.5216	21.8056	6.93263	135.223	2.08496e-05	7.70542e-08	FIRST_PASS
CM10	WEU0094	Gastric	1.01457	3722.3	3719.56	24.9916	47.8456	14.6387	148.833	2.12334e-05	7.13296e-08	FIRST_PASS
CM10	WEU0094	Gastric	1.01457	3905.3	3905.3	44.7203	2.66878	0.776627	87.3272	2.1757e-05	1.24572e-07	ESTIMATED
CM10	WEU0094	Gastric	1.01457	3933.25	3933.25	42.3169	5.57444	1.6105	92.9475	2.18348e-05	1.17467e-07	ESTIMATED
CM10	WEU0094	Gastric	1.01457	4037.3	4037.3	41.0178	3.31135	0.924061	98.4279	2.21217e-05	1.12323e-07	ESTIMATED
CM10	WEU0094	Gastric	1.01457	4065.01	4065.01	10.3539	1.66376	0.449406	392.606	2.21975e-05	2.82694e-08	ESTIMATED
CM10	WEU0094	Gastric	1.01457	4146.61	4146.61	31.508	6.35755	1.57009	131.605	2.24192e-05	8.51381e-08	ESTIMATED
CM10	WEU0094	Gastric	1.01457	4211.79	4208.73	28.4638	28.3254	6.57033	147.863	2.25865e-05	7.63677e-08	FIRST_PASS
CM10	WEU0094	Gastric	1.01457	4376.6	4380.31	26.0368	56.6748	11.2793	168.235	2.30423e-05	6.8475e-08	FIRST_PASS
CM10	WEU0094	Gastric	1.01457	4489.19	4489.19	26.6999	9.35373	1.72656	168.135	2.33269e-05	6.93229e-08	ESTIMATED
CM10	WEU0094	Gastric	1.01457	4555.41	4553.95	30.9364	16.3288	3.08224	147.204	2.34946e-05	7.97838e-08	FIRST_PASS
CM10	WEU0094	Gastric	1.01457	4585.09	4585.09	74.9748	5.9162	1.12896	61.155	2.35747e-05	1.9301e-07	ESTIMATED
CM10	WEU0094	Gastric	1.01457	4645.37	4645.37	18.2657	3.66823	0.715054	254.322	2.37292e-05	4.66519e-08	ESTIMATED
CM10	WEU0094	Gastric	1.01457	4698.93	4698.93	25.7145	3.21977	0.639796	182.734	2.38656e-05	6.52562e-08	ESTIMATED
CM10	WEU0094	Gastric	1.01457	4767.2	4767.39	26.6142	131.836	26.8576	179.129	2.40388e-05	6.70998e-08	FIRST_PASS
CM10	WEU0094	Gastric	1.01457	4908.07	4908.07	57.2261	4.56811	0.980903	85.7664	2.43909e-05	1.42207e-07	ESTIMATED
CM10	WEU0094	Gastric	1.01457	4976.17	4989.28	34.6105	26.7565	5.92824	144.155	2.45919e-05	8.52949e-08	FIRST_PASS
CM10	WEU0094	Gastric	1.01457	5084.44	5084.44	30.8298	6.96506	1.60242	164.92	2.48253e-05	7.52159e-08	ESTIMATED
CM10	WEU0094	Gastric	1.01457	5303.71	5305.42	28.3496	90.8113	22.878	187.143	2.53591e-05	6.77524e-08	FIRST_PASS
CM10	WEU0094	Gastric	1.01457	5402.2	5402.2	53.8112	16.8955	4.36188	100.392	2.55893e-05	1.27381e-07	ESTIMATED
CM10	WEU0094	Gastric	1.01457	5524.52	5515.87	35.64	20.469	5.4412	154.766	2.58571e-05	8.35463e-08	FIRST_PASS
CM10	WEU0094	Gastric	1.01457	5619.57	5619.57	42.1265	9.26341	2.53026	133.398	2.6099e-05	9.78144e-08	ESTIMATED
CM10	WEU0094	Gastric	1.01457	5709.09	5724.76	35.4077	108.835	30.5736	161.681	2.63422e-05	8.14594e-08	FIRST_PASS
CM10	WEU0094	Gastric	1.01457	5818.95	5818.95	339.985	8.90389	2.56609	17.1153	2.6558e-05	7.75855e-07	ESTIMATED
CM10	WEU0094	Gastric	1.01457	5885.74	5885.74	224.251	5.91268	1.7357	26.2463	2.671e-05	5.08834e-07	ESTIMATED
CM10	WEU0094	Gastric	1.01457	6201.92	6201.1	50.3553	9.38801	3.01647	123.147	2.74162e-05	1.11289e-07	SECOND_PASS
CM10	WEU0094	Gastric	1.01457	6358.11	6362.47	38.4534	8.65896	3.42449	165.459	2.77706e-05	8.39135e-08	SECOND_PASS
CM10	WEU0094	Gastric	1.01457	6448.74	6448.74	68.8189	5.30527	2.40845	93.7059	2.79583e-05	1.49331e-07	ESTIMATED
CM10	WEU0094	Gastric	1.01457	6699.18	6699.18	81.0078	1.76735	1.20075	82.698	2.8496e-05	1.72639e-07	ESTIMATED
CM10	WEU0094	Gastric	1.01457	7098.61	7099.24	35.5377	5.89077	3.33255	199.766	2.93345e-05	7.34164e-08	FIRST_PASS
CM10	WEU0094	Gastric	1.01457	7273.9	7273.9	167.098	1.12782	0.59542	43.5307	2.96932e-05	3.4106e-07	ESTIMATED
CM10	WEU0094	Gastric	1.01457	7327.57	7328.43	35.5336	13.1474	6.80036	206.239	2.98043e-05	7.22558e-08	FIRST_PASS
CM10	WEU0094	Gastric	1.01457	7371.7	7371.7	109.751	2.56458	1.30557	67.1678	2.98921e-05	2.23144e-07	ESTIMATED
CM10	WEU0094	Gastric	1.01457	7498.7	7498.7	104.334	1.29214	0.682919	71.8722	3.01485e-05	2.09194e-07	ESTIMATED
CM10	WEU0094	Gastric	1.01457	7686.69	7676.85	33.5909	3.8231	2.39884	228.54	3.05046e-05	6.67329e-08	SECOND_PASS
CM10	WEU0094	Gastric	1.01457	8039.87	8038.92	36.3084	11.5765	9.17502	221.406	3.12156e-05	7.04912e-08	FIRST_PASS
CM10	WEU0094	Gastric	1.01457	8204.63	8206.33	77.5703	3.29498	2.57482	105.792	3.1539e-05	1.48835e-07	SECOND_PASS
CM10	WEU0094	Gastric	1.01457	8316.73	8316.73	48.5771	3.03558	2.35056	171.207	3.17504e-05	9.26604e-08	ESTIMATED
CM10	WEU0094	Gastric	1.01457	8414.87	8414.87	312.181	5.98532	4.59773	26.9551	3.19372e-05	5.87571e-07	ESTIMATED
CM10	WEU0094	Gastric	1.01457	8485.43	8491.72	46.3814	20.6626	15.7745	183.085	3.20827e-05	8.75999e-08	FIRST_PASS
CM10	WEU0094	Gastric	1.01457	8577.95	8592.67	58.1606	11.9856	9.07705	147.74	3.22728e-05	1.09221e-07	FIRST_PASS
CM10	WEU0094	Gastric	1.01457	8794.7	8798.67	50.3477	6.73779	5.02155	174.758	3.26574e-05	9.3436e-08	SECOND_PASS
CM10	WEU0094	Gastric	1.01457	8879.33	8874.76	48.4207	11.4551	8.48782	183.284	3.27983e-05	8.94588e-08	FIRST_PASS
CM10	WEU0094	Gastric	1.01457	9114.7	9106.03	69.5489	20.1658	14.6857	130.93	3.32229e-05	1.26821e-07	FIRST_PASS
CM10	WEU0094	Gastric	1.01457	9515.82	9515.82	416.747	3.53746	2.50139	22.8336	3.39622e-05	7.5125e-07	ESTIMATED
CM10	WEU0094	Gastric	1.01457	9618.76	9601.02	100.107	11.5921	8.14842	95.9076	3.41139e-05	1.77605e-07	FIRST_PASS
CM10	WEU0094	Gastric	1.01457	9788.19	9781.6	56.692	46.831	32.5138	172.539	3.44332e-05	9.97437e-08	FIRST_PASS
CM10	WEU0094	Gastric	1.01457	9980.84	9980.84	523.818	10.358	7.58929	19.054	3.47822e-05	9.12725e-07	ESTIMATED
CM10	WEU0094	Gastric	1.01457	10079.5	10079.5	875.914	12.9385	9.89685	11.5074	3.49536e-05	1.51875e-06	ESTIMATED
CM10	WEU0094	Gastric	1.01457	10117.5	10120.6	91.7059	17.218	13.4152	110.359	3.50248e-05	1.58831e-07	FIRST_PASS
CM10	WEU0094	Gastric	1.01457	10232.2	10238.8	38.6792	33.7799	27.8009	264.712	3.52289e-05	6.65388e-08	FIRST_PASS
CM10	WEU0094	Gastric	1.01457	10309.1	10340	82.3341	17.5481	15.1683	125.585	3.54024e-05	1.4095e-07	FIRST_PASS
CM10	WEU0094	Gastric	1.01457	10447.6	10472.4	91.3958	16.3675	15.1394	114.583	3.56284e-05	1.5556e-07	FIRST_PASS
CM10	WEU0094	Gastric	1.01457	10570.1	10553.2	97.1002	9.75971	9.42854	108.684	3.57656e-05	1.6454e-07	FIRST_PASS
CM10	WEU0094	Gastric	1.01457	10681.8	10681.8	56.4146	4.87647	5.06761	189.345	3.59829e-05	9.5e-08	ESTIMATED
CM10	WEU0094	Gastric	1.01457	10806	10806	103.114	3.33297	3.73483	104.796	3.61913e-05	1.725e-07	ESTIMATED
CM10	WEU0094	Gastric	1.01457	10869.9	10870	53.9091	9.90107	11.5595	201.635	3.62983e-05	8.99948e-08	FIRST_PASS
CM10	WEU0094	Gastric	1.01457	10982.1	10986	96.9405	5.25424	6.63622	113.327	3.64916e-05	1.60851e-07	FIRST_PASS
CM10	WEU0094	Gastric	1.01457	11090.1	11090.1	230.67	3.39424	4.62488	48.0779	3.66641e-05	3.81299e-07	ESTIMATED
CM10	WEU0094	Gastric	1.01457	11782.6	11765.9	53.45	11.5209	20.0305	220.128	3.77646e-05	8.577e-08	FIRST_PASS
CM10	WEU0094	Gastric	1.01457	11984.7	11984.7	327.627	2.91882	4.57965	36.5802	3.81141e-05	5.23644e-07	ESTIMATED
CM10	WEU0094	Gastric	1.01457	12300	12316.8	125.487	2.34475	4.1489	98.1518	3.86386e-05	1.9673e-07	FIRST_PASS
CM10	WEU0094	Gastric	1.01457	12731.2	12740.5	48.97	1.98096	4.93841	260.17	3.92977e-05	7.5532e-08	FIRST_PASS
CM10	WEU0094	Gastric	1.01457	13373.5	13395.7	70.3868	6.12502	18.3827	190.315	4.02954e-05	1.05859e-07	FIRST_PASS
CM10	WEU0094	Gastric	1.01457	13803	13803	29.6479	0.323077	0.990672	465.565	4.09035e-05	4.39288e-08	ESTIMATED
CM10	WEU0094	Gastric	1.01457	13913.6	13913.6	148.548	0.457367	1.41068	93.6639	4.1067e-05	2.19446e-07	ESTIMATED
CM10	WEU0094	Gastric	1.01457	14136.2	14160.3	67.6045	2.33254	7.28921	209.458	4.14295e-05	9.88604e-08	FIRST_PASS
CM10	WEU0094	Gastric	1.01457	14724.3	14729.6	50.1165	5.8086	20.7953	293.908	4.22541e-05	7.18793e-08	FIRST_PASS
CM10	WEU0094	Gastric	1.01457	15152.9	15152.9	2159.38	0.552315	2.2174	7.01724	4.28569e-05	3.05369e-06	ESTIMATED
CM10	WEU0094	Gastric	1.01457	15310.6	15310.6	272.166	0.541175	2.27457	56.2546	4.30793e-05	3.82896e-07	ESTIMATED
CM10	WEU0094	Gastric	1.01457	15864.9	15864.9	240.048	0.195798	0.983175	66.0907	4.38522e-05	3.31758e-07	ESTIMATED
CM10	WEU0094	Gastric	1.01457	16033.6	16033.6	28.4207	0.207717	1.05653	564.151	4.40847e-05	3.90717e-08	ESTIMATED
CM10	WEU0094	Gastric	1.01457	16672.7	16672.7	129.17	4.88189	27.2831	129.076	4.49548e-05	1.74141e-07	ESTIMATED
CM10	WEU0094	Gastric	1.01457	16824.4	16838	86.6784	20.6885	119.478	194.258	4.51771e-05	1.16281e-07	FIRST_PASS
CM10	WEU0094	Gastric	1.01457	16960.1	16980.4	80.985	67.5614	401.663	209.673	4.53677e-05	1.08162e-07	FIRST_PASS
CM10	WEU0094	Gastric	1.01457	17122.2	17122.2	603.81	25.8779	158.476	28.3569	4.55567e-05	8.0363e-07	ESTIMATED
CM10	WEU0094	Gastric	1.01457	17164.7	17181.5	125.225	33.2141	205.99	137.205	4.56356e-05	1.66305e-07	FIRST_PASS
CM10	WEU0094	Gastric	1.01457	17320.2	17329.9	90.8025	17.8448	114.292	190.852	4.58322e-05	1.2e-07	FIRST_PASS
CM10	WEU0094	Gastric	1.01457	17500.5	17511.3	67.4841	11.4929	76.6634	259.488	4.60715e-05	8.875e-08	FIRST_PASS
CM10	WEU0094	Gastric	1.01457	17650.4	17641.3	101.179	9.68666	66.5848	174.357	4.62422e-05	1.325e-07	FIRST_PASS
CM10	WEU0094	Gastric	1.01457	18111.6	18111.6	79.3277	3.46955	26.7783	228.314	4.68545e-05	1.025e-07	ESTIMATED
CM10	WEU0094	Gastric	1.01457	18178.6	18193.3	598.441	3.41999	26.967	30.4012	4.69601e-05	7.72339e-07	SECOND_PASS
CM10	WEU0094	Gastric	1.01457	18269.1	18269.1	610.052	2.57922	20.7528	29.9468	4.70578e-05	7.8569e-07	ESTIMATED
CM10	WEU0094	Gastric	1.01457	18751.1	18751.1	754.391	1.00719	9.3038	24.8559	4.76745e-05	9.59017e-07	ESTIMATED
CM10	WEU0094	Gastric	1.01457	19150.3	19150.3	402.561	0.495468	5.20788	47.5711	4.81793e-05	5.06392e-07	ESTIMATED
CM10	WEU0094	Gastric	1.01457	20592.5	20612.6	88.1853	4.77659	40.2962	233.742	4.9985e-05	1.06904e-07	FIRST_PASS
CM10	WEU0094	Gastric	1.01457	20980.4	20980.4	1055.1	0.489747	3.90875	19.8847	5.0429e-05	1.26803e-06	ESTIMATED
CM10	WEU0094	Gastric	1.01457	21216.4	21216.4	815.472	0.411398	3.1744	26.0173	5.07117e-05	9.74578e-07	ESTIMATED
CM10	WEU0094	Gastric	1.01457	21364.9	21340.3	205.688	0.876871	6.65048	103.751	5.08597e-05	2.45059e-07	FIRST_PASS
CM10	WEU0094	Gastric	1.01457	22355.1	22355.1	471.662	0.9717	6.47611	47.3964	5.20549e-05	5.49144e-07	ESTIMATED
CM10	WEU0094	Gastric	1.01457	23650.4	23665.6	1373.02	1.70784	10.1737	17.2362	5.35589e-05	1.55795e-06	FIRST_PASS
CM10	WEU0099	Gastric	2.89173	1507.55	1507.55	58.6748	26.0531	7.43497	25.6932	1.35179e-05	2.63063e-07	ESTIMATED
CM10	WEU0099	Gastric	2.89173	1733.86	1733.86	87.4945	17.8412	5.19886	19.8168	1.44971e-05	3.64837e-07	ESTIMATED
CM10	WEU0099	Gastric	2.89173	1754.42	1752.44	13.4099	87.8205	25.6333	130.683	1.45745e-05	5.57583e-08	FIRST_PASS
CM10	WEU0099	Gastric	2.89173	1954.32	1954.32	17.7896	13.2885	4.43863	109.858	1.53912e-05	7.00505e-08	ESTIMATED
CM10	WEU0099	Gastric	2.89173	1977.43	1979.76	59.7137	15.5944	5.31646	33.1543	1.5491e-05	2.33703e-07	FIRST_PASS
CM10	WEU0099	Gastric	2.89173	1996.56	1996.56	64.1621	13.2437	4.57717	31.1174	1.55566e-05	2.49966e-07	ESTIMATED
CM10	WEU0099	Gastric	2.89173	2203.66	2202.77	44.7068	15.4606	6.3945	49.2715	1.63402e-05	1.65381e-07	FIRST_PASS
CM10	WEU0099	Gastric	2.89173	2222.28	2222.28	65.7713	10.3768	4.36584	33.788	1.64124e-05	2.42874e-07	ESTIMATED
CM10	WEU0099	Gastric	2.89173	2240.07	2240.07	61.8863	6.46734	2.74455	36.1965	1.6478e-05	2.27618e-07	ESTIMATED
CM10	WEU0099	Gastric	2.89173	2385.78	2386.41	13.1254	14.6843	6.6999	181.817	1.70077e-05	4.67677e-08	FIRST_PASS
CM10	WEU0099	Gastric	2.89173	2447.38	2448.29	36.5035	9.51003	4.47825	67.0699	1.72268e-05	1.28267e-07	FIRST_PASS
CM10	WEU0099	Gastric	2.89173	2544.27	2544.27	181.396	0.780017	0.38622	14.026	1.75612e-05	6.36256e-07	ESTIMATED
CM10	WEU0099	Gastric	2.89173	2578.52	2578.52	12.6348	0.0641871	0.0323687	204.081	1.7679e-05	4.32619e-08	ESTIMATED
CM10	WEU0099	Gastric	2.89173	2802.49	2804.53	21.9673	8.47055	4.83827	127.669	1.84376e-05	7.22274e-08	FIRST_PASS
CM10	WEU0099	Gastric	2.89173	2954.6	2950.51	9.09958	3.59465	2.20171	324.247	1.89113e-05	2.91753e-08	SECOND_PASS
CM10	WEU0099	Gastric	2.89173	3005.81	3005.81	10.5302	1.99634	1.25659	285.445	1.90877e-05	3.34235e-08	ESTIMATED
CM10	WEU0099	Gastric	2.89173	3031.71	3031.71	4.85611	0.925591	0.590206	624.308	1.91698e-05	1.53479e-08	ESTIMATED
CM10	WEU0099	Gastric	2.89173	3101.32	3101.32	113.602	-0.126031	-0.0832595	27.2999	1.93886e-05	3.525e-07	ESTIMATED
CM10	WEU0099	Gastric	2.89173	3360.52	3362.63	27.7112	9.87152	6.66775	121.346	2.01889e-05	8.31323e-08	FIRST_PASS
CM10	WEU0099	Gastric	2.89173	3380.96	3380.96	43.6141	4.96497	3.32761	77.5198	2.02438e-05	1.30747e-07	ESTIMATED
CM10	WEU0099	Gastric	2.89173	3454.61	3454.61	18.3092	1.87032	1.21589	188.682	2.04632e-05	5.42062e-08	ESTIMATED
CM10	WEU0099	Gastric	2.89173	3484.03	3484.03	1.27385	0.584759	0.375682	2735.03	2.05501e-05	3.75683e-09	ESTIMATED
CM10	WEU0099	Gastric	2.89173	3590.56	3591.02	27.5423	30.5152	18.808	130.382	2.08633e-05	7.99753e-08	FIRST_PASS
CM10	WEU0099	Gastric	2.89173	3722.3	3722.3	96.6773	0.080104	0.0470641	38.5023	2.12412e-05	2.775e-07	ESTIMATED
CM10	WEU0099	Gastric	2.89173	3905.3	3905.89	30.8815	36.6703	17.8507	126.48	2.17587e-05	8.59644e-08	FIRST_PASS
CM10	WEU0099	Gastric	2.89173	3933.25	3933.25	56.0984	12.6997	6.01464	70.1135	2.18348e-05	1.56014e-07	ESTIMATED
CM10	WEU0099	Gastric	2.89173	4037.3	4030.6	19.8959	6.55592	2.83406	202.584	2.21033e-05	5.45414e-08	FIRST_PASS
CM10	WEU0099	Gastric	2.89173	4065.01	4065.01	56.8874	0.635818	0.266699	71.4571	2.21975e-05	1.55737e-07	ESTIMATED
CM10	WEU0099	Gastric	2.89173	4146.61	4146.61	38.3356	0.0624859	0.0244983	108.166	2.24192e-05	1.0375e-07	ESTIMATED
CM10	WEU0099	Gastric	2.89173	4211.79	4211.79	39.3914	4.33106	1.61454	106.922	2.25947e-05	1.05711e-07	ESTIMATED
CM10	WEU0099	Gastric	2.89173	4376.6	4381.19	23.2662	144.646	47.8861	188.307	2.30446e-05	6.11832e-08	FIRST_PASS
CM10	WEU0099	Gastric	2.89173	4489.19	4495.05	25.2767	18.8327	5.80498	177.834	2.33421e-05	6.56267e-08	FIRST_PASS
CM10	WEU0099	Gastric	2.89173	4555.41	4553.4	27.5706	31.178	9.2855	165.154	2.34931e-05	7.11157e-08	FIRST_PASS
CM10	WEU0099	Gastric	2.89173	4585.09	4585.09	97.2801	17.6174	5.15274	47.1328	2.35747e-05	2.50088e-07	ESTIMATED
CM10	WEU0099	Gastric	2.89173	4645.37	4651.67	26.7154	79.8689	22.516	174.119	2.37453e-05	6.81757e-08	FIRST_PASS
CM10	WEU0099	Gastric	2.89173	4698.93	4698.93	672.864	14.2248	3.91045	6.98348	2.38656e-05	1.70872e-06	ESTIMATED
CM10	WEU0099	Gastric	2.89173	4767.2	4766.74	23.5269	566.024	152.415	202.608	2.40372e-05	5.93152e-08	FIRST_PASS
CM10	WEU0099	Gastric	2.89173	4908.07	4914.27	30.2955	20.5841	6.69887	162.211	2.44063e-05	7.52301e-08	SECOND_PASS
CM10	WEU0099	Gastric	2.89173	4976.17	4974.74	41.7292	51.2789	18.2303	119.215	2.4556e-05	1.02949e-07	FIRST_PASS
CM10	WEU0099	Gastric	2.89173	5084.44	5086.1	31.6304	18.908	8.08646	160.798	2.48294e-05	7.71892e-08	FIRST_PASS
CM10	WEU0099	Gastric	2.89173	5303.71	5303.71	63.0994	2.48023	1.73973	84.0532	2.53549e-05	1.50827e-07	ESTIMATED
CM10	WEU0099	Gastric	2.89173	5402.2	5402.2	30.2601	1.04356	0.916293	178.526	2.55893e-05	7.16669e-08	ESTIMATED
CM10	WEU0099	Gastric	2.89173	5524.52	5524.52	46.6153	0.832531	0.792971	118.513	2.58774e-05	1.09334e-07	ESTIMATED
CM10	WEU0099	Gastric	2.89173	5619.57	5619.57	6.90329	0.136371	0.138955	814.043	2.6099e-05	1.60263e-08	ESTIMATED
CM10	WEU0099	Gastric	2.89173	5709.09	5709.09	47.6333	0.838508	0.913969	119.855	2.63061e-05	1.09816e-07	ESTIMATED
CM10	WEU0099	Gastric	2.89173	5818.95	5818.95	46.9214	1.11101	1.32325	124.015	2.6558e-05	1.06973e-07	ESTIMATED
CM10	WEU0099	Gastric	2.89173	5885.74	5887.94	31.7234	3.83447	4.80571	185.603	2.6715e-05	7.19502e-08	FIRST_PASS
CM10	WEU0099	Gastric	2.89173	6201.92	6203.42	38.9605	3.0921	4.00429	159.223	2.74213e-05	8.60944e-08	FIRST_PASS
CM10	WEU0099	Gastric	2.89173	6358.11	6356.47	42.6106	2.48945	3.27574	149.176	2.77575e-05	9.29887e-08	SECOND_PASS
CM10	WEU0099	Gastric	2.89173	6448.74	6448.74	159.337	1.07538	1.42877	40.4722	2.79583e-05	3.46737e-07	ESTIMATED
CM10	WEU0099	Gastric	2.89173	6699.18	6698	37.4886	1.84741	2.54363	178.667	2.84935e-05	7.9693e-08	FIRST_PASS
CM10	WEU0099	Gastric	2.89173	7098.61	7098.61	35.1927	0.722577	1.13154	201.707	2.93332e-05	7.27133e-08	ESTIMATED
CM10	WEU0099	Gastric	2.89173	7273.9	7273.9	36.2091	0.688136	1.14502	200.886	2.96932e-05	7.39055e-08	ESTIMATED
CM10	WEU0099	Gastric	2.89173	7327.57	7328.04	31.2385	5.56377	9.43872	234.584	2.98035e-05	6.35144e-08	FIRST_PASS
CM10	WEU0099	Gastric	2.89173	7371.7	7371.7	134.385	1.03347	1.78122	54.8552	2.98921e-05	2.72464e-07	ESTIMATED
CM10	WEU0099	Gastric	2.89173	7498.7	7498.7	111.351	0.818068	1.38613	67.343	3.01485e-05	2.2343e-07	ESTIMATED
CM10	WEU0099	Gastric	2.89173	7686.69	7685.84	46.9434	2.06104	3.37084	163.726	3.05224e-05	9.32046e-08	FIRST_PASS
CM10	WEU0099	Gastric	2.89173	8039.87	8035.62	40.0576	3.83584	5.94938	200.602	3.12092e-05	7.77497e-08	FIRST_PASS
CM10	WEU0099	Gastric	2.89173	8204.63	8204.63	36.7918	0.501519	0.802546	223.002	3.15357e-05	7.06703e-08	ESTIMATED
CM10	WEU0099	Gastric	2.89173	8316.73	8316.73	10.7539	0.798648	1.30526	773.367	3.17504e-05	2.05274e-08	ESTIMATED
CM10	WEU0099	Gastric	2.89173	8414.87	8425.68	54.4638	6.64369	11.0862	154.702	3.19577e-05	1.03288e-07	FIRST_PASS
CM10	WEU0099	Gastric	2.89173	8485.43	8497.04	69.6109	14.0652	23.7961	122.065	3.20927e-05	1.31394e-07	FIRST_PASS
CM10	WEU0099	Gastric	2.89173	8577.95	8594.71	100.285	8.48555	14.6329	85.7032	3.22767e-05	1.88305e-07	FIRST_PASS
CM10	WEU0099	Gastric	2.89173	8794.7	8794.7	860.321	2.26336	4.06191	10.2226	3.265e-05	1.59696e-06	ESTIMATED
CM10	WEU0099	Gastric	2.89173	8879.33	8879.33	47.3887	1.83125	3.34356	187.372	3.28067e-05	8.75e-08	ESTIMATED
CM10	WEU0099	Gastric	2.89173	9114.7	9140.16	75.5947	9.78845	18.8735	120.91	3.32851e-05	1.37706e-07	FIRST_PASS
CM10	WEU0099	Gastric	2.89173	9515.82	9528.92	42.7417	9.49171	19.9373	222.942	3.39856e-05	7.62058e-08	FIRST_PASS
CM10	WEU0099	Gastric	2.89173	9618.76	9618.76	1311.49	3.50163	7.5083	7.33425	3.41454e-05	2.32781e-06	ESTIMATED
CM10	WEU0099	Gastric	2.89173	9788.19	9793.62	100.331	13.175	29.0286	97.6135	3.44544e-05	1.76367e-07	FIRST_PASS
CM10	WEU0099	Gastric	2.89173	9980.84	9980.84	191.776	5.0757	11.3119	52.0444	3.47822e-05	3.35e-07	ESTIMATED
CM10	WEU0099	Gastric	2.89173	10079.5	10079.5	12.9786	3.50016	7.84774	776.621	3.49536e-05	2.25e-08	ESTIMATED
CM10	WEU0099	Gastric	2.89173	10117.5	10117.5	29.6215	3.55025	7.97862	341.561	3.50196e-05	5.125e-08	ESTIMATED
CM10	WEU0099	Gastric	2.89173	10232.2	10238.5	54.3761	10.6676	24.152	188.29	3.52283e-05	9.35187e-08	FIRST_PASS
CM10	WEU0099	Gastric	2.89173	10309.1	10309.1	392.978	4.99591	11.3601	26.2334	3.53496e-05	6.73752e-07	ESTIMATED
CM10	WEU0099	Gastric	2.89173	10447.6	10455.7	58.74	4.11855	9.44974	178	3.56e-05	1e-07	SECOND_PASS
CM10	WEU0099	Gastric	2.89173	10570.1	10551.3	261.856	3.29483	7.60437	40.2944	3.57624e-05	4.43764e-07	SECOND_PASS
CM10	WEU0099	Gastric	2.89173	10681.8	10681.8	47.5483	1.6773	3.9024	224.652	3.59829e-05	8e-08	ESTIMATED
CM10	WEU0099	Gastric	2.89173	10806	10806	264.083	1.63753	3.83917	40.9188	3.61913e-05	4.42233e-07	ESTIMATED
CM10	WEU0099	Gastric	2.89173	10869.9	10867.2	72.06	3.09831	7.29148	150.807	3.62937e-05	1.20353e-07	FIRST_PASS
CM10	WEU0099	Gastric	2.89173	10982.1	10982.1	21.8222	0.755067	1.78964	503.252	3.64851e-05	3.625e-08	ESTIMATED
CM10	WEU0099	Gastric	2.89173	11090.1	11090.1	41.1978	0.550276	1.31302	269.192	3.66641e-05	6.81003e-08	ESTIMATED
CM10	WEU0099	Gastric	2.89173	11782.6	11769.1	51.0879	28.3	62.7649	230.37	3.77698e-05	8.19668e-08	FIRST_PASS
CM10	WEU0099	Gastric	2.89173	11984.7	11979.4	119.267	8.00105	18.7652	100.442	3.81057e-05	1.89691e-07	FIRST_PASS
CM10	WEU0099	Gastric	2.89173	12300	12300	888.164	2.20328	5.6579	13.8488	3.86123e-05	1.40941e-06	ESTIMATED
CM10	WEU0099	Gastric	2.89173	12731.2	12731.2	139.217	0.467309	1.43723	91.449	3.92833e-05	2.14407e-07	ESTIMATED
CM10	WEU0099	Gastric	2.89173	13373.5	13401.1	79.3774	6.68935	22.7527	168.828	4.03036e-05	1.19353e-07	FIRST_PASS
CM10	WEU0099	Gastric	2.89173	13803	13803	168.63	0.902673	2.82548	81.8541	4.09035e-05	2.49856e-07	ESTIMATED
CM10	WEU0099	Gastric	2.89173	13913.6	13916.7	230.894	1.33839	4.09781	60.2731	4.10715e-05	3.41231e-07	FIRST_PASS
CM10	WEU0099	Gastric	2.89173	14136.2	14136.2	194.432	0.84975	2.61207	72.7052	4.13942e-05	2.84671e-07	ESTIMATED
CM10	WEU0099	Gastric	2.89173	14724.3	14736.6	115.89	1.39444	5.16233	127.16	4.22641e-05	1.66149e-07	FIRST_PASS
CM10	WEU0099	Gastric	2.89173	15152.9	15152.9	786.195	1.2368	5.31949	19.2737	4.28569e-05	1.10783e-06	ESTIMATED
CM10	WEU0099	Gastric	2.89173	15310.6	15257.8	412.172	2.37931	10.6642	37.018	4.3005e-05	5.80258e-07	FIRST_PASS
CM10	WEU0099	Gastric	2.89173	15864.9	15864.9	89.6393	0.448509	2.64839	176.986	4.38522e-05	1.2375e-07	ESTIMATED
CM10	WEU0099	Gastric	2.89173	16033.6	16033.6	37.2956	0.306937	1.98536	429.905	4.40847e-05	5.125e-08	ESTIMATED
CM10	WEU0099	Gastric	2.89173	16672.7	16672.7	166.527	5.92879	41.6078	100.12	4.49548e-05	2.24505e-07	ESTIMATED
CM10	WEU0099	Gastric	2.89173	16824.4	16842.8	111.96	25.3394	179.633	150.436	4.51835e-05	1.50175e-07	FIRST_PASS
CM10	WEU0099	Gastric	2.89173	16960.1	16985.3	139.697	49.1115	351.128	121.587	4.53743e-05	1.86505e-07	FIRST_PASS
CM10	WEU0099	Gastric	2.89173	17122.2	17130.7	31.95	25.891	186.73	536.172	4.55681e-05	4.25e-08	SECOND_PASS
CM10	WEU0099	Gastric	2.89173	17164.7	17171.5	74.396	26.0057	188.016	230.812	4.56222e-05	9.875e-08	FIRST_PASS
CM10	WEU0099	Gastric	2.89173	17320.2	17335	82.3104	15.8232	115.531	210.605	4.58389e-05	1.0875e-07	FIRST_PASS
CM10	WEU0099	Gastric	2.89173	17500.5	17514.2	839.106	11.8851	87.7252	20.8724	4.60753e-05	1.10374e-06	FIRST_PASS
CM10	WEU0099	Gastric	2.89173	17650.4	17650.4	774.158	10.024	74.6045	22.7995	4.62541e-05	1.01437e-06	ESTIMATED
CM10	WEU0099	Gastric	2.89173	18111.6	18111.6	24.1669	4.41016	33.7669	749.438	4.68545e-05	3.125e-08	ESTIMATED
CM10	WEU0099	Gastric	2.89173	18178.6	18178.6	55.2117	4.15816	31.97	329.253	4.69411e-05	7.125e-08	ESTIMATED
CM10	WEU0099	Gastric	2.89173	18269.1	18269.1	858.764	3.3562	25.9499	21.2737	4.70578e-05	1.10601e-06	ESTIMATED
CM10	WEU0099	Gastric	2.89173	18751.1	18751.1	131.927	1.6233	12.9372	142.132	4.76745e-05	1.675e-07	ESTIMATED
CM10	WEU0099	Gastric	2.89173	19150.3	19150.3	501.209	1.30614	10.6783	38.2082	4.81793e-05	6.30484e-07	ESTIMATED
CM10	WEU0099	Gastric	2.89173	20592.5	20605.8	98.8614	2.20608	14.7085	208.431	4.99768e-05	1.19871e-07	FIRST_PASS
CM10	WEU0099	Gastric	2.89173	20980.4	20980.4	982.182	0.46772	2.64857	21.361	5.0429e-05	1.1804e-06	ESTIMATED
CM10	WEU0099	Gastric	2.89173	21216.4	21216.4	122.21	0.493858	2.92658	173.605	5.07117e-05	1.4625e-07	ESTIMATED
CM10	WEU0099	Gastric	2.89173	21364.9	21364.9	133.287	0.596803	3.64276	160.292	5.08889e-05	1.5875e-07	ESTIMATED
CM10	WEU0099	Gastric	2.89173	22355.1	22327.2	341.776	0.965622	7.29392	65.327	5.20224e-05	3.975e-07	FIRST_PASS
CM10	WEU0099	Gastric	2.89173	23650.4	23681.1	1098.96	1.44014	16.132	21.5488	5.35765e-05	1.23791e-06	FIRST_PASS
CM10	WEU0108	Gastric	1.40612	1507.55	1507.27	21.036	42.3044	8.90216	71.652	1.35166e-05	9.43216e-08	FIRST_PASS
CM10	WEU0108	Gastric	1.40612	1733.86	1731.66	21.842	36.4259	6.85551	79.2814	1.44879e-05	9.14063e-08	FIRST_PASS
CM10	WEU0108	Gastric	1.40612	1754.42	1754.4	48.1346	28.4539	5.34645	36.4478	1.45827e-05	2.00049e-07	SECOND_PASS
CM10	WEU0108	Gastric	1.40612	1954.32	1954.32	17.1102	15.3948	2.85313	114.22	1.53912e-05	6.73751e-08	ESTIMATED
CM10	WEU0108	Gastric	1.40612	1977.43	1977.43	92.5067	16.5078	3.05472	21.3761	1.54819e-05	3.62131e-07	ESTIMATED
CM10	WEU0108	Gastric	1.40612	1996.56	1994.15	53.5721	20.5684	3.80192	37.2237	1.55472e-05	2.08869e-07	FIRST_PASS
CM10	WEU0108	Gastric	1.40612	2203.66	2203.66	23.1523	18.8877	3.44502	95.1811	1.63435e-05	8.58548e-08	ESTIMATED
CM10	WEU0108	Gastric	1.40612	2222.28	2222.28	88.2093	11.796	2.14906	25.1932	1.64124e-05	3.2573e-07	ESTIMATED
CM10	WEU0108	Gastric	1.40612	2240.07	2241.91	18.6902	27.4114	4.98798	119.951	1.64847e-05	6.87156e-08	FIRST_PASS
CM10	WEU0108	Gastric	1.40612	2385.78	2385.78	16.5762	6.37897	1.18521	143.928	1.70055e-05	5.9026e-08	ESTIMATED
CM10	WEU0108	Gastric	1.40612	2447.38	2444.81	17.2261	20.6766	3.8849	141.925	1.72145e-05	6.06588e-08	FIRST_PASS
CM10	WEU0108	Gastric	1.40612	2544.27	2544.27	30.7833	2.88399	0.552163	82.6511	1.75612e-05	1.06161e-07	ESTIMATED
CM10	WEU0108	Gastric	1.40612	2578.52	2578.52	21.0988	4.75502	0.916299	122.212	1.7679e-05	7.23496e-08	ESTIMATED
CM10	WEU0108	Gastric	1.40612	2802.49	2802.49	63.1401	9.20103	1.87469	44.3853	1.84308e-05	2.0856e-07	ESTIMATED
CM10	WEU0108	Gastric	1.40612	2954.6	2954.53	16.7079	12.9143	2.79376	176.834	1.89242e-05	5.35117e-08	FIRST_PASS
CM10	WEU0108	Gastric	1.40612	3005.81	3005.81	3.53705	0.56044	0.123774	849.805	1.90877e-05	1.12282e-08	ESTIMATED
CM10	WEU0108	Gastric	1.40612	3031.71	3031.71	23.3881	2.41665	0.539375	129.626	1.91698e-05	7.38052e-08	ESTIMATED
CM10	WEU0108	Gastric	1.40612	3101.32	3101.32	21.1235	3.50772	0.805662	146.818	1.93886e-05	6.59485e-08	ESTIMATED
CM10	WEU0108	Gastric	1.40612	3360.52	3360.52	58.4579	3.35036	0.78099	57.4861	2.01825e-05	1.7529e-07	ESTIMATED
CM10	WEU0108	Gastric	1.40612	3380.96	3382.97	22.8395	10.0641	2.34169	148.119	2.02499e-05	6.83529e-08	SECOND_PASS
CM10	WEU0108	Gastric	1.40612	3454.61	3455.38	24.8223	10.9325	2.52884	139.205	2.04654e-05	7.34995e-08	SECOND_PASS
CM10	WEU0108	Gastric	1.40612	3484.03	3484.03	73.1457	5.65096	1.30415	47.6314	2.05501e-05	2.15947e-07	ESTIMATED
CM10	WEU0108	Gastric	1.40612	3590.56	3590.56	26.286	5.79213	1.32553	136.596	2.08619e-05	7.63989e-08	ESTIMATED
CM10	WEU0108	Gastric	1.40612	3722.3	3724.25	29.1619	30.418	6.88993	127.709	2.12467e-05	8.31602e-08	FIRST_PASS
CM10	WEU0108	Gastric	1.40612	3905.3	3905.3	96.9327	1.29742	0.28994	40.2887	2.1757e-05	2.68467e-07	ESTIMATED
CM10	WEU0108	Gastric	1.40612	3933.25	3936.48	30.2047	43.5886	9.71884	130.327	2.18437e-05	8.37958e-08	FIRST_PASS
CM10	WEU0108	Gastric	1.40612	4037.3	4037.3	53.4615	14.0229	2.63617	75.5179	2.21217e-05	1.46204e-07	ESTIMATED
CM10	WEU0108	Gastric	1.40612	4065.01	4059.59	44.9749	21.9098	3.97037	90.2635	2.21827e-05	1.22995e-07	FIRST_PASS
CM10	WEU0108	Gastric	1.40612	4146.61	4146.61	42.7162	9.15619	1.45577	97.0733	2.24192e-05	1.15388e-07	ESTIMATED
CM10	WEU0108	Gastric	1.40612	4211.79	4211.79	17.0391	5.65389	0.823929	247.184	2.25947e-05	4.57018e-08	ESTIMATED
CM10	WEU0108	Gastric	1.40612	4376.6	4381.7	26.856	70.5494	8.4654	163.155	2.30459e-05	7.06296e-08	FIRST_PASS
CM10	WEU0108	Gastric	1.40612	4489.19	4489.19	25.4953	12.222	1.39909	176.079	2.33269e-05	6.62041e-08	ESTIMATED
CM10	WEU0108	Gastric	1.40612	4555.41	4555.41	29.3117	10.446	1.23288	155.413	2.34983e-05	7.55877e-08	ESTIMATED
CM10	WEU0108	Gastric	1.40612	4585.09	4585.09	34.3874	7.55572	0.904257	133.336	2.35747e-05	8.84034e-08	ESTIMATED
CM10	WEU0108	Gastric	1.40612	4645.37	4645.37	20.5547	8.13228	1.00165	226	2.37292e-05	5.25209e-08	ESTIMATED
CM10	WEU0108	Gastric	1.40612	4698.93	4698.93	13.9883	3.68849	0.466321	335.918	2.38656e-05	3.55293e-08	ESTIMATED
CM10	WEU0108	Gastric	1.40612	4767.2	4768.28	24.7852	252.725	33.0759	192.384	2.40411e-05	6.24871e-08	FIRST_PASS
CM10	WEU0108	Gastric	1.40612	4908.07	4908.07	134.265	10.137	1.42686	36.5551	2.43909e-05	3.31752e-07	ESTIMATED
CM10	WEU0108	Gastric	1.40612	4976.17	4980.76	45.1612	23.3172	3.4147	110.289	2.45709e-05	1.11369e-07	FIRST_PASS
CM10	WEU0108	Gastric	1.40612	5084.44	5084.44	32.0555	16.4879	2.56086	158.614	2.48253e-05	7.82002e-08	ESTIMATED
CM10	WEU0108	Gastric	1.40612	5303.71	5303.71	36.8297	13.2978	2.32125	144.006	2.53549e-05	8.80082e-08	ESTIMATED
CM10	WEU0108	Gastric	1.40612	5402.2	5406.02	34.8593	15.4774	2.85823	155.081	2.55983e-05	8.25492e-08	SECOND_PASS
CM10	WEU0108	Gastric	1.40612	5524.52	5513.38	36.8692	30.1646	5.92742	149.539	2.58513e-05	8.64489e-08	FIRST_PASS
CM10	WEU0108	Gastric	1.40612	5619.57	5619.57	161.672	8.17749	1.71448	34.7592	2.6099e-05	3.77741e-07	ESTIMATED
CM10	WEU0108	Gastric	1.40612	5709.09	5716.38	36.0994	35.003	7.81119	158.351	2.63229e-05	8.31215e-08	FIRST_PASS
CM10	WEU0108	Gastric	1.40612	5818.95	5818.95	70.6566	6.48606	1.5524	82.3554	2.6558e-05	1.61206e-07	ESTIMATED
CM10	WEU0108	Gastric	1.40612	5885.74	5885.74	169.616	4.35981	1.09482	34.7005	2.671e-05	3.84865e-07	ESTIMATED
CM10	WEU0108	Gastric	1.40612	6201.92	6201.94	43.4999	10.332	3.36411	142.574	2.74181e-05	9.61209e-08	FIRST_PASS
CM10	WEU0108	Gastric	1.40612	6358.11	6356.02	35.0004	7.01593	2.64253	181.599	2.77566e-05	7.64212e-08	SECOND_PASS
CM10	WEU0108	Gastric	1.40612	6448.74	6448.74	40.8438	3.84683	1.59818	157.888	2.79583e-05	8.85406e-08	ESTIMATED
CM10	WEU0108	Gastric	1.40612	6699.18	6705.18	49.3234	3.66947	2.1209	135.943	2.85088e-05	1.04847e-07	SECOND_PASS
CM10	WEU0108	Gastric	1.40612	7098.61	7098.61	28.3388	1.18286	0.864025	250.49	2.93332e-05	5.85842e-08	ESTIMATED
CM10	WEU0108	Gastric	1.40612	7273.9	7273.9	9.92308	0.0556819	0.0372375	733.028	2.96932e-05	2.02592e-08	ESTIMATED
CM10	WEU0108	Gastric	1.40612	7327.57	7327.57	71.1194	4.83917	3.15526	103.032	2.98025e-05	1.44418e-07	ESTIMATED
CM10	WEU0108	Gastric	1.40612	7371.7	7364.03	69.4387	5.24041	3.35994	106.051	2.98766e-05	1.41004e-07	FIRST_PASS
CM10	WEU0108	Gastric	1.40612	7498.7	7498.7	61.3382	2.51507	1.57793	122.252	3.01485e-05	1.23226e-07	ESTIMATED
CM10	WEU0108	Gastric	1.40612	7686.69	7674.72	42.4099	4.76208	3.07266	180.966	3.05003e-05	8.43066e-08	FIRST_PASS
CM10	WEU0108	Gastric	1.40612	8039.87	8040.35	58.7176	14.288	9.7873	136.933	3.12184e-05	1.13917e-07	FIRST_PASS
CM10	WEU0108	Gastric	1.40612	8204.63	8206.59	36.5864	8.13401	5.72974	224.307	3.15395e-05	7.02957e-08	FIRST_PASS
CM10	WEU0108	Gastric	1.40612	8316.73	8318.68	33.5177	5.14235	3.68792	248.188	3.17541e-05	6.39693e-08	SECOND_PASS
CM10	WEU0108	Gastric	1.40612	8414.87	8417.47	52.8055	7.82396	5.68363	159.405	3.19421e-05	1.0015e-07	FIRST_PASS
CM10	WEU0108	Gastric	1.40612	8485.43	8488.26	42.7493	14.3176	10.4977	198.559	3.20762e-05	8.07545e-08	FIRST_PASS
CM10	WEU0108	Gastric	1.40612	8577.95	8577.95	232.089	6.43786	4.77626	36.9597	3.22452e-05	4.38187e-07	ESTIMATED
CM10	WEU0108	Gastric	1.40612	8794.7	8795.15	32.8216	18.8614	14.4037	267.968	3.26509e-05	6.09235e-08	FIRST_PASS
CM10	WEU0108	Gastric	1.40612	8879.33	8870.07	41.9257	14.5615	11.2327	211.567	3.27896e-05	7.74919e-08	FIRST_PASS
CM10	WEU0108	Gastric	1.40612	9114.7	9101.6	49.7641	23.8106	18.9562	182.895	3.32148e-05	9.07783e-08	FIRST_PASS
CM10	WEU0108	Gastric	1.40612	9515.82	9515.82	46.1658	0.996257	0.840495	206.123	3.39622e-05	8.24008e-08	ESTIMATED
CM10	WEU0108	Gastric	1.40612	9618.76	9650.55	59.3695	7.89826	6.79339	162.55	3.42018e-05	1.05228e-07	FIRST_PASS
CM10	WEU0108	Gastric	1.40612	9788.19	9777.41	45.5308	63.1243	55.3031	214.743	3.44259e-05	8.01378e-08	FIRST_PASS
CM10	WEU0108	Gastric	1.40612	9980.84	9961.59	49.4553	15.8774	14.2928	201.426	3.47486e-05	8.625e-08	FIRST_PASS
CM10	WEU0108	Gastric	1.40612	10079.5	10077	38.2115	37.381	34.2358	263.716	3.49493e-05	6.62697e-08	FIRST_PASS
CM10	WEU0108	Gastric	1.40612	10117.5	10117.5	870.124	9.55617	8.80577	11.6277	3.50196e-05	1.50335e-06	ESTIMATED
CM10	WEU0108	Gastric	1.40612	10232.2	10237.2	73.0816	16.0989	15.1067	140.079	3.52259e-05	1.25736e-07	FIRST_PASS
CM10	WEU0108	Gastric	1.40612	10309.1	10292.2	68.5425	12.3897	11.7246	150.157	3.53205e-05	1.175e-07	FIRST_PASS
CM10	WEU0108	Gastric	1.40612	10447.6	10470.7	59.303	11.6185	11.2514	176.563	3.56255e-05	1.00886e-07	FIRST_PASS
CM10	WEU0108	Gastric	1.40612	10570.1	10554	51.4196	12.4731	12.1191	205.252	3.57669e-05	8.71282e-08	FIRST_PASS
CM10	WEU0108	Gastric	1.40612	10681.8	10681.8	78.2852	3.96418	3.87126	136.448	3.59829e-05	1.31856e-07	ESTIMATED
CM10	WEU0108	Gastric	1.40612	10806	10806	185.051	3.0745	3.01724	58.3944	3.61913e-05	3.09498e-07	ESTIMATED
CM10	WEU0108	Gastric	1.40612	10869.9	10864.6	74.6423	7.12033	7.00399	145.555	3.62894e-05	1.24719e-07	FIRST_PASS
CM10	WEU0108	Gastric	1.40612	10982.1	10982.1	89.0621	2.41409	2.38573	123.308	3.64851e-05	1.47943e-07	ESTIMATED
CM10	WEU0108	Gastric	1.40612	11090.1	11090.1	102.36	2.69394	2.6737	108.344	3.66641e-05	1.69202e-07	ESTIMATED
CM10	WEU0108	Gastric	1.40612	11782.6	11761.1	61.3429	10.9837	11.6517	191.727	3.77569e-05	9.8454e-08	FIRST_PASS
CM10	WEU0108	Gastric	1.40612	11984.7	11984.7	358.443	3.11848	3.58351	33.4353	3.81141e-05	5.73104e-07	ESTIMATED
CM10	WEU0108	Gastric	1.40612	12300	12323.1	75.6414	1.95722	2.5712	162.915	3.86485e-05	1.18546e-07	SECOND_PASS
CM10	WEU0108	Gastric	1.40612	12731.2	12729.5	67.3981	1.87925	2.9846	188.87	3.92806e-05	1.0396e-07	SECOND_PASS
CM10	WEU0108	Gastric	1.40612	13373.5	13390.5	61.7181	10.0151	23.8405	216.962	4.02876e-05	9.28379e-08	FIRST_PASS
CM10	WEU0108	Gastric	1.40612	13803	13843.2	56.608	0.864849	2.13959	244.545	4.09629e-05	8.37413e-08	SECOND_PASS
CM10	WEU0108	Gastric	1.40612	13913.6	13913.6	30.0959	0.022635	0.0554034	462.309	4.1067e-05	4.43963e-08	ESTIMATED
CM10	WEU0108	Gastric	1.40612	14136.2	14154.5	32.0964	1.17819	2.78326	440.999	4.14209e-05	4.69592e-08	FIRST_PASS
CM10	WEU0108	Gastric	1.40612	14724.3	14725.6	50.0907	17.5199	46.6282	293.978	4.22483e-05	7.18575e-08	FIRST_PASS
CM10	WEU0108	Gastric	1.40612	15152.9	15152.9	1215.41	1.48185	4.49816	12.4674	4.28569e-05	1.71877e-06	ESTIMATED
CM10	WEU0108	Gastric	1.40612	15310.6	15310.6	287.216	1.01188	3.23785	53.3069	4.30793e-05	4.04069e-07	ESTIMATED
CM10	WEU0108	Gastric	1.40612	15864.9	15869.4	105.699	0.861831	3.02162	150.138	4.38585e-05	1.45939e-07	FIRST_PASS
CM10	WEU0108	Gastric	1.40612	16033.6	16033.6	279.187	0.257418	0.906642	57.4294	4.40847e-05	3.85009e-07	ESTIMATED
CM10	WEU0108	Gastric	1.40612	16672.7	16672.7	1433.4	6.35637	23.9806	11.6315	4.49548e-05	1.89616e-06	ESTIMATED
CM10	WEU0108	Gastric	1.40612	16824.4	16828.9	80.2591	27.6612	106.642	209.682	4.51649e-05	1.07699e-07	FIRST_PASS
CM10	WEU0108	Gastric	1.40612	16960.1	16972.6	86.3551	53.3107	209.735	196.544	4.53572e-05	1.15363e-07	FIRST_PASS
CM10	WEU0108	Gastric	1.40612	17122.2	17124.1	33.8234	21.4691	86.319	506.28	4.55593e-05	4.5e-08	FIRST_PASS
CM10	WEU0108	Gastric	1.40612	17164.7	17170.2	152.823	21.5255	87.1259	112.353	4.56205e-05	2.03022e-07	FIRST_PASS
CM10	WEU0108	Gastric	1.40612	17320.2	17323.1	93.622	11.9848	49.6103	185.033	4.58233e-05	1.2375e-07	FIRST_PASS
CM10	WEU0108	Gastric	1.40612	17500.5	17507.5	71.2821	9.4892	40.379	245.609	4.60665e-05	9.375e-08	FIRST_PASS
CM10	WEU0108	Gastric	1.40612	17650.4	17642.9	561.466	7.62783	33.1364	31.423	4.62443e-05	7.35836e-07	FIRST_PASS
CM10	WEU0108	Gastric	1.40612	18111.6	18111.6	27.0601	3.46598	16.2193	669.311	4.68545e-05	3.5e-08	ESTIMATED
CM10	WEU0108	Gastric	1.40612	18178.6	18178.6	62.954	3.35439	15.8709	288.76	4.69411e-05	8.125e-08	ESTIMATED
CM10	WEU0108	Gastric	1.40612	18269.1	18269.1	628.318	2.70192	12.9776	29.0762	4.70578e-05	8.09215e-07	ESTIMATED
CM10	WEU0108	Gastric	1.40612	18751.1	18751.1	552.367	1.02929	5.37425	33.9468	4.76745e-05	7.02195e-07	ESTIMATED
CM10	WEU0108	Gastric	1.40612	19150.3	19150.3	485.283	0.462698	2.60127	39.462	4.81793e-05	6.10452e-07	ESTIMATED
CM10	WEU0108	Gastric	1.40612	20592.5	20596.3	78.4044	5.56965	39.406	262.693	4.99652e-05	9.50891e-08	FIRST_PASS
CM10	WEU0108	Gastric	1.40612	20980.4	20980.4	1100.19	0.637226	4.67642	19.0698	5.0429e-05	1.32222e-06	ESTIMATED
CM10	WEU0108	Gastric	1.40612	21216.4	21216.4	130.592	0.721793	5.42015	162.463	5.07117e-05	1.5625e-07	ESTIMATED
CM10	WEU0108	Gastric	1.40612	21364.9	21364.9	117.558	0.807694	6.15486	181.74	5.08889e-05	1.4e-07	ESTIMATED
CM10	WEU0108	Gastric	1.40612	22355.1	22334.2	448.723	2.9522	24.8643	49.7727	5.20305e-05	5.21883e-07	FIRST_PASS
CM10	WEU0108	Gastric	1.40612	23650.4	23652.5	1102.2	1.90949	18.6905	21.4593	5.35441e-05	1.24757e-06	FIRST_PASS
CM10	WEU0115	Gastric	1.88625	1507.55	1507.55	14.3245	19.3485	3.4612	105.242	1.35179e-05	6.42226e-08	ESTIMATED
CM10	WEU0115	Gastric	1.88625	1733.86	1728.45	11.4691	19.645	3.54924	150.705	1.44744e-05	4.8031e-08	FIRST_PASS
CM10	WEU0115	Gastric	1.88625	1754.42	1754.42	41.0739	10.7031	1.9359	42.7137	1.45827e-05	1.71365e-07	ESTIMATED
CM10	WEU0115	Gastric	1.88625	1954.32	1954.32	10.2937	9.15434	1.76572	189.856	1.53912e-05	4.05004e-08	ESTIMATED
CM10	WEU0115	Gastric	1.88625	1977.43	1974.26	17.8547	12.5599	2.44637	110.574	1.54695e-05	6.98872e-08	FIRST_PASS
CM10	WEU0115	Gastric	1.88625	1996.56	1996.56	12.4596	7.25995	1.42967	160.243	1.55566e-05	4.85407e-08	ESTIMATED
CM10	WEU0115	Gastric	1.88625	2203.66	2202.91	18.5265	28.249	6.15871	118.905	1.63407e-05	6.87457e-08	FIRST_PASS
CM10	WEU0115	Gastric	1.88625	2222.28	2222.28	35.8669	6.75151	1.47669	61.9591	1.64124e-05	1.32897e-07	ESTIMATED
CM10	WEU0115	Gastric	1.88625	2240.07	2240.07	21.9718	5.12908	1.12515	101.952	1.6478e-05	8.08708e-08	ESTIMATED
CM10	WEU0115	Gastric	1.88625	2385.78	2386.04	11.7735	15.4997	3.48334	202.662	1.70064e-05	4.19701e-08	FIRST_PASS
CM10	WEU0115	Gastric	1.88625	2447.38	2445.08	18.7691	34.1069	7.74001	130.272	1.72155e-05	6.60643e-08	FIRST_PASS
CM10	WEU0115	Gastric	1.88625	2544.27	2544.27	24.6836	1.97929	0.456547	103.075	1.75612e-05	8.52152e-08	ESTIMATED
CM10	WEU0115	Gastric	1.88625	2578.52	2579.58	15.8534	7.24738	1.6814	162.715	1.76827e-05	5.43439e-08	SECOND_PASS
CM10	WEU0115	Gastric	1.88625	2802.49	2800.67	18.9022	112.494	27.7675	148.167	1.84249e-05	6.21784e-08	FIRST_PASS
CM10	WEU0115	Gastric	1.88625	2954.6	2954.6	1.9475	0.509916	0.134153	1517.12	1.89244e-05	6.23615e-09	ESTIMATED
CM10	WEU0115	Gastric	1.88625	3005.81	3006.36	29.2899	9.81456	2.63952	102.642	1.90895e-05	9.28969e-08	FIRST_PASS
CM10	WEU0115	Gastric	1.88625	3031.71	3031.71	46.5681	4.32273	1.17527	65.1027	1.91698e-05	1.47617e-07	ESTIMATED
CM10	WEU0115	Gastric	1.88625	3101.32	3101.3	7.59434	5.16018	1.44605	408.37	1.93885e-05	2.37331e-08	SECOND_PASS
CM10	WEU0115	Gastric	1.88625	3360.52	3360.52	66.6297	7.62378	1.71	50.4357	2.01825e-05	1.99961e-07	ESTIMATED
CM10	WEU0115	Gastric	1.88625	3380.96	3380.88	22.7052	14.9532	3.2855	148.903	2.02436e-05	6.79719e-08	FIRST_PASS
CM10	WEU0115	Gastric	1.88625	3454.61	3455.08	27.0117	18.177	3.71905	127.91	2.04645e-05	7.99716e-08	FIRST_PASS
CM10	WEU0115	Gastric	1.88625	3484.03	3484.03	69.5637	5.96895	1.18957	50.084	2.05501e-05	2.05536e-07	ESTIMATED
CM10	WEU0115	Gastric	1.88625	3590.56	3590.56	25.1305	6.48004	1.17983	142.877	2.08619e-05	7.30144e-08	ESTIMATED
CM10	WEU0115	Gastric	1.88625	3722.3	3718.57	24.0724	45.6062	8.36328	154.475	2.12305e-05	6.87208e-08	FIRST_PASS
CM10	WEU0115	Gastric	1.88625	3905.3	3905.3	91.3592	0.92862	0.176321	42.7466	2.1757e-05	2.53636e-07	ESTIMATED
CM10	WEU0115	Gastric	1.88625	3933.25	3942.32	24.817	54.4937	10.4191	158.855	2.18599e-05	6.88128e-08	FIRST_PASS
CM10	WEU0115	Gastric	1.88625	4037.3	4030.07	28.054	14.8219	2.88112	143.654	2.21019e-05	7.69316e-08	FIRST_PASS
CM10	WEU0115	Gastric	1.88625	4065.01	4065.01	62.9196	2.93688	0.574663	64.6065	2.21975e-05	1.72358e-07	ESTIMATED
CM10	WEU0115	Gastric	1.88625	4146.61	4152.34	37.0225	11.5274	2.29329	112.157	2.24347e-05	9.99863e-08	SECOND_PASS
CM10	WEU0115	Gastric	1.88625	4211.79	4209.2	26.5771	25.1039	5.0487	158.377	2.25878e-05	7.13135e-08	FIRST_PASS
CM10	WEU0115	Gastric	1.88625	4376.6	4379.91	28.2859	40.6171	8.4413	154.844	2.30412e-05	7.44132e-08	FIRST_PASS
CM10	WEU0115	Gastric	1.88625	4489.19	4494.2	21.5794	8.70994	1.85085	208.263	2.33399e-05	5.60495e-08	SECOND_PASS
CM10	WEU0115	Gastric	1.88625	4555.41	4555.41	66.4081	7.46779	1.60605	68.5972	2.34983e-05	1.70929e-07	ESTIMATED
CM10	WEU0115	Gastric	1.88625	4585.09	4583.93	30.3607	13.6572	2.95369	150.982	2.35718e-05	7.80403e-08	SECOND_PASS
CM10	WEU0115	Gastric	1.88625	4645.37	4639.84	31.0624	17.6974	3.86996	149.372	2.37151e-05	7.93796e-08	FIRST_PASS
CM10	WEU0115	Gastric	1.88625	4698.93	4700.17	28.2447	24.9145	5.51381	166.409	2.38688e-05	7.17188e-08	FIRST_PASS
CM10	WEU0115	Gastric	1.88625	4767.2	4765.87	25.5255	296.358	67.0852	186.71	2.4035e-05	6.43669e-08	FIRST_PASS
CM10	WEU0115	Gastric	1.88625	4908.07	4901.76	36.1265	13.3522	3.20888	135.683	2.43752e-05	8.97468e-08	SECOND_PASS
CM10	WEU0115	Gastric	1.88625	4976.17	4976.57	44.8108	24.2697	6.03536	111.057	2.45605e-05	1.10532e-07	FIRST_PASS
CM10	WEU0115	Gastric	1.88625	5084.44	5084.44	33.4306	2.67974	0.701217	152.089	2.48253e-05	8.16079e-08	ESTIMATED
CM10	WEU0115	Gastric	1.88625	5303.71	5314.4	29.2357	12.8527	3.77706	181.778	2.53805e-05	6.98087e-08	FIRST_PASS
CM10	WEU0115	Gastric	1.88625	5402.2	5405.71	39.5292	12.2378	3.77819	136.753	2.55976e-05	9.35884e-08	FIRST_PASS
CM10	WEU0115	Gastric	1.88625	5524.52	5516.17	28.2094	73.4868	24.2737	195.543	2.58578e-05	6.61252e-08	FIRST_PASS
CM10	WEU0115	Gastric	1.88625	5619.57	5619.57	180.454	3.74307	1.32214	31.1413	2.6099e-05	4.2139e-07	ESTIMATED
CM10	WEU0115	Gastric	1.88625	5709.09	5709.09	54.8148	4.15145	1.5592	104.152	2.63061e-05	1.26069e-07	ESTIMATED
CM10	WEU0115	Gastric	1.88625	5818.95	5822	29.4744	6.64407	2.70981	197.527	2.65649e-05	6.72152e-08	SECOND_PASS
CM10	WEU0115	Gastric	1.88625	5885.74	5885.74	42.0359	5.0871	2.17974	140.017	2.671e-05	9.54309e-08	ESTIMATED
CM10	WEU0115	Gastric	1.88625	6201.92	6196.43	37.7471	13.2565	6.96468	164.156	2.74059e-05	8.34657e-08	FIRST_PASS
CM10	WEU0115	Gastric	1.88625	6358.11	6356.09	42.485	7.97618	4.52672	149.608	2.77567e-05	9.27533e-08	FIRST_PASS
CM10	WEU0115	Gastric	1.88625	6448.74	6448.74	225.91	3.42378	2.03698	28.5456	2.79583e-05	4.92821e-07	ESTIMATED
CM10	WEU0115	Gastric	1.88625	6699.18	6699.18	68.6552	1.39674	0.925153	97.5771	2.8496e-05	1.46173e-07	ESTIMATED
CM10	WEU0115	Gastric	1.88625	7098.61	7098.61	52.1088	2.13116	1.41744	136.227	2.93332e-05	1.07746e-07	ESTIMATED
CM10	WEU0115	Gastric	1.88625	7273.9	7273.9	43.0766	2.48184	1.65362	168.86	2.96932e-05	8.79227e-08	ESTIMATED
CM10	WEU0115	Gastric	1.88625	7327.57	7330.58	39.9837	12.2739	8.18262	183.339	2.98086e-05	8.12993e-08	FIRST_PASS
CM10	WEU0115	Gastric	1.88625	7371.7	7371.7	97.4703	4.99506	3.33144	75.6302	2.98921e-05	1.97982e-07	ESTIMATED
CM10	WEU0115	Gastric	1.88625	7498.7	7475.8	44.1127	5.78409	3.8617	169.471	3.01025e-05	8.88303e-08	FIRST_PASS
CM10	WEU0115	Gastric	1.88625	7686.69	7679.64	33.7858	9.96065	6.66361	227.304	3.05101e-05	6.71042e-08	FIRST_PASS
CM10	WEU0115	Gastric	1.88625	8039.87	8036.58	34.9573	21.9716	15.2356	229.897	3.12111e-05	6.78781e-08	FIRST_PASS
CM10	WEU0115	Gastric	1.88625	8204.63	8204.05	34.7224	21.2626	15.0616	236.275	3.15346e-05	6.67336e-08	FIRST_PASS
CM10	WEU0115	Gastric	1.88625	8316.73	8321.1	36.9854	16.1998	11.6492	224.983	3.17587e-05	7.05905e-08	FIRST_PASS
CM10	WEU0115	Gastric	1.88625	8414.87	8414.87	241.938	5.55925	4.04644	34.7811	3.19372e-05	4.56485e-07	ESTIMATED
CM10	WEU0115	Gastric	1.88625	8485.43	8479.66	42.882	14.3129	10.5062	197.744	3.20599e-05	8.10614e-08	FIRST_PASS
CM10	WEU0115	Gastric	1.88625	8577.95	8589.12	37.5041	20.7142	15.4246	229.018	3.22662e-05	7.04512e-08	FIRST_PASS
CM10	WEU0115	Gastric	1.88625	8794.7	8794.7	196.922	1.39495	1.06741	44.6609	3.265e-05	3.64016e-07	ESTIMATED
CM10	WEU0115	Gastric	1.88625	8879.33	8866.09	47.2622	8.73456	6.74787	187.594	3.27823e-05	8.73477e-08	FIRST_PASS
CM10	WEU0115	Gastric	1.88625	9114.7	9104.84	63.5822	15.9987	12.7663	143.198	3.32207e-05	1.15936e-07	FIRST_PASS
CM10	WEU0115	Gastric	1.88625	9515.82	9515.82	46.8158	1.05597	0.746294	203.261	3.39622e-05	8.35664e-08	ESTIMATED
CM10	WEU0115	Gastric	1.88625	9618.76	9618.76	83.5726	3.31833	2.21746	115.095	3.41454e-05	1.48336e-07	ESTIMATED
CM10	WEU0115	Gastric	1.88625	9788.19	9780.01	62.0448	48.6074	29.9447	157.628	3.44304e-05	1.09163e-07	FIRST_PASS
CM10	WEU0115	Gastric	1.88625	9980.84	9985.22	217.405	14.2219	8.29984	45.9292	3.47898e-05	3.78733e-07	SECOND_PASS
CM10	WEU0115	Gastric	1.88625	10079.5	10079.5	739.027	7.80245	4.61225	13.6389	3.49536e-05	1.2814e-06	ESTIMATED
CM10	WEU0115	Gastric	1.88625	10117.5	10117.5	39.0214	8.04385	4.77977	259.282	3.50196e-05	6.75e-08	ESTIMATED
CM10	WEU0115	Gastric	1.88625	10232.2	10232.2	45.0216	7.30126	4.40759	227.274	3.52175e-05	7.75e-08	ESTIMATED
CM10	WEU0115	Gastric	1.88625	10309.1	10309.1	66.3835	6.02453	3.67592	155.297	3.53496e-05	1.1375e-07	ESTIMATED
CM10	WEU0115	Gastric	1.88625	10447.6	10447.6	53.5852	4.67022	2.90547	194.972	3.55862e-05	9.125e-08	ESTIMATED
CM10	WEU0115	Gastric	1.88625	10570.1	10547	94.1641	7.45995	4.70695	112.007	3.57551e-05	1.59443e-07	SECOND_PASS
CM10	WEU0115	Gastric	1.88625	10681.8	10682.7	56.0054	9.08528	5.84509	190.743	3.59843e-05	9.43018e-08	FIRST_PASS
CM10	WEU0115	Gastric	1.88625	10806	10794.5	126.224	11.58	7.57206	85.519	3.61722e-05	2.11109e-07	FIRST_PASS
CM10	WEU0115	Gastric	1.88625	10869.9	10869.9	133.165	10.648	7.04003	81.6272	3.62983e-05	2.22706e-07	ESTIMATED
CM10	WEU0115	Gastric	1.88625	10982.1	10991.8	71.0955	9.30318	6.26288	154.606	3.65013e-05	1.1801e-07	FIRST_PASS
CM10	WEU0115	Gastric	1.88625	11090.1	11090.1	142.503	3.50651	2.39558	77.8236	3.66641e-05	2.35559e-07	ESTIMATED
CM10	WEU0115	Gastric	1.88625	11782.6	11760.1	44.9399	41.5402	37.5044	261.685	3.77554e-05	7.21276e-08	FIRST_PASS
CM10	WEU0115	Gastric	1.88625	11984.7	11975.5	93.7813	10.2941	11.0326	127.696	3.80995e-05	1.49181e-07	SECOND_PASS
CM10	WEU0115	Gastric	1.88625	12300	12300	253.664	2.08167	2.95249	48.4892	3.86123e-05	3.98153e-07	ESTIMATED
CM10	WEU0115	Gastric	1.88625	12731.2	12726.4	37.8842	1.33816	2.66686	335.929	3.92759e-05	5.8451e-08	FIRST_PASS
CM10	WEU0115	Gastric	1.88625	13373.5	13391	58.2272	5.85777	15.6007	229.979	4.02884e-05	8.759e-08	FIRST_PASS
CM10	WEU0115	Gastric	1.88625	13803	13825.8	31.2455	2.79103	8.03686	442.488	4.09372e-05	4.625e-08	FIRST_PASS
CM10	WEU0115	Gastric	1.88625	13913.6	13914.7	50.1598	4.82237	14.1186	277.408	4.10686e-05	7.4005e-08	FIRST_PASS
CM10	WEU0115	Gastric	1.88625	14136.2	14152.1	50.9966	4.59193	14.0685	277.511	4.14175e-05	7.46337e-08	FIRST_PASS
CM10	WEU0115	Gastric	1.88625	14724.3	14724.3	39.958	0.551784	1.63597	368.493	4.22464e-05	5.73319e-08	ESTIMATED
CM10	WEU0115	Gastric	1.88625	15152.9	15150.4	41.6667	0.850695	2.44396	363.608	4.28533e-05	5.89243e-08	SECOND_PASS
CM10	WEU0115	Gastric	1.88625	15310.6	15310.6	143.165	0.11977	0.340155	106.944	4.30793e-05	2.01231e-07	ESTIMATED
CM10	WEU0115	Gastric	1.88625	15864.9	15881	67.4149	0.420311	1.64805	235.571	4.38745e-05	9.30941e-08	SECOND_PASS
CM10	WEU0115	Gastric	1.88625	16033.6	16033.6	16.3539	0.0484311	0.203695	980.413	4.40847e-05	2.24807e-08	ESTIMATED
CM10	WEU0115	Gastric	1.88625	16672.7	16668.9	58.6406	14.5358	59.9609	284.256	4.49497e-05	7.90656e-08	FIRST_PASS
CM10	WEU0115	Gastric	1.88625	16824.4	16824.7	61.4718	13.5241	55.529	273.698	4.51592e-05	8.25e-08	FIRST_PASS
CM10	WEU0115	Gastric	1.88625	16960.1	16965.1	86.1554	32.7118	133.756	196.913	4.53473e-05	1.15108e-07	FIRST_PASS
CM10	WEU0115	Gastric	1.88625	17122.2	17122.2	784.414	14.9979	61.0435	21.828	4.55567e-05	1.04633e-06	ESTIMATED
CM10	WEU0115	Gastric	1.88625	17164.7	17172.5	167.038	17.7439	72.1142	102.806	4.56236e-05	2.21892e-07	FIRST_PASS
CM10	WEU0115	Gastric	1.88625	17320.2	17324.1	85.0993	13.3667	54.0868	203.575	4.58245e-05	1.125e-07	FIRST_PASS
CM10	WEU0115	Gastric	1.88625	17500.5	17517.2	567.116	8.68538	34.9503	30.8881	4.60792e-05	7.45904e-07	FIRST_PASS
CM10	WEU0115	Gastric	1.88625	17650.4	17650.4	854.305	6.56381	26.3133	20.6606	4.62541e-05	1.11938e-06	ESTIMATED
CM10	WEU0115	Gastric	1.88625	18111.6	18111.6	20.2975	3.05723	12.0991	892.307	4.68545e-05	2.625e-08	ESTIMATED
CM10	WEU0115	Gastric	1.88625	18178.6	18178.6	52.2939	3.00974	11.8892	347.623	4.69411e-05	6.75e-08	ESTIMATED
CM10	WEU0115	Gastric	1.88625	18269.1	18269.1	174.098	2.30673	9.08955	104.936	4.70578e-05	2.2375e-07	ESTIMATED
CM10	WEU0115	Gastric	1.88625	18751.1	18726.6	348.853	3.32508	12.9414	53.6806	4.76434e-05	4.43001e-07	FIRST_PASS
CM10	WEU0115	Gastric	1.88625	19150.3	19150.3	2240.1	2.02281	7.78545	8.54884	4.81793e-05	2.81788e-06	ESTIMATED
CM10	WEU0115	Gastric	1.88625	20592.5	20600.4	101.738	3.3937	12.5941	202.485	4.99702e-05	1.23386e-07	FIRST_PASS
CM10	WEU0115	Gastric	1.88625	20980.4	20980.4	140.569	1.15844	4.88803	149.253	5.0429e-05	1.6875e-07	ESTIMATED
CM10	WEU0115	Gastric	1.88625	21216.4	21216.4	62.8011	0.577534	3.40817	337.834	5.07117e-05	7.5e-08	ESTIMATED
CM10	WEU0115	Gastric	1.88625	21364.9	21364.9	213.827	0.358221	2.81781	99.9165	5.08889e-05	2.54657e-07	ESTIMATED
CM10	WEU0115	Gastric	1.88625	22355.1	22355.1	319.428	0.95631	3.94897	69.9848	5.20549e-05	3.71901e-07	ESTIMATED
CM10	WEU0115	Gastric	1.88625	23650.4	23627.4	734.538	11.9257	56.3934	32.1663	5.35156e-05	8.30132e-07	FIRST_PASS
CM10	WEU0043	Oesophagus	0.928653	1507.55	1507.87	16.2739	24.5279	7.69086	92.6557	1.35193e-05	7.29546e-08	SECOND_PASS
CM10	WEU0043	Oesophagus	0.928653	1733.86	1729.21	31.3033	19.8461	6.52575	55.2406	1.44776e-05	1.31182e-07	FIRST_PASS
CM10	WEU0043	Oesophagus	0.928653	1754.42	1751.36	52.6495	16.9887	5.61516	33.2645	1.457e-05	2.19003e-07	SECOND_PASS
CM10	WEU0043	Oesophagus	0.928653	1954.32	1954.32	23.4406	9.42877	3.50357	83.3734	1.53912e-05	9.23026e-08	ESTIMATED
CM10	WEU0043	Oesophagus	0.928653	1977.43	1977.43	101.068	10.8151	4.07464	19.5653	1.54819e-05	3.95647e-07	ESTIMATED
CM10	WEU0043	Oesophagus	0.928653	1996.56	1989.69	40.0229	13.9467	5.29338	49.7138	1.55298e-05	1.56257e-07	FIRST_PASS
CM10	WEU0043	Oesophagus	0.928653	2203.66	2200.56	31.1877	11.738	4.86212	70.5584	1.6332e-05	1.15579e-07	FIRST_PASS
CM10	WEU0043	Oesophagus	0.928653	2222.28	2222.28	77.7154	5.67839	2.36197	28.5951	1.64124e-05	2.8698e-07	ESTIMATED
CM10	WEU0043	Oesophagus	0.928653	2240.07	2240.07	53.576	6.58394	2.74803	41.811	1.6478e-05	1.97053e-07	ESTIMATED
CM10	WEU0043	Oesophagus	0.928653	2385.78	2383.6	13.376	13.4963	5.79067	178.201	1.69977e-05	4.76816e-08	FIRST_PASS
CM10	WEU0043	Oesophagus	0.928653	2447.38	2443.45	22.0363	11.5335	5.00563	110.883	1.72098e-05	7.75592e-08	FIRST_PASS
CM10	WEU0043	Oesophagus	0.928653	2544.27	2543.02	15.6858	13.6532	6.0397	162.123	1.75569e-05	5.41384e-08	FIRST_PASS
CM10	WEU0043	Oesophagus	0.928653	2578.52	2578.52	15.8332	2.14127	0.953682	162.855	1.7679e-05	5.42838e-08	ESTIMATED
CM10	WEU0043	Oesophagus	0.928653	2802.49	2798.88	18.9404	30.8044	14.5347	147.773	1.84189e-05	6.23108e-08	FIRST_PASS
CM10	WEU0043	Oesophagus	0.928653	2954.6	2954.6	36.751	2.16646	1.13051	80.3949	1.89244e-05	1.17534e-07	ESTIMATED
CM10	WEU0043	Oesophagus	0.928653	3005.81	3005.81	25.2028	2.99149	1.61634	119.265	1.90877e-05	8.00102e-08	ESTIMATED
CM10	WEU0043	Oesophagus	0.928653	3031.71	3031.71	5.57166	1.20933	0.665265	544.13	1.91698e-05	1.76096e-08	ESTIMATED
CM10	WEU0043	Oesophagus	0.928653	3101.32	3101.32	2.8182	0.919976	0.531799	1100.46	1.93886e-05	8.80814e-09	ESTIMATED
CM10	WEU0043	Oesophagus	0.928653	3360.52	3360.52	39.6837	2.6276	1.65682	84.6824	2.01825e-05	1.18988e-07	ESTIMATED
CM10	WEU0043	Oesophagus	0.928653	3380.96	3379.4	27.5038	4.02564	2.53519	122.87	2.02392e-05	8.2431e-08	SECOND_PASS
CM10	WEU0043	Oesophagus	0.928653	3454.61	3449.43	19.542	4.45712	2.79414	176.514	2.04478e-05	5.79036e-08	FIRST_PASS
CM10	WEU0043	Oesophagus	0.928653	3484.03	3484.03	10.806	1.64068	1.02625	322.417	2.05501e-05	3.18551e-08	ESTIMATED
CM10	WEU0043	Oesophagus	0.928653	3590.56	3590.56	34.528	1.90242	1.18194	103.99	2.08619e-05	1.0032e-07	ESTIMATED
CM10	WEU0043	Oesophagus	0.928653	3722.3	3722.3	77.4342	1.37592	0.847879	48.0705	2.12412e-05	2.2125e-07	ESTIMATED
CM10	WEU0043	Oesophagus	0.928653	3905.3	3901.87	25.4215	19.0366	3.8776	153.487	2.17475e-05	7.08372e-08	FIRST_PASS
CM10	WEU0043	Oesophagus	0.928653	3933.25	3933.25	69.9556	5.9554	1.07384	56.225	2.18348e-05	1.94554e-07	ESTIMATED
CM10	WEU0043	Oesophagus	0.928653	4037.3	4037.3	26.9092	4.21762	0.55221	150.034	2.21217e-05	7.38018e-08	ESTIMATED
CM10	WEU0043	Oesophagus	0.928653	4065.01	4065.01	9.04195	0.617135	0.0753499	449.572	2.21975e-05	2.46772e-08	ESTIMATED
CM10	WEU0043	Oesophagus	0.928653	4146.61	4146.61	27.1944	2.89869	0.295591	152.48	2.24192e-05	7.35163e-08	ESTIMATED
CM10	WEU0043	Oesophagus	0.928653	4211.79	4211.79	9.25659	0.733924	0.0662013	455.005	2.25947e-05	2.48394e-08	ESTIMATED
CM10	WEU0043	Oesophagus	0.928653	4376.6	4378.74	21.7885	70.0888	5.21505	200.965	2.30381e-05	5.73187e-08	FIRST_PASS
CM10	WEU0043	Oesophagus	0.928653	4489.19	4489.19	23.9609	17.2686	1.3423	187.355	2.33269e-05	6.22311e-08	ESTIMATED
CM10	WEU0043	Oesophagus	0.928653	4555.41	4555.41	28.8199	19.6711	1.57072	158.065	2.34983e-05	7.43838e-08	ESTIMATED
CM10	WEU0043	Oesophagus	0.928653	4585.09	4585.09	19.4555	6.98042	0.564234	235.671	2.35747e-05	5e-08	ESTIMATED
CM10	WEU0043	Oesophagus	0.928653	4645.37	4649.83	24.3043	161.601	13.4206	191.317	2.37406e-05	6.20438e-08	FIRST_PASS
CM10	WEU0043	Oesophagus	0.928653	4698.93	4698.93	167.379	11.504	0.975537	28.0736	2.38656e-05	4.25055e-07	ESTIMATED
CM10	WEU0043	Oesophagus	0.928653	4767.2	4763.51	24.3444	484.568	42.2572	195.672	2.4029e-05	6.14006e-08	FIRST_PASS
CM10	WEU0043	Oesophagus	0.928653	4908.07	4908.07	29.3275	26.5359	2.46922	167.354	2.43909e-05	7.28398e-08	ESTIMATED
CM10	WEU0043	Oesophagus	0.928653	4976.17	4969.5	45.7515	47.9853	4.59461	108.619	2.45431e-05	1.1298e-07	FIRST_PASS
CM10	WEU0043	Oesophagus	0.928653	5084.44	5081.34	25.6097	427.753	43.2201	198.414	2.48177e-05	6.25367e-08	FIRST_PASS
CM10	WEU0043	Oesophagus	0.928653	5303.71	5291.11	35.6476	34.1992	4.34354	148.428	2.53248e-05	8.52992e-08	FIRST_PASS
CM10	WEU0043	Oesophagus	0.928653	5402.2	5402.2	7.91428	-0.139594	-0.0212805	682.589	2.55893e-05	1.875e-08	ESTIMATED
CM10	WEU0043	Oesophagus	0.928653	5524.52	5524.52	118.435	1.74114	0.339499	46.6459	2.58774e-05	2.7865e-07	ESTIMATED
CM10	WEU0043	Oesophagus	0.928653	5619.57	5619.57	32.7979	-0.18113	-0.0449744	171.339	2.6099e-05	7.625e-08	ESTIMATED
CM10	WEU0043	Oesophagus	0.928653	5709.09	5709.09	61.7313	1.14393	0.381465	92.4829	2.63061e-05	1.42251e-07	ESTIMATED
CM10	WEU0043	Oesophagus	0.928653	5818.95	5818.95	19.2364	2.71312	1.55269	302.496	2.6558e-05	4.38981e-08	ESTIMATED
CM10	WEU0043	Oesophagus	0.928653	5885.74	5879.83	29.3138	15.3286	11.7954	200.582	2.66966e-05	6.65339e-08	FIRST_PASS
CM10	WEU0043	Oesophagus	0.928653	6201.92	6203.4	33.9014	11.9015	10.7464	182.983	2.74213e-05	7.49464e-08	FIRST_PASS
CM10	WEU0043	Oesophagus	0.928653	6358.11	6354.5	34.5182	5.01842	4.92238	184.091	2.77532e-05	7.5375e-08	FIRST_PASS
CM10	WEU0043	Oesophagus	0.928653	6448.74	6448.74	133.546	2.14769	2.22518	48.2883	2.79583e-05	2.90691e-07	ESTIMATED
CM10	WEU0043	Oesophagus	0.928653	6699.18	6694.9	39.8951	2.02063	2.449	167.813	2.84869e-05	8.49003e-08	SECOND_PASS
CM10	WEU0043	Oesophagus	0.928653	7098.61	7098.61	36.3912	0.712444	0.904357	195.064	2.93332e-05	7.52347e-08	ESTIMATED
CM10	WEU0043	Oesophagus	0.928653	7273.9	7273.9	4.19234	0.597902	0.755429	1735.05	2.96932e-05	8.55688e-09	ESTIMATED
CM10	WEU0043	Oesophagus	0.928653	7327.57	7321.73	30.5135	11.1411	14.0587	239.95	2.97906e-05	6.20709e-08	FIRST_PASS
CM10	WEU0043	Oesophagus	0.928653	7371.7	7371.7	171.139	1.82783	2.30347	43.0744	2.98921e-05	3.47117e-07	ESTIMATED
CM10	WEU0043	Oesophagus	0.928653	7498.7	7526.82	37.004	4.07185	5.11083	203.406	3.0205e-05	7.42418e-08	FIRST_PASS
CM10	WEU0043	Oesophagus	0.928653	7686.69	7680.24	38.2527	4.82076	6.1444	200.776	3.05113e-05	7.59858e-08	FIRST_PASS
CM10	WEU0043	Oesophagus	0.928653	8039.87	8033.17	35.4495	3.87769	5.18464	226.609	3.12045e-05	6.88505e-08	FIRST_PASS
CM10	WEU0043	Oesophagus	0.928653	8204.63	8204.63	35.2317	0.64097	0.877562	232.876	3.15357e-05	6.77307e-08	ESTIMATED
CM10	WEU0043	Oesophagus	0.928653	8316.73	8316.73	39.0206	1.06364	1.46368	213.137	3.17504e-05	7.44383e-08	ESTIMATED
CM10	WEU0043	Oesophagus	0.928653	8414.87	8413.71	43.7536	3.57425	4.88196	192.297	3.1935e-05	8.30154e-08	SECOND_PASS
CM10	WEU0043	Oesophagus	0.928653	8485.43	8485.38	48.965	7.42762	10.09	173.295	3.20707e-05	9.25016e-08	FIRST_PASS
CM10	WEU0043	Oesophagus	0.928653	8577.95	8585.02	76.68	4.14833	5.59321	111.959	3.22585e-05	1.44064e-07	SECOND_PASS
CM10	WEU0043	Oesophagus	0.928653	8794.7	8794.7	82.0643	0.88707	1.1777	107.168	3.265e-05	1.52531e-07	ESTIMATED
CM10	WEU0043	Oesophagus	0.928653	8879.33	8862.3	32.412	2.13668	2.82288	273.427	3.27753e-05	5.9917e-08	SECOND_PASS
CM10	WEU0043	Oesophagus	0.928653	9114.7	9104.68	70.6534	4.48783	5.82802	128.864	3.32204e-05	1.2882e-07	FIRST_PASS
CM10	WEU0043	Oesophagus	0.928653	9515.82	9523.38	36.5701	3.70635	4.67785	260.414	3.39757e-05	6.5234e-08	SECOND_PASS
CM10	WEU0043	Oesophagus	0.928653	9618.76	9586.98	95.6902	5.00643	6.29219	100.188	3.4089e-05	1.69918e-07	FIRST_PASS
CM10	WEU0043	Oesophagus	0.928653	9788.19	9778	99.6045	11.8276	14.6812	98.1683	3.44269e-05	1.75133e-07	FIRST_PASS
CM10	WEU0043	Oesophagus	0.928653	9980.84	9980.84	592.26	3.20893	3.93202	16.8521	3.47822e-05	1.03198e-06	ESTIMATED
CM10	WEU0043	Oesophagus	0.928653	10079.5	10079.5	37.4684	3.47618	4.19978	269.013	3.49536e-05	6.5e-08	ESTIMATED
CM10	WEU0043	Oesophagus	0.928653	10117.5	10117.5	16.6104	3.22217	3.85469	609.108	3.50196e-05	2.875e-08	ESTIMATED
CM10	WEU0043	Oesophagus	0.928653	10232.2	10229.9	31.0201	25.2343	29.3405	329.783	3.52135e-05	5.33875e-08	FIRST_PASS
CM10	WEU0043	Oesophagus	0.928653	10309.1	10309.1	357.262	4.47983	5.10821	28.856	3.53496e-05	6.12517e-07	ESTIMATED
CM10	WEU0043	Oesophagus	0.928653	10447.6	10448.3	73.7926	5.81615	6.41555	141.589	3.55873e-05	1.25715e-07	FIRST_PASS
CM10	WEU0043	Oesophagus	0.928653	10570.1	10570.1	72.3776	1.84714	1.98124	146.041	3.57942e-05	1.225e-07	ESTIMATED
CM10	WEU0043	Oesophagus	0.928653	10681.8	10681.8	60.1668	1.26075	1.31904	177.537	3.59829e-05	1.0125e-07	ESTIMATED
CM10	WEU0043	Oesophagus	0.928653	10806	10806	100.195	1.1928	1.21497	107.85	3.61913e-05	1.675e-07	ESTIMATED
CM10	WEU0043	Oesophagus	0.928653	10869.9	10857.9	39.8271	7.53026	7.58661	272.627	3.62783e-05	6.65229e-08	FIRST_PASS
CM10	WEU0043	Oesophagus	0.928653	10982.1	10982.1	12.7959	0.669981	0.657934	858.254	3.64851e-05	2.125e-08	ESTIMATED
CM10	WEU0043	Oesophagus	0.928653	11090.1	11090.1	40.4505	1.03252	0.99224	274.166	3.66641e-05	6.68649e-08	ESTIMATED
CM10	WEU0043	Oesophagus	0.928653	11782.6	11754.2	39.8781	123.025	130.95	294.753	3.77458e-05	6.40219e-08	FIRST_PASS
CM10	WEU0043	Oesophagus	0.928653	11984.7	11968.9	86.5412	20.0512	24.4044	138.303	3.8089e-05	1.37749e-07	FIRST_PASS
CM10	WEU0043	Oesophagus	0.928653	12300	12300	855.267	4.0611	6.32624	14.3815	3.86123e-05	1.35863e-06	ESTIMATED
CM10	WEU0043	Oesophagus	0.928653	12731.2	12716.3	61.4604	1.48631	3.54357	206.902	3.92602e-05	9.4842e-08	SECOND_PASS
CM10	WEU0043	Oesophagus	0.928653	13373.5	13385	65.9597	7.23988	21.0227	202.927	4.02793e-05	9.92365e-08	FIRST_PASS
CM10	WEU0043	Oesophagus	0.928653	13803	13827.9	96.1805	1.039	3.13085	143.771	4.09404e-05	1.42387e-07	SECOND_PASS
CM10	WEU0043	Oesophagus	0.928653	13913.6	13913.6	212.848	0.601283	1.82505	65.3687	4.1067e-05	3.14897e-07	ESTIMATED
CM10	WEU0043	Oesophagus	0.928653	14136.2	14141.7	44.4085	1.72968	5.35325	318.445	4.14022e-05	6.49967e-08	FIRST_PASS
CM10	WEU0043	Oesophagus	0.928653	14724.3	14715.5	50.6983	6.27632	20.5098	290.256	4.22338e-05	7.27519e-08	FIRST_PASS
CM10	WEU0043	Oesophagus	0.928653	15152.9	15152.9	962.455	0.875338	3.39499	15.744	4.28569e-05	1.36743e-06	ESTIMATED
CM10	WEU0043	Oesophagus	0.928653	15310.6	15285.2	417.874	0.954097	3.91991	36.5786	4.30436e-05	5.88415e-07	SECOND_PASS
CM10	WEU0043	Oesophagus	0.928653	15864.9	15864.9	105.316	0.105395	0.582703	150.641	4.38522e-05	1.45397e-07	ESTIMATED
CM10	WEU0043	Oesophagus	0.928653	16033.6	16033.6	53.2898	0.171367	0.892724	300.875	4.40847e-05	7.32717e-08	ESTIMATED
CM10	WEU0043	Oesophagus	0.928653	16672.7	16672.7	140.677	4.34713	23.9107	118.517	4.49548e-05	1.89655e-07	ESTIMATED
CM10	WEU0043	Oesophagus	0.928653	16824.4	16823	88.5404	14.9718	84.5621	190.004	4.5157e-05	1.18832e-07	FIRST_PASS
CM10	WEU0043	Oesophagus	0.928653	16960.1	16966.1	99.8406	29.2344	169.43	169.932	4.53486e-05	1.33399e-07	FIRST_PASS
CM10	WEU0043	Oesophagus	0.928653	17122.2	17122.2	615.572	12.6687	75.5663	27.8151	4.55567e-05	8.20113e-07	ESTIMATED
CM10	WEU0043	Oesophagus	0.928653	17164.7	17163.8	162.509	14.0831	84.6603	105.618	4.56121e-05	2.1593e-07	FIRST_PASS
CM10	WEU0043	Oesophagus	0.928653	17320.2	17317.9	80.3633	7.83999	48.5313	215.495	4.58163e-05	1.0625e-07	FIRST_PASS
CM10	WEU0043	Oesophagus	0.928653	17500.5	17501.9	532.281	5.98988	38.4377	32.881	4.60592e-05	7.00392e-07	FIRST_PASS
CM10	WEU0043	Oesophagus	0.928653	17650.4	17650.4	493.705	4.48588	29.659	35.751	4.62541e-05	6.46894e-07	ESTIMATED
CM10	WEU0043	Oesophagus	0.928653	18111.6	18111.6	28.9891	1.55201	11.3179	624.774	4.68545e-05	3.75e-08	ESTIMATED
CM10	WEU0043	Oesophagus	0.928653	18178.6	18178.6	65.8551	1.46883	10.8727	276.039	4.69411e-05	8.5e-08	ESTIMATED
CM10	WEU0043	Oesophagus	0.928653	18269.1	18269.1	623.35	0.916191	6.92258	29.3079	4.70578e-05	8.02817e-07	ESTIMATED
CM10	WEU0043	Oesophagus	0.928653	18751.1	18712.3	125.852	0.636583	5.34927	148.685	4.76252e-05	1.6e-07	SECOND_PASS
CM10	WEU0043	Oesophagus	0.928653	19150.3	19128.5	110.649	2.19688	20.6056	172.876	4.81519e-05	1.39264e-07	FIRST_PASS
CM10	WEU0043	Oesophagus	0.928653	20592.5	20600.4	97.836	2.77091	28.7358	210.56	4.99701e-05	1.18659e-07	FIRST_PASS
CM10	WEU0043	Oesophagus	0.928653	20980.4	20980.4	1111	0.249763	2.42136	18.8843	5.0429e-05	1.33521e-06	ESTIMATED
CM10	WEU0043	Oesophagus	0.928653	21216.4	21216.4	134.765	0.36614	3.6204	157.433	5.07117e-05	1.6125e-07	ESTIMATED
CM10	WEU0043	Oesophagus	0.928653	21364.9	21364.9	2812.03	0.355439	3.65476	7.59769	5.08889e-05	3.34897e-06	ESTIMATED
CM10	WEU0043	Oesophagus	0.928653	22355.1	22293.6	479.883	0.573526	7.82404	46.4564	5.19833e-05	5.58522e-07	FIRST_PASS
CM10	WEU0043	Oesophagus	0.928653	23650.4	23650.4	446.303	0.428043	8.44977	52.9918	5.35417e-05	5.05756e-07	ESTIMATED
CM10	WEU0044	Oesophagus	0.958577	1507.55	1505.4	24.6024	31.8068	9.95048	61.189	1.35082e-05	1.10381e-07	FIRST_PASS
CM10	WEU0044	Oesophagus	0.958577	1733.86	1730.88	71.9003	25.1603	7.44864	24.0733	1.44846e-05	2.9978e-07	FIRST_PASS
CM10	WEU0044	Oesophagus	0.958577	1754.42	1754.42	53.8963	20.9145	6.18338	32.5517	1.45827e-05	2.23994e-07	ESTIMATED
CM10	WEU0044	Oesophagus	0.958577	1954.32	1954.32	27.447	12.451	3.90919	71.2037	1.53912e-05	1.08078e-07	ESTIMATED
CM10	WEU0044	Oesophagus	0.958577	1977.43	1977.43	108.205	13.6629	4.31971	18.2748	1.54819e-05	4.23585e-07	ESTIMATED
CM10	WEU0044	Oesophagus	0.958577	1996.56	1997.28	63.2614	18.1369	5.76875	31.5718	1.55594e-05	2.46705e-07	FIRST_PASS
CM10	WEU0044	Oesophagus	0.958577	2203.66	2202.61	70.5366	14.0807	4.82723	31.2264	1.63396e-05	2.60237e-07	FIRST_PASS
CM10	WEU0044	Oesophagus	0.958577	2222.28	2222.28	64.532	10.7469	3.72288	34.4368	1.64124e-05	2.38297e-07	ESTIMATED
CM10	WEU0044	Oesophagus	0.958577	2240.07	2240.07	67.0572	10.4431	3.65208	33.4053	1.6478e-05	2.46637e-07	ESTIMATED
CM10	WEU0044	Oesophagus	0.958577	2385.78	2386.07	15.4641	12.179	4.61328	154.298	1.70065e-05	5.51255e-08	FIRST_PASS
CM10	WEU0044	Oesophagus	0.958577	2447.38	2444.75	61.5737	9.10838	3.56677	39.7044	1.72143e-05	2.15902e-07	FIRST_PASS
CM10	WEU0044	Oesophagus	0.958577	2544.27	2541.36	17.3985	10.4747	4.33953	146.068	1.75512e-05	6.00637e-08	FIRST_PASS
CM10	WEU0044	Oesophagus	0.958577	2578.52	2578.52	2.64006	1.57434	0.666894	976.688	1.7679e-05	9.05048e-09	ESTIMATED
CM10	WEU0044	Oesophagus	0.958577	2802.49	2805.24	19.6094	4.31089	2.07626	143.056	1.84399e-05	6.45001e-08	SECOND_PASS
CM10	WEU0044	Oesophagus	0.958577	2954.6	2954.6	26.3748	2.24216	1.14259	112.023	1.89244e-05	8.44254e-08	ESTIMATED
CM10	WEU0044	Oesophagus	0.958577	3005.81	3005.81	9.15948	2.66671	1.38605	328.163	1.90877e-05	2.90901e-08	ESTIMATED
CM10	WEU0044	Oesophagus	0.958577	3031.71	3031.71	1.89811	1.09612	0.575495	1597.23	1.91698e-05	6.00052e-09	ESTIMATED
CM10	WEU0044	Oesophagus	0.958577	3101.32	3101.32	6.24198	0.873425	0.471303	496.848	1.93886e-05	1.95034e-08	ESTIMATED
CM10	WEU0044	Oesophagus	0.958577	3360.52	3360.52	14.2085	0.50446	0.286313	236.515	2.01825e-05	4.27027e-08	ESTIMATED
CM10	WEU0044	Oesophagus	0.958577	3380.96	3380.96	3.86209	0.829667	0.470942	875.421	2.02438e-05	1.15607e-08	ESTIMATED
CM10	WEU0044	Oesophagus	0.958577	3454.61	3454.61	15.5058	1.38455	0.786225	222.795	2.04632e-05	4.59622e-08	ESTIMATED
CM10	WEU0044	Oesophagus	0.958577	3484.03	3484.03	29.8801	0.671872	0.381587	116.6	2.05501e-05	8.79391e-08	ESTIMATED
CM10	WEU0044	Oesophagus	0.958577	3590.56	3587.18	22.3664	6.65431	3.78137	160.382	2.08521e-05	6.49977e-08	FIRST_PASS
CM10	WEU0044	Oesophagus	0.958577	3722.3	3722.3	64.7758	0.159607	0.0759777	57.4643	2.12412e-05	1.85e-07	ESTIMATED
CM10	WEU0044	Oesophagus	0.958577	3905.3	3902.52	25.7449	57.0537	8.70321	151.584	2.17493e-05	7.17257e-08	FIRST_PASS
CM10	WEU0044	Oesophagus	0.958577	3933.25	3933.25	61.9894	9.07172	1.24189	63.4504	2.18348e-05	1.72488e-07	ESTIMATED
CM10	WEU0044	Oesophagus	0.958577	4037.3	4037.3	33.9923	4.37131	0.445139	118.771	2.21217e-05	9.31871e-08	ESTIMATED
CM10	WEU0044	Oesophagus	0.958577	4065.01	4065.01	22.0064	2.64027	0.251826	184.719	2.21975e-05	6.00843e-08	ESTIMATED
CM10	WEU0044	Oesophagus	0.958577	4146.61	4146.61	4.1264	1.08448	0.0872617	1004.9	2.24192e-05	1.11566e-08	ESTIMATED
CM10	WEU0044	Oesophagus	0.958577	4211.79	4211.79	10.072	2.17409	0.155662	418.17	2.25947e-05	2.70059e-08	ESTIMATED
CM10	WEU0044	Oesophagus	0.958577	4376.6	4377.81	23.7935	52.5194	3.1104	183.992	2.30357e-05	6.25934e-08	FIRST_PASS
CM10	WEU0044	Oesophagus	0.958577	4489.19	4489.19	24.9213	33.0313	2.07452	180.134	2.33269e-05	6.47256e-08	ESTIMATED
CM10	WEU0044	Oesophagus	0.958577	4555.41	4555.41	29.1683	36.8551	2.4001	156.177	2.34983e-05	7.52783e-08	ESTIMATED
CM10	WEU0044	Oesophagus	0.958577	4585.09	4585.09	15.5701	9.25408	0.61273	294.48	2.35747e-05	4e-08	ESTIMATED
CM10	WEU0044	Oesophagus	0.958577	4645.37	4649.18	25.6662	162.911	11.1888	181.14	2.37389e-05	6.55195e-08	FIRST_PASS
CM10	WEU0044	Oesophagus	0.958577	4698.93	4698.93	271.028	16.9391	1.19784	17.3374	2.38656e-05	6.8442e-07	ESTIMATED
CM10	WEU0044	Oesophagus	0.958577	4767.2	4762.8	25.0573	474.428	34.8664	190.076	2.40273e-05	6.31973e-08	FIRST_PASS
CM10	WEU0044	Oesophagus	0.958577	4908.07	4908.07	111.298	25.331	2.04205	44.0986	2.43909e-05	2.75335e-07	ESTIMATED
CM10	WEU0044	Oesophagus	0.958577	4976.17	4969.34	43.9062	49.1006	4.1251	113.181	2.45427e-05	1.08399e-07	FIRST_PASS
CM10	WEU0044	Oesophagus	0.958577	5084.44	5081.66	26.0266	328.748	29.9105	195.249	2.48185e-05	6.35507e-08	FIRST_PASS
CM10	WEU0044	Oesophagus	0.958577	5303.71	5303.71	47.6946	21.5056	2.33311	111.201	2.53549e-05	1.14099e-07	ESTIMATED
CM10	WEU0044	Oesophagus	0.958577	5402.2	5402.2	2.37474	0.33516	0.0412831	2274.86	2.55893e-05	5.62393e-09	ESTIMATED
CM10	WEU0044	Oesophagus	0.958577	5524.52	5524.52	75.8594	1.70111	0.267841	72.8259	2.58774e-05	1.78041e-07	ESTIMATED
CM10	WEU0044	Oesophagus	0.958577	5619.57	5619.57	9.60644	0.264788	0.0530493	584.98	2.6099e-05	2.23159e-08	ESTIMATED
CM10	WEU0044	Oesophagus	0.958577	5709.09	5709.09	36.5687	0.375072	0.100796	156.12	2.63061e-05	8.42537e-08	ESTIMATED
CM10	WEU0044	Oesophagus	0.958577	5818.95	5818.95	25.393	1.67319	0.769041	229.156	2.6558e-05	5.79177e-08	ESTIMATED
CM10	WEU0044	Oesophagus	0.958577	5885.74	5884.81	36.0597	4.38214	3.48813	163.196	2.67079e-05	8.18226e-08	FIRST_PASS
CM10	WEU0044	Oesophagus	0.958577	6201.92	6202.59	45.9711	7.32571	7.65765	134.924	2.74195e-05	1.01609e-07	FIRST_PASS
CM10	WEU0044	Oesophagus	0.958577	6358.11	6348.76	36.7129	4.12754	4.52396	172.93	2.77407e-05	8.01759e-08	FIRST_PASS
CM10	WEU0044	Oesophagus	0.958577	6448.74	6438	37.2096	3.03629	3.42855	173.02	2.7935e-05	8.06639e-08	SECOND_PASS
CM10	WEU0044	Oesophagus	0.958577	6699.18	6696.89	38.8465	3.47679	4.29805	172.393	2.84911e-05	8.26373e-08	FIRST_PASS
CM10	WEU0044	Oesophagus	0.958577	7098.61	7098.61	34.9503	0.611713	0.805933	203.106	2.93332e-05	7.22606e-08	ESTIMATED
CM10	WEU0044	Oesophagus	0.958577	7273.9	7273.9	12.089	0.438248	0.584017	601.698	2.96932e-05	2.46745e-08	ESTIMATED
CM10	WEU0044	Oesophagus	0.958577	7327.57	7323.68	29.6355	6.79239	9.08101	247.125	2.97946e-05	6.02831e-08	FIRST_PASS
CM10	WEU0044	Oesophagus	0.958577	7371.7	7371.7	102.459	1.21629	1.6312	71.9476	2.98921e-05	2.08219e-07	ESTIMATED
CM10	WEU0044	Oesophagus	0.958577	7498.7	7482.95	41.6403	2.50538	3.38442	179.704	3.01168e-05	8.37859e-08	FIRST_PASS
CM10	WEU0044	Oesophagus	0.958577	7686.69	7679.35	38.5179	13.9004	19.0187	199.371	3.05095e-05	7.65073e-08	FIRST_PASS
CM10	WEU0044	Oesophagus	0.958577	8039.87	8034.18	36.8259	7.73364	10.5365	218.166	3.12064e-05	7.1519e-08	FIRST_PASS
CM10	WEU0044	Oesophagus	0.958577	8204.63	8204.63	35.6211	1.26637	1.72056	230.331	3.15357e-05	6.84769e-08	ESTIMATED
CM10	WEU0044	Oesophagus	0.958577	8316.73	8316.73	3.13035	0.0337249	0.045738	2656.81	3.17504e-05	5.97574e-09	ESTIMATED
CM10	WEU0044	Oesophagus	0.958577	8414.87	8414.87	48.9713	0.757704	1.026	171.832	3.19372e-05	9.29499e-08	ESTIMATED
CM10	WEU0044	Oesophagus	0.958577	8485.43	8490.22	43.3531	3.08344	4.17026	195.839	3.20799e-05	8.18998e-08	SECOND_PASS
CM10	WEU0044	Oesophagus	0.958577	8577.95	8585.35	67.05	3.6829	4.97356	128.044	3.22591e-05	1.26002e-07	FIRST_PASS
CM10	WEU0044	Oesophagus	0.958577	8794.7	8794.7	70.0768	0.24882	0.345274	125.501	3.265e-05	1.30331e-07	ESTIMATED
CM10	WEU0044	Oesophagus	0.958577	8879.33	8871.79	37.6414	1.67709	2.35707	235.692	3.27928e-05	6.95887e-08	SECOND_PASS
CM10	WEU0044	Oesophagus	0.958577	9114.7	9117.41	80.4942	5.43716	7.96433	113.268	3.32437e-05	1.46714e-07	FIRST_PASS
CM10	WEU0044	Oesophagus	0.958577	9515.82	9520.18	47.782	5.7134	8.97984	199.242	3.397e-05	8.52242e-08	FIRST_PASS
CM10	WEU0044	Oesophagus	0.958577	9618.76	9616.85	65.4903	4.261	6.8149	146.844	3.4142e-05	1.1625e-07	SECOND_PASS
CM10	WEU0044	Oesophagus	0.958577	9788.19	9777.34	102.451	16.628	27.3888	95.4346	3.44257e-05	1.80129e-07	FIRST_PASS
CM10	WEU0044	Oesophagus	0.958577	9980.84	9980.84	563.238	6.50258	11.1285	17.7205	3.47822e-05	9.81412e-07	ESTIMATED
CM10	WEU0044	Oesophagus	0.958577	10079.5	10079.5	4.32575	4.32898	7.50859	2330.11	3.49536e-05	7.5e-09	ESTIMATED
CM10	WEU0044	Oesophagus	0.958577	10117.5	10117.5	22.3856	5.79419	9.95904	451.967	3.50196e-05	3.875e-08	ESTIMATED
CM10	WEU0044	Oesophagus	0.958577	10232.2	10230.2	34.2581	47.3169	79.2135	298.623	3.5214e-05	5.89585e-08	FIRST_PASS
CM10	WEU0044	Oesophagus	0.958577	10309.1	10309.1	415.29	8.47742	13.9394	24.824	3.53496e-05	7.12005e-07	ESTIMATED
CM10	WEU0044	Oesophagus	0.958577	10447.6	10443.7	96.3773	11.4632	18.2964	108.363	3.55796e-05	1.64237e-07	FIRST_PASS
CM10	WEU0044	Oesophagus	0.958577	10570.1	10587.3	203.317	5.45647	8.4466	52.0731	3.58233e-05	3.43972e-07	SECOND_PASS
CM10	WEU0044	Oesophagus	0.958577	10681.8	10681.8	62.4288	3.00516	4.56199	171.104	3.59829e-05	1.05e-07	ESTIMATED
CM10	WEU0044	Oesophagus	0.958577	10806	10806	12.6931	2.12889	3.1521	851.327	3.61913e-05	2.125e-08	ESTIMATED
CM10	WEU0044	Oesophagus	0.958577	10869.9	10869.9	100.167	2.2206	3.24685	108.518	3.62983e-05	1.67245e-07	ESTIMATED
CM10	WEU0044	Oesophagus	0.958577	10982.1	10982.1	123.805	0.726886	1.04012	88.7044	3.64851e-05	2.05656e-07	ESTIMATED
CM10	WEU0044	Oesophagus	0.958577	11090.1	11090.1	57.2762	0.536448	0.752229	193.625	3.66641e-05	9.46632e-08	ESTIMATED
CM10	WEU0044	Oesophagus	0.958577	11782.6	11758.1	44.4897	39.8333	48.2819	264.288	3.77521e-05	7.14137e-08	FIRST_PASS
CM10	WEU0044	Oesophagus	0.958577	11984.7	11971.8	106.539	8.64329	11.5406	112.37	3.80936e-05	1.69501e-07	FIRST_PASS
CM10	WEU0044	Oesophagus	0.958577	12300	12300	782.867	2.77163	4.37566	15.7115	3.86123e-05	1.24445e-06	ESTIMATED
CM10	WEU0044	Oesophagus	0.958577	12731.2	12731.2	19.6116	0.242121	0.500311	649.17	3.92833e-05	3.02525e-08	ESTIMATED
CM10	WEU0044	Oesophagus	0.958577	13373.5	13385.8	60.6917	15.8122	51.1178	220.553	4.02805e-05	9.13062e-08	FIRST_PASS
CM10	WEU0044	Oesophagus	0.958577	13803	13803	161.341	1.20278	4.39378	85.5518	4.09035e-05	2.39057e-07	ESTIMATED
CM10	WEU0044	Oesophagus	0.958577	13913.6	13907.9	211.639	2.43192	9.18095	65.7154	4.10586e-05	3.12377e-07	FIRST_PASS
CM10	WEU0044	Oesophagus	0.958577	14136.2	14136.2	158.134	1.41046	5.74004	89.3938	4.13942e-05	2.31527e-07	ESTIMATED
CM10	WEU0044	Oesophagus	0.958577	14724.3	14717.3	63.9928	2.05958	10.422	229.984	4.22364e-05	9.18317e-08	FIRST_PASS
CM10	WEU0044	Oesophagus	0.958577	15152.9	15152.9	710.647	0.678288	4.18231	21.3227	4.28569e-05	1.00496e-06	ESTIMATED
CM10	WEU0044	Oesophagus	0.958577	15310.6	15360.4	90.5271	0.96261	6.61669	169.677	4.31493e-05	1.27151e-07	SECOND_PASS
CM10	WEU0044	Oesophagus	0.958577	15864.9	15864.9	22.0681	0.0997548	0.865049	718.906	4.38522e-05	3.04993e-08	ESTIMATED
CM10	WEU0044	Oesophagus	0.958577	16033.6	16033.6	40.8788	0.138862	1.13161	392.222	4.40847e-05	5.61987e-08	ESTIMATED
CM10	WEU0044	Oesophagus	0.958577	16672.7	16672.7	150.166	1.30049	9.49517	111.028	4.49548e-05	2.02447e-07	ESTIMATED
CM10	WEU0044	Oesophagus	0.958577	16824.4	16829.5	148.425	4.01493	29.6646	113.387	4.51657e-05	1.99166e-07	FIRST_PASS
CM10	WEU0044	Oesophagus	0.958577	16960.1	16967.7	103.337	12.5985	94.0724	164.198	4.53507e-05	1.38056e-07	FIRST_PASS
CM10	WEU0044	Oesophagus	0.958577	17122.2	17122.3	270.822	7.57554	57.243	63.2234	4.55569e-05	3.60285e-07	FIRST_PASS
CM10	WEU0044	Oesophagus	0.958577	17164.7	17164.7	571.002	7.01954	53.2157	30.0606	4.56132e-05	7.60323e-07	ESTIMATED
CM10	WEU0044	Oesophagus	0.958577	17320.2	17317	88.87	4.47412	34.3222	194.857	4.58151e-05	1.175e-07	FIRST_PASS
CM10	WEU0044	Oesophagus	0.958577	17500.5	17502.2	79.8202	4.0169	31.2649	219.271	4.60596e-05	1.05e-07	FIRST_PASS
CM10	WEU0044	Oesophagus	0.958577	17650.4	17640.2	477.171	3.07724	24.2134	36.9683	4.62407e-05	6.25411e-07	SECOND_PASS
CM10	WEU0044	Oesophagus	0.958577	18111.6	18111.6	17.3916	1.15242	9.41716	1041.4	4.68545e-05	2.25e-08	ESTIMATED
CM10	WEU0044	Oesophagus	0.958577	18178.6	18178.6	76.499	1.2364	10.1586	237.632	4.69411e-05	9.875e-08	ESTIMATED
CM10	WEU0044	Oesophagus	0.958577	18269.1	18269.1	617.952	0.932825	7.72119	29.564	4.70578e-05	7.95864e-07	ESTIMATED
CM10	WEU0044	Oesophagus	0.958577	18751.1	18751.1	1715.32	0.534229	4.60236	10.9316	4.76745e-05	2.18059e-06	ESTIMATED
CM10	WEU0044	Oesophagus	0.958577	19150.3	19128.8	203.363	1.79245	15.946	94.0626	4.81523e-05	2.56148e-07	FIRST_PASS
CM10	WEU0044	Oesophagus	0.958577	20592.5	20592.1	85.3203	4.25528	30.9162	241.351	4.99602e-05	1.03482e-07	FIRST_PASS
CM10	WEU0044	Oesophagus	0.958577	20980.4	20980.4	1024.81	0.727608	4.71706	20.4724	5.0429e-05	1.23163e-06	ESTIMATED
CM10	WEU0044	Oesophagus	0.958577	21216.4	21216.4	18.8306	0.656662	4.3929	1126.7	5.07117e-05	2.25e-08	ESTIMATED
CM10	WEU0044	Oesophagus	0.958577	21364.9	21364.9	224.906	0.655944	4.4776	94.9949	5.08889e-05	2.675e-07	ESTIMATED
CM10	WEU0044	Oesophagus	0.958577	22355.1	22282.6	530.559	1.69003	13.1765	41.9982	5.19703e-05	6.16693e-07	FIRST_PASS
CM10	WEU0044	Oesophagus	0.958577	23650.4	23630.3	1173.84	1.68932	16.5381	20.1307	5.3519e-05	1.32448e-06	FIRST_PASS
CM10	WEU0045	Oesophagus	1.32806	1507.55	1510.57	20.4292	34.0973	8.59267	73.9415	1.35314e-05	9.15008e-08	SECOND_PASS
CM10	WEU0045	Oesophagus	1.32806	1733.86	1733.86	100.004	22.2061	5.80322	17.3379	1.44971e-05	4.18074e-07	ESTIMATED
CM10	WEU0045	Oesophagus	1.32806	1754.42	1751.75	71.0136	27.3076	7.15689	24.6678	1.45717e-05	2.95878e-07	FIRST_PASS
CM10	WEU0045	Oesophagus	1.32806	1954.32	1954.32	20.5547	10.4311	2.95469	95.0791	1.53912e-05	8.09387e-08	ESTIMATED
CM10	WEU0045	Oesophagus	1.32806	1977.43	1977.11	60.758	17.1172	4.89647	32.5407	1.54806e-05	2.36978e-07	FIRST_PASS
CM10	WEU0045	Oesophagus	1.32806	1996.56	1996.56	68.2019	14.4	4.15401	29.2742	1.55566e-05	2.65704e-07	ESTIMATED
CM10	WEU0045	Oesophagus	1.32806	2203.66	2203.8	17.1114	25.8538	8.17465	128.792	1.6344e-05	6.34588e-08	FIRST_PASS
CM10	WEU0045	Oesophagus	1.32806	2222.28	2222.28	66.1694	10.0532	3.20544	33.5847	1.64124e-05	2.44344e-07	ESTIMATED
CM10	WEU0045	Oesophagus	1.32806	2240.07	2240.07	55.7641	11.3493	3.64813	40.1704	1.6478e-05	2.05101e-07	ESTIMATED
CM10	WEU0045	Oesophagus	1.32806	2385.78	2388.59	12.4609	13.5397	4.49976	191.686	1.70155e-05	4.44047e-08	FIRST_PASS
CM10	WEU0045	Oesophagus	1.32806	2447.38	2446.08	23.6084	14.438	4.84596	103.611	1.7219e-05	8.30446e-08	FIRST_PASS
CM10	WEU0045	Oesophagus	1.32806	2544.27	2544.27	6.04097	0.541612	0.184876	421.169	1.75612e-05	2.08395e-08	ESTIMATED
CM10	WEU0045	Oesophagus	1.32806	2578.52	2578.52	26.6479	0.0285283	0.00979525	96.7626	1.7679e-05	9.125e-08	ESTIMATED
CM10	WEU0045	Oesophagus	1.32806	2802.49	2804.17	8.7517	5.6126	2.01299	320.414	1.84363e-05	2.87809e-08	SECOND_PASS
CM10	WEU0045	Oesophagus	1.32806	2954.6	2954.6	7.39548	3.95199	1.47027	399.514	1.89244e-05	2.36843e-08	ESTIMATED
CM10	WEU0045	Oesophagus	1.32806	3005.81	3005.81	13.1713	1.53211	0.577197	228.209	1.90877e-05	4.17806e-08	ESTIMATED
CM10	WEU0045	Oesophagus	1.32806	3031.71	3031.71	5.70715	0.683605	0.259183	531.212	1.91698e-05	1.80413e-08	ESTIMATED
CM10	WEU0045	Oesophagus	1.32806	3101.32	3101.32	3.91442	2.99114	1.15373	792.279	1.93886e-05	1.22343e-08	ESTIMATED
CM10	WEU0045	Oesophagus	1.32806	3360.52	3360.52	2.70922	2.45584	1.01527	1240.4	2.01825e-05	8.13473e-09	ESTIMATED
CM10	WEU0045	Oesophagus	1.32806	3380.96	3380.96	2.49047	3.41624	1.42131	1357.56	2.02438e-05	7.45602e-09	ESTIMATED
CM10	WEU0045	Oesophagus	1.32806	3454.61	3459.54	17.7034	4.19238	1.7877	195.417	2.04777e-05	5.23743e-08	SECOND_PASS
CM10	WEU0045	Oesophagus	1.32806	3484.03	3484.03	5.14051	3.08368	1.32515	677.759	2.05501e-05	1.51582e-08	ESTIMATED
CM10	WEU0045	Oesophagus	1.32806	3590.56	3590.08	14.5199	4.74387	2.10888	247.252	2.08605e-05	4.21684e-08	SECOND_PASS
CM10	WEU0045	Oesophagus	1.32806	3722.3	3722.3	25.6209	3.12709	1.45153	145.284	2.12412e-05	7.31432e-08	ESTIMATED
CM10	WEU0045	Oesophagus	1.32806	3905.3	3907.5	17.1307	4.96988	2.38093	228.1	2.17632e-05	4.76751e-08	SECOND_PASS
CM10	WEU0045	Oesophagus	1.32806	3933.25	3933.25	49.3719	1.69705	0.802333	79.6658	2.18348e-05	1.37343e-07	ESTIMATED
CM10	WEU0045	Oesophagus	1.32806	4037.3	4036.22	52.5797	16.2347	7.29572	76.7639	2.21187e-05	1.43853e-07	FIRST_PASS
CM10	WEU0045	Oesophagus	1.32806	4065.01	4065.01	57.2763	12.278	5.44293	70.972	2.21975e-05	1.56693e-07	ESTIMATED
CM10	WEU0045	Oesophagus	1.32806	4146.61	4146.61	20.254	0.601371	0.256806	204.731	2.24192e-05	5.47173e-08	ESTIMATED
CM10	WEU0045	Oesophagus	1.32806	4211.79	4211.79	2.17409	0.614776	0.255115	1937.27	2.25947e-05	5.831e-09	ESTIMATED
CM10	WEU0045	Oesophagus	1.32806	4376.6	4381.3	24.6673	43.2703	16.7432	177.616	2.30449e-05	6.48789e-08	FIRST_PASS
CM10	WEU0045	Oesophagus	1.32806	4489.19	4494.27	24.0431	28.9438	10.7246	186.926	2.33401e-05	6.24316e-08	FIRST_PASS
CM10	WEU0045	Oesophagus	1.32806	4555.41	4552.76	25.6215	25.5253	9.2566	177.693	2.34915e-05	6.61099e-08	FIRST_PASS
CM10	WEU0045	Oesophagus	1.32806	4585.09	4585.09	227.939	5.31306	1.90445	20.1154	2.35747e-05	5.85987e-07	ESTIMATED
CM10	WEU0045	Oesophagus	1.32806	4645.37	4648.97	33.8255	32.5188	11.397	137.44	2.37384e-05	8.6353e-08	FIRST_PASS
CM10	WEU0045	Oesophagus	1.32806	4698.93	4698.93	267.296	8.93245	3.0774	17.5795	2.38656e-05	6.75235e-07	ESTIMATED
CM10	WEU0045	Oesophagus	1.32806	4767.2	4766.82	26.1971	489.619	164.899	181.96	2.40374e-05	6.6055e-08	FIRST_PASS
CM10	WEU0045	Oesophagus	1.32806	4908.07	4908.07	126.622	9.89671	3.37137	38.7617	2.43909e-05	3.13167e-07	ESTIMATED
CM10	WEU0045	Oesophagus	1.32806	4976.17	4976.62	37.802	39.522	14.2083	131.649	2.45607e-05	9.32659e-08	FIRST_PASS
CM10	WEU0045	Oesophagus	1.32806	5084.44	5084.44	161.475	5.23106	2.0581	31.4876	2.48253e-05	3.91782e-07	ESTIMATED
CM10	WEU0045	Oesophagus	1.32806	5303.71	5303.71	52.5442	1.63414	0.792692	100.938	2.53549e-05	1.25336e-07	ESTIMATED
CM10	WEU0045	Oesophagus	1.32806	5402.2	5402.2	54.2967	0.975102	0.537289	99.4941	2.55893e-05	1.28597e-07	ESTIMATED
CM10	WEU0045	Oesophagus	1.32806	5524.52	5517.3	21.4431	3.7882	2.56108	257.3	2.58605e-05	5.02713e-08	FIRST_PASS
CM10	WEU0045	Oesophagus	1.32806	5619.57	5619.57	7.68844	0.113553	0.0959249	730.912	2.6099e-05	1.7853e-08	ESTIMATED
CM10	WEU0045	Oesophagus	1.32806	5709.09	5709.09	7.74781	0.689011	0.680466	736.865	2.63061e-05	1.78542e-08	ESTIMATED
CM10	WEU0045	Oesophagus	1.32806	5818.95	5821.59	31.5349	3.79884	3.83129	184.608	2.6564e-05	7.19378e-08	FIRST_PASS
CM10	WEU0045	Oesophagus	1.32806	5885.74	5887.7	33.4155	7.54001	7.69964	176.197	2.67144e-05	7.58299e-08	FIRST_PASS
CM10	WEU0045	Oesophagus	1.32806	6201.92	6199.65	38.0819	19.6023	21.2534	162.798	2.7413e-05	8.41809e-08	FIRST_PASS
CM10	WEU0045	Oesophagus	1.32806	6358.11	6357.33	45.4534	9.39664	10.51	139.865	2.77594e-05	9.9203e-08	FIRST_PASS
CM10	WEU0045	Oesophagus	1.32806	6448.74	6446.22	40.1056	5.95049	6.77499	160.731	2.79528e-05	8.69312e-08	FIRST_PASS
CM10	WEU0045	Oesophagus	1.32806	6699.18	6704.42	36.4497	2.29444	2.75407	183.936	2.85071e-05	7.75268e-08	FIRST_PASS
CM10	WEU0045	Oesophagus	1.32806	7098.61	7098.61	30.1014	0.824833	1.08068	235.823	2.93332e-05	6.21891e-08	ESTIMATED
CM10	WEU0045	Oesophagus	1.32806	7273.9	7273.9	15.3609	0.136647	0.18673	473.535	2.96932e-05	3.13527e-08	ESTIMATED
CM10	WEU0045	Oesophagus	1.32806	7327.57	7323.56	30.2309	2.25101	3.11369	242.254	2.97944e-05	6.14721e-08	FIRST_PASS
CM10	WEU0045	Oesophagus	1.32806	7371.7	7371.7	92.151	1.44336	2.02039	79.9959	2.98921e-05	1.87014e-07	ESTIMATED
CM10	WEU0045	Oesophagus	1.32806	7498.7	7498.7	63.0707	0.540058	0.780454	118.894	3.01485e-05	1.26535e-07	ESTIMATED
CM10	WEU0045	Oesophagus	1.32806	7686.69	7686.69	13.8539	0.39566	0.600262	554.839	3.05241e-05	2.75091e-08	ESTIMATED
CM10	WEU0045	Oesophagus	1.32806	8039.87	8034.12	32.4826	1.95622	2.59573	247.336	3.12063e-05	6.30705e-08	FIRST_PASS
CM10	WEU0045	Oesophagus	1.32806	8204.63	8204.63	47.9121	2.00551	2.6226	171.243	3.15357e-05	9.20208e-08	ESTIMATED
CM10	WEU0045	Oesophagus	1.32806	8316.73	8316.73	41.1567	1.3467	1.74462	202.075	3.17504e-05	7.8561e-08	ESTIMATED
CM10	WEU0045	Oesophagus	1.32806	8414.87	8417.62	43.9832	10.8329	13.9174	191.383	3.19424e-05	8.34517e-08	FIRST_PASS
CM10	WEU0045	Oesophagus	1.32806	8485.43	8493.25	58.1962	18.8983	24.1301	145.942	3.20856e-05	1.09896e-07	FIRST_PASS
CM10	WEU0045	Oesophagus	1.32806	8577.95	8588.97	89.124	10.4562	13.2483	96.371	3.22659e-05	1.67405e-07	FIRST_PASS
CM10	WEU0045	Oesophagus	1.32806	8794.7	8794.7	945.461	3.04845	3.80033	9.30202	3.265e-05	1.755e-06	ESTIMATED
CM10	WEU0045	Oesophagus	1.32806	8879.33	8879.33	1109.54	2.28599	2.83122	8.00272	3.28067e-05	2.04973e-06	ESTIMATED
CM10	WEU0045	Oesophagus	1.32806	9114.7	9106.92	72.2192	9.6439	11.7399	126.101	3.32245e-05	1.31659e-07	FIRST_PASS
CM10	WEU0045	Oesophagus	1.32806	9515.82	9515.82	57.8162	4.16114	4.91711	164.587	3.39622e-05	1.03174e-07	ESTIMATED
CM10	WEU0045	Oesophagus	1.32806	9618.76	9601.6	84.625	7.83456	9.20208	113.461	3.4115e-05	1.50243e-07	FIRST_PASS
CM10	WEU0045	Oesophagus	1.32806	9788.19	9780.96	63.5805	17.5471	20.4337	153.836	3.44321e-05	1.11871e-07	FIRST_PASS
CM10	WEU0045	Oesophagus	1.32806	9980.84	9980.84	186.75	4.81695	5.57818	53.445	3.47822e-05	3.2625e-07	ESTIMATED
CM10	WEU0045	Oesophagus	1.32806	10079.5	10079.5	7.9287	3.48087	4.02001	1271.27	3.49536e-05	1.375e-08	ESTIMATED
CM10	WEU0045	Oesophagus	1.32806	10117.5	10116.7	52.9709	7.35563	8.48626	190.986	3.50181e-05	9.1677e-08	SECOND_PASS
CM10	WEU0045	Oesophagus	1.32806	10232.2	10236.7	35.8728	70.9099	81.5423	285.362	3.52252e-05	6.17171e-08	FIRST_PASS
CM10	WEU0045	Oesophagus	1.32806	10309.1	10309.1	317.597	12.2332	14.04	32.4599	3.53496e-05	5.4383e-07	ESTIMATED
CM10	WEU0045	Oesophagus	1.32806	10447.6	10450.3	90.0411	12.8931	14.7414	116.061	3.55907e-05	1.53382e-07	FIRST_PASS
CM10	WEU0045	Oesophagus	1.32806	10570.1	10570.1	76.841	4.82971	5.50452	137.558	3.57942e-05	1.3e-07	ESTIMATED
CM10	WEU0045	Oesophagus	1.32806	10681.8	10681.8	37.0943	3.4808	3.95548	287.965	3.59829e-05	6.25e-08	ESTIMATED
[truncated: 10,727 more rows]
